# Supplementary material for: Global access to COVID-19 vaccines: a scoping review of factors that may influence equitable access for low and middle-income countries
Source: PubMed Central journal article supplement — BMJ Open. 2021 Sep 30;11(9):e049505. doi: 10.1136/bmjopen-2021-049505 (PMC8487019; doi:10.1136/bmjopen-2021-049505), 2021-09-30
Supplement: bmjopen-2021-049505.draft_revisions.pdf [file bmjopen-2021-049505.draft_revisions.pdf]

# BMJ Open

BMJ Open is committed to open peer review. As part of this commitment we make the peer review history of every article we publish publicly available.

When an article is published we post the peer reviewers' comments and the authors' responses online. We also post the versions of the paper that were used during peer review. These are the versions that the peer review comments apply to.

The versions of the paper that follow are the versions that were submitted during the peer review process. They are not the versions of record or the final published versions. They should not be cited or distributed as the published version of this manuscript.

BMJ Open is an open access journal and the full, final, typeset and author-corrected version of record of the manuscript is available on our site with no access controls, subscription charges or pay-per-view fees (<http://bmjopen.bmj.com>).

If you have any questions on BMJ Open's open peer review process please email [info.bmjopen@bmj.com](mailto:info.bmjopen@bmj.com)

# BMJ Open

## Factors influencing global equitable access to COVID-19 vaccines for Low-and Middle-Income Countries: A scoping review

|                               |                                                                                                                                                                                                                                                                                                                                            |
|-------------------------------|--------------------------------------------------------------------------------------------------------------------------------------------------------------------------------------------------------------------------------------------------------------------------------------------------------------------------------------------|
| Journal:                      | <i>BMJ Open</i>                                                                                                                                                                                                                                                                                                                            |
| Manuscript ID                 | bmjopen-2021-049505                                                                                                                                                                                                                                                                                                                        |
| Article Type:                 | Original research                                                                                                                                                                                                                                                                                                                          |
| Date Submitted by the Author: | 26-Jan-2021                                                                                                                                                                                                                                                                                                                                |
| Complete List of Authors:     | Peacocke, Elizabeth; Norwegian Institute of Public Health, Division for Health Services<br>Frønsdal, Katrine; Norwegian Institute of Public Health Knowledge Centre for the Health Services, Division for Health Services<br>Heupink, Lieke; Folkehelseinstituttet, Global Health;<br>Chola, Lumbwe; Norwegian Institute of Public Health, |
| Keywords:                     | COVID-19, Public health < INFECTIOUS DISEASES, PUBLIC HEALTH, Health policy < HEALTH SERVICES ADMINISTRATION & MANAGEMENT                                                                                                                                                                                                                  |
|                               |                                                                                                                                                                                                                                                                                                                                            |

SCHOLARONE™  
Manuscripts

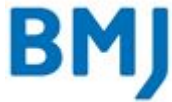

I, the Submitting Author has the right to grant and does grant on behalf of all authors of the Work (as defined in the below author licence), an exclusive licence and/or a non-exclusive licence for contributions from authors who are: i) UK Crown employees; ii) where BMJ has agreed a CC-BY licence shall apply, and/or iii) in accordance with the terms applicable for US Federal Government officers or employees acting as part of their official duties; on a worldwide, perpetual, irrevocable, royalty-free basis to BMJ Publishing Group Ltd ("BMJ") its licensees and where the relevant Journal is co-owned by BMJ to the co-owners of the Journal, to publish the Work in this journal and any other BMJ products and to exploit all rights, as set out in our [licence](#).

The Submitting Author accepts and understands that any supply made under these terms is made by BMJ to the Submitting Author unless you are acting as an employee on behalf of your employer or a postgraduate student of an affiliated institution which is paying any applicable article publishing charge ("APC") for Open Access articles. Where the Submitting Author wishes to make the Work available on an Open Access basis (and intends to pay the relevant APC), the terms of reuse of such Open Access shall be governed by a Creative Commons licence – details of these licences and which [Creative Commons](#) licence will apply to this Work are set out in our licence referred to above.

Other than as permitted in any relevant BMJ Author's Self Archiving Policies, I confirm this Work has not been accepted for publication elsewhere, is not being considered for publication elsewhere and does not duplicate material already published. I confirm all authors consent to publication of this Work and authorise the granting of this licence.

1  
2  
3  
4 **FACTORS INFLUENCING GLOBAL EQUITABLE ACCESS TO**  
5  
6  
7 **COVID-19 VACCINES FOR LOW-AND MIDDLE-INCOME**  
8  
9  
10 **COUNTRIES: A SCOPING REVIEW**  
11  
12

13 **Authors: Elizabeth Peacocke, Katrine Frønsdal, Lieke Fleur Heupink, Lumbwe Chola**  
14

15  
16  
17  
18 Corresponding author: Elizabeth Peacocke, DPH, Norwegian Institute of Public Health, Division for  
19 Health Services (a) [Elizabeth.Peacocke@fhi.no](mailto:Elizabeth.Peacocke@fhi.no), t. +47 941 60 559  
20  
21

22  
23  
24 Katrine Bjørnebek Frønsdal, PhD. [Katrine.Fronsdal@fhi.no](mailto:Katrine.Fronsdal@fhi.no), Norwegian Institute of Public Health (a)  
25

26 Lieke Fleur Heupink, MSc. [LiekeFleur.Heupink@fhi.no](mailto:LiekeFleur.Heupink@fhi.no), Norwegian Institute of Public Health (a)  
27

28 Lumbwe Chola, PhD. [Lumbwe.Chola@fhi.no](mailto:Lumbwe.Chola@fhi.no), Norwegian Institute of Public Health (a)  
29  
30

31  
32 (a) Norwegian Institute of Public Health  
33

34 Division for Health Services  
35

36 Postbox 222 Skøyen, 0213 Oslo, NORWAY  
37

38 Visiting address: Sandakerveien 24C, entrance D11, 0473 Oslo, NORWAY  
39  
40  
41  
42

43 *Key words: COVID-19 vaccine, equitable access, fair allocation, equitable distribution, scoping review*  
44

45 Word Count: 5071 (incl. abstract)  
46  
47  
48  
49  
50  
51  
52  
53  
54  
55  
56  
57  
58  
59  
60

## Abstract

Background: In the last months of 2020 several COVID-19 vaccines reached the stage of development where they could be introduced as a public health measure to help curb the pandemic. With one vaccine receiving the Emergency Use Listing from the World Health Organization in December, the international community is now facing the challenge of how to ensure equitable distribution and access to COVID-19 vaccines globally. Historic approaches indicate that possible inequities in distribution and access are more likely to affect countries with less resources. In this scoping review, we have systematically reviewed the literature to identify factors that can influence the equitable access of COVID-19 vaccines relevant for Low- and middle- income countries.

Methods: The review followed the PRISMA guidelines for scoping reviews and a five-stage framework for scoping studies. Searches in four databases of peer-reviewed journals resulted in 1,492 unique citations screened to the topic based on titles and abstracts. 78 citations were considered relevant and further reviewed in full text, of which 13 were selected as meeting our predefined inclusion criteria, with no limitations based on study design nor publication type.

Results: Through our analysis of identified factors, we derived six key messages: 1) Collectively agreed global mechanisms or frameworks may facilitate equitable access to COVID-19 vaccines, 2) Financial mechanisms such as collective Advanced Purchase Agreements may favor fair allocation, 3) Large-scale vaccine manufacturing and distribution can support fair allocation, 4) Sharing manufacturing know-how with Middle income countries can support supply of COVID-

1  
2  
3 19 vaccines, 5) Reciprocity facilitates equitable access, and 6) Countries' strength in  
4  
5 implementing vaccination programs may influence their populations access to vaccines.  
6  
7  
8  
9

10 Conclusion: This scoping review determines the main challenges facing equitable access to  
11  
12 COVID-19 vaccines, but does not aim to provide solutions on how to overcome these challenges.  
13  
14 However, the majority of the articles pointed to collectively agreed and legally binding  
15  
16 mechanisms as likely to be essential for the fair allocation and equitable access to COVID-19  
17  
18 vaccines between countries.  
19  
20  
21  
22  
23

#### 24 Strengths and limitations of the study

- 25  
26 - Literature was exclusively chosen based on relevance to the topic of identifying and  
27  
28 describing factors related to equitable access as identified in peer-reviewed journals, no  
29  
30 additional quality assessment of the articles was completed.  
31  
32
- 33 - The search was completed once (28 August 2020), in light of the numerous papers published  
34  
35 related to the COVID-19 pandemic on a daily basis, there may be relevant articles published  
36  
37 after our search that should have been included in this brief.  
38  
39
- 40 - We followed the Preferred Reporting Items for Systematic reviews and Meta-Analyses  
41  
42 extension for Scoping Reviews (PRISMA-ScR) and were guided by the Arksey and  
43  
44 O'Malley's five-stage framework through the steps of the review.  
45  
46  
47  
48  
49  
50

#### 51 **Key questions**

52  
53  
54 What is already known?  
55  
56  
57  
58  
59  
60

- 1  
2  
3 • The international community is facing the challenge of how to ensure a fair and  
4 transparent global distribution and equitable access to COVID-19 vaccines. There continues to  
5 be a need for action related to equity considerations and ensuring global coordination and  
6 distribution mechanisms of vaccines for Low- and middle- income countries.  
7  
8  
9  
10  
11  
12 • Countries' tendencies to control the global supply of personal protective equipment and  
13 ventilators at the beginning of the COVID-19 pandemic are proving to continue with those  
14 pandemic vaccines that received regulatory approval.  
15  
16  
17  
18  
19 • Historic approaches to vaccine distribution indicate that possible inequities in distribution  
20 and access are more likely to affect countries with less resources.  
21  
22  
23  
24  
25  
26  
27

28 What are the new findings?

- 29  
30  
31 • This scoping review indicates that collectively agreed global mechanisms or frameworks  
32 may facilitate equitable access to COVID-19 vaccines; Financial mechanisms such as collective  
33 Advanced Purchase Agreements may favor fair allocation; Large-scale vaccine manufacturing  
34 and distribution can support fair allocation; Sharing manufacturing know-how with Middle  
35 income countries can support supply of COVID-19 vaccines; Reciprocity facilitates equitable  
36 access; and Countries' strength in implementing vaccination programs may influence their  
37 populations access to vaccines.  
38  
39  
40  
41  
42  
43  
44  
45  
46  
47  
48

49 What do new findings imply?

- 50  
51 • There are lessons to be learnt from previous experiences and support the understanding of  
52 principles related to equitable access to a COVID-19 vaccine, and through determining these key  
53  
54  
55

1  
2  
3 factors, which can potentially guide implementation of future initiatives to ensure equitable  
4  
5 access.  
6  
7  
8  
9

## 11 INTRODUCTION

12 The Coronavirus Disease of 2019 (COVID-19) was declared a pandemic by the World Health  
13 Organization (WHO) on March 11, 2020. Considerable efforts have been mobilized in  
14  
15 developing vaccines and investing in manufacturing capacity, for which there is unprecedented  
16  
17 demand. The manufacturing capacities and infrastructure requirements for vaccine production  
18  
19 and distribution will depend on the type of vaccine candidates that prove to be most successful in  
20  
21 combating the pandemic, and will in turn determine the necessary manufacturing capacity<sup>2</sup>. The  
22  
23 demand for safe, affordable, and effective COVID-19 vaccines is expected to outstrip supply for  
24  
25 a considerable period of time<sup>3</sup>.  
26  
27  
28  
29

30  
31  
32  
33 The lesson from previous pandemics is that the benefit of new vaccines is not shared equally  
34  
35 across countries. Low- and middle- income countries (LMICs) face unique challenges in  
36  
37 accessing vaccines as they do not have the same resources to purchase vaccines and are less  
38  
39 likely to have the know-how and technological capacity to be able to manufacture their own  
40  
41 vaccines. They are therefore more reliant on multilaterally agreed frameworks or bilateral  
42  
43 support to access new technologies<sup>4</sup>. Within the LMIC group of countries there are unique  
44  
45 considerations for Middle income countries (MICs). Some MICs are established vaccine  
46  
47 manufacturing nations whose expertise can support the scale-up of vaccine manufacturing. In  
48  
49 addition for those MICs that have the financial means to purchase COVID-19 vaccines, they may  
50  
51  
52  
53  
54



1  
2  
3 face uncertainty in their ability to obtain vaccines, as was experienced by Mexico, which were  
4  
5 marginalized in the 2009 influenza A (H1N1) (“Swine flu”) pandemic<sup>5</sup>.  
6  
7

8  
9  
10 The global community has previously in part responded to the abovementioned shortcomings  
11  
12 with mechanisms designed to promote equitable access. The 2006 WHO Global pandemic  
13  
14 influenza action plan, for instance, which was produced to support increased vaccine supply and  
15  
16 the global vaccine manufacturing capacity by enabling technology transfer to MICs<sup>6</sup>. The  
17  
18 Pandemic Influenza Preparedness (PIP) Framework developed following the H5N1 outbreak in  
19  
20 Indonesia 2005 triggered increased interest in the Global Influenza Surveillance and Response  
21  
22 System (GISRS), which in turn lead to the WHO intergovernmental process and further scrutiny  
23  
24 of the GISRS and its influence related to the development of influenza vaccines<sup>7</sup>. Following the  
25  
26 Swine flu in 2009, this pressure increased, and it was acknowledged that the lacking vaccine  
27  
28 distribution system was associated with the failure to ensure fairness, transparency and equity in  
29  
30 access to vaccines for LMIC<sup>4 7 8</sup>.  
31  
32  
33  
34  
35  
36  
37

38 Specifically for COVID-19, WHO has led the Access to COVID-19 Tools (ACT) Accelerator  
39  
40 global collaboration, designed to fast-track development, production, and equitable access to  
41  
42 COVID-19 tests, treatments and vaccines<sup>9</sup>. COVAX, the vaccines pillar of the ACT, is an  
43  
44 initiative whose role is proving to be integral in the equitable distribution and access to COVID-  
45  
46 19 vaccines<sup>10</sup>. COVAX is co-led by the Coalition for Epidemic Preparedness Innovations  
47  
48 (CEPI), a vaccine funding initiative, and Gavi, the vaccine alliance (Gavi). Member countries of  
49  
50 COVAX include those that are self-financing investments but also others that are being  
51  
52 supported through aid. Figure 1 provides an overview including timeline of introduced  
53  
54  
55

1  
2  
3 mechanisms and guidelines before and following relevant pandemic events, as identified in our  
4  
5 scoping review.  
6  
7  
8  
9  
10  
11  
12  
13  
14  
15  
16  
17  
18  
19  
20  
21  
22  
23  
24  
25  
26  
27  
28  
29  
30  
31  
32  
33  
34  
35  
36  
37  
38  
39  
40  
41  
42  
43  
44  
45  
46  
47  
48  
49  
50  
51  
52  
53  
54  
55  
56  
57  
58  
59  
60

For peer review only

**Figure 1: Timeline of introduced mechanisms**

*These introduced mechanisms and guidelines are as identified in the 13 articles included in the scoping review*

[attached as a .jpg file]

Most support the idea that access and distribution of COVID-19 vaccines should be equitable across countries, but what “equity” means in this context is often not specified. From the perspective of LMICs, equitable access to a vaccine is fundamentally linked to a fair and transparent global distribution framework. There are, however, different views of what equitable access to a COVID-19 vaccine for LMICs will mean. For the purpose of this review, equitable access is interpreted as all countries, and their populations, having equal access to COVID-19 vaccines, irrespective of the income status of the country in which they reside. Further, we considered a COVID-19 vaccine as an essential medicine\* and we have used the WHO definition of health equity<sup>11 12</sup>. Several proposals have been made for equitable access of a COVID-19 vaccine between countries. In its first phase, COVAX plans to allocate vaccines in proportion to countries’ total population so that all countries receive doses to cover 20% of their population<sup>13 14</sup>. Alternative proposals exist, including The Fair Priority Model proposed by a group of ethicists. This model goes beyond proportional allocation by proceeding with allocation of vaccines in three phases, that would in the first instance prioritize the prevention of more urgent harms earlier<sup>15 16</sup>. The ethical rationale behind this model argues that proportional allocation, as suggested by WHO and COVAX, is not the fairest solution as it implies that some

1  
2  
3 countries that have a relatively lower risk of death and disease from COVID-19, would receive  
4  
5 access to vaccines at the expense of other countries that are facing more exposure<sup>16</sup>.  
6  
7  
8  
9

10 The aim of this scoping review is to identify and summarize the factors related to the equitable  
11  
12 access of a COVID-19 vaccine for LMICs. To our knowledge, the literature related to the  
13  
14 equitable access of a COVID-19 vaccine relevant for LMIC has not been systematically  
15  
16 investigated. The review is considered highly relevant to the current situation as it can provide  
17  
18 lessons from previous experiences and support the understanding of principles related to  
19  
20 equitable access to a COVID-19 vaccine, and through determining these key factors, further  
21  
22 potentially guide implementation of future initiatives to ensure equitable access.  
23  
24  
25  
26

27 *\*Essential medicines are those that satisfy the priority health care needs of the population*  
28 *^Health equity or “equity in health” implies that ideally everyone should have a fair opportunity*  
29 *to attain their full health potential and that no one should be disadvantaged from achieving this*  
30 *potential*  
31  
32

### 33 **METHODS**

34 To enable replication of the search strategy and increasing the reliability of the study findings we  
35  
36 performed systematic scoping searches for publications following the Preferred Reporting Items  
37  
38 for Systematic reviews and Meta-Analyses extension for Scoping Reviews (PRISMA-ScR) and  
39  
40 we were guided by the Arksey and O'Malley's five-stage framework through the steps of the  
41  
42 review<sup>17 18</sup>. The study protocol was peer reviewed by methodological and subject experts at the  
43  
44 Norwegian Institute of Public Health (NIPH).  
45  
46  
47  
48  
49

50 Based on predefined inclusion criteria (Table 1), we systematically searched in the following  
51  
52 four databases: Medline (PubMed and Ovid), EMBASE (Ovid), Global Index Medicus, WHO  
53  
54

https://www.globalindexmedicus.net/ and Web of Science Core Collection Clarivate Analytic.

An information specialist in collaboration with co-authors developed the search strategies for the different databases (for complete search strategies, see Appendix 1). The searches were performed on 28 August 2020, and limited to published literature, with no limitations based on study design or publication type. The articles were exclusively chosen based on relevance to the topic of identifying and describing factors related to equitable access to vaccines, with no additional quality assessment of the publications selected.

**Table 1: Inclusion criteria**

| Criterion       | Inclusion                                                                              |
|-----------------|----------------------------------------------------------------------------------------|
| Time            | 01 January 2002 - 28 August 2020                                                       |
| Language        | English                                                                                |
| Type of article | Published in peer reviewed journals                                                    |
| Article focus   | Pandemic vaccines incl. influenza or COVID-19 vaccine                                  |
| Outcomes        | Factors influencing equitable access to a pandemic vaccine including COVID-19 vaccines |

Publications were first screened based on title and abstract according to the inclusion criteria.

Two reviewers independently selected articles to be considered for full text screening. Selected articles were then read in full and considered for inclusion or exclusion by two different reviewers. Final decision of inclusion of relevant articles was determined through consultation between three of the reviewers. Any disagreements were resolved through discussions to reach consensus. See Appendix 2 for a list of the excluded articles and reason for exclusion.

1  
2  
3  
4  
5 Data extraction was performed by one reviewer and verified by a second. Standard data  
6  
7 extraction templates were used and adapted to extract information related to: the equitable access  
8  
9 of a COVID-19 vaccine relevant for LMICs, global initiatives addressing equitable access to  
10  
11 pandemic vaccines, challenges in implementing equitable access to vaccination, and  
12  
13 recommendations for strengthening the equitable access to vaccination. Data were extracted and  
14  
15 analyzed using a combination of adapting the multi-value ethical framework proposed by Liu et  
16  
17 al. and inductive reasoning based on the findings from the literature<sup>19</sup>.  
18  
19  
20  
21

## 22 **RESULTS**

23 Excluding duplicates, we identified 1,492 potentially relevant articles (Figure 2). Screenings first  
24  
25 based on title and abstract then on full text resulted in the final inclusion of 13 publications. See  
26  
27 Appendix 3 for a description of the papers included in the review.  
28  
29  
30  
31

### 32 **Figure 2: PRISMA flow-chart for selection of articles**

33  
34  
35  
36  
37 [attached as a .jpg file]  
38  
39  
40  
41

42 We categorized the identified issues from the included citations into six thematic areas of factors  
43  
44 potentially influencing access to COVID-19 vaccines in LMIC as presented below in a summary  
45  
46 of the main findings (Table 2).  
47  
48  
49  
50  
51  
52  
53  
54

1  
2  
3  
4  
5  
6  
7  
8  
9  
10  
11  
12  
13  
14  
15  
16  
17  
18  
19  
20  
21  
22  
23  
24  
25  
26  
27  
28  
29  
30  
31  
32  
33  
34  
35  
36  
37  
38  
39  
40  
41  
42  
43  
44  
45  
46  
47  
48  
49  
50  
51  
52  
53  
54  
55  
56  
57  
58  
59  
60

For peer review only

**Table 2: Summary of main findings**

| Theme categorization                                                                                        | Scoping review finding                                                                                                                       | Articles contributing to the finding |
|-------------------------------------------------------------------------------------------------------------|----------------------------------------------------------------------------------------------------------------------------------------------|--------------------------------------|
| Collectively agreed global mechanisms or frameworks may facilitate equitable access to COVID-19 vaccines    | Acting collectively and coordinated efforts across countries will facilitate equitable allocation of pandemic vaccines                       | 20-23                                |
|                                                                                                             | Global frameworks and multilateral organisations facilitate solidarity                                                                       | 4 21 24                              |
|                                                                                                             | Examples of failures in collective action related to pandemic vaccines                                                                       | 5 25                                 |
|                                                                                                             | Historical vaccine donation and pledging systems have proven to be insufficient                                                              | 20 24 26                             |
| Financial mechanisms such as collective Advanced Purchase Agreements may favor fair allocation              | Financing mechanisms such as advanced purchase agreements (APA) can facilitate access in LMIC                                                | 4 21 26 27                           |
|                                                                                                             | Place of vaccine manufacturing influences exporting of vaccines e.g. through national sovereignty over national borders                      | 4 27-29                              |
|                                                                                                             | Pandemic vaccines will largely be purchased by, and for use in, High income countries (HICs)                                                 | 20 22 24 30                          |
|                                                                                                             | Nationalistic ideologies can conflict with greater good of the world                                                                         | 1 5 22 24                            |
|                                                                                                             | LMICs cannot procure or negotiate the purchase of pandemic vaccines at the same level as HICs                                                | 4 30                                 |
| Large-scale vaccine manufacturing and distribution can support fair allocation                              | Substantial investment is required to finance global vaccine manufacturing                                                                   | 5 21-23 31                           |
|                                                                                                             | Disparity between countries that have the capacity to produce vaccines and those that use vaccines                                           | 5 21 24 28                           |
| Sharing manufacturing know-how with MICs can support supply of COVID-19 vaccines                            | Capacity building for technology transfer will support vaccine manufacturing and technology transfer in LMIC                                 | 4                                    |
|                                                                                                             | Technology transfer of vaccine manufacturing (especially to MIC) supports increased supply                                                   | 4 20                                 |
| Reciprocity facilitates equitable access to vaccines                                                        | Historical attempts at equitable distribution of vaccines have disproportionately supported HIC and have not secured those benefits for LMIC | 1 4 20 26 31                         |
|                                                                                                             | Manufacturers have historically not reliably committed to reserving production of vaccines to LMIC                                           | 4 24                                 |
| Countries' strength in implementing vaccination programs may influence their populations access to vaccines | A country's ability to vaccinate should be a consideration in equitable distribution                                                         | 22                                   |
|                                                                                                             | Influenza vaccination has not been prioritized in LMIC compared to HIC                                                                       | 20                                   |
|                                                                                                             | A countries' regulatory approval and market authorization processes for vaccines can facilitate the distribution of vaccines                 | 20 28                                |



1  
2  
3 *1. Collectively agreed global mechanisms or frameworks may facilitate equitable access to*  
4  
5 *COVID-19 vaccines*  
6

7  
8 The COVID-19 pandemic is a global crisis, the included articles suggest that collective efforts  
9  
10 are therefore warranted to curb its most devastating effects. Global collective agreements on how  
11  
12 to achieve this would need to take into account diverging perspectives of a complex global  
13  
14 governance architecture and need to be negotiated between various interest groups, including  
15  
16 national governments, the pharmaceutical industry, small biotechnology firms, and multilateral  
17  
18 institutions. It is multilateral institutions, such as the United Nations or WHO, that have the  
19  
20 global mandate to convene interest groups, advocate for collective response measures, as well as  
21  
22 the investment, procurement and distribution of pandemic vaccines. Such measures may be  
23  
24 facilitated by prompt agreement on equitable access frameworks<sup>20-23</sup>. However, the Swine flu  
25  
26 pandemic showed that even affirmed global principles, such as the 2003 World Health Assembly  
27  
28 (WHA) declaration on the prevention and control of influenza pandemics, did not prevent a MIC  
29  
30 (Mexico) being adversely affected from accessing vaccines<sup>5 25</sup>. The 2011 PIP Framework,  
31  
32 developed to enhance countries' response to pandemic influenza, has facilitated a collective  
33  
34 approach<sup>8</sup>. However, again, vaccine donation and pledging systems, as indicated under the PIP  
35  
36 Framework, have proven to be insufficient, mainly due to the lack of legal obligation to act, or  
37  
38 penalty for parties who breach conditions, as is the case of current global allocation frameworks<sup>1</sup>  
39  
40 <sup>20 24 26 30</sup>. Implementation of and adherence to global frameworks could aid the realization of fair  
41  
42 distribution and access to medicines, like the Pan American Health Organization Strategic Fund,  
43  
44 where pooled procurement is used as a mechanism to support access to essential medicines<sup>32</sup>.  
45  
46  
47  
48  
49  
50  
51  
52  
53  
54  
55  
56  
57  
58  
59  
60

1  
2  
3 *2. Financial mechanisms such as collective Advanced Purchase Agreements may favor fair*  
4  
5 *allocation*  
6

7  
8 Several of the papers reviewed warn that most COVID-19 vaccines will be purchased by, and for  
9  
10 use in, High income countries (HICs)<sup>20 22 24 30</sup>. HICs have a track-record of dominating the global  
11  
12 supply of vaccines, through greater advanced purchasing power, and their proximity to vaccine  
13  
14 manufacturing<sup>20 24</sup>. Fair vaccine allocation is hindered by the inability of a LMIC to procure or  
15  
16 negotiate access to pandemic vaccines at the same level as HICs<sup>4 30</sup>. Structural market-based  
17  
18 inequalities are embedded in the R&D of vaccines, including that vaccine manufacturing is led  
19  
20 by multi-national pharmaceutical companies who are incentivized by intellectual property rights  
21  
22 and return on investment<sup>27 33</sup>. Advance Purchase Agreements (APAs), where a party commits to  
23  
24 buy a specific number or percentage of doses prior to development, may influence equitable  
25  
26 access to vaccines, as they secure priority access for the purchaser<sup>20</sup>. Financing mechanisms,  
27  
28 such as APAs, may exacerbate or facilitate equity depending on whether they promote the  
29  
30 interests of one country or collectively for several countries, and if they include LMICs<sup>4 21 26 27 34</sup>.  
31  
32 This highlights the significance of single party contractual agreements between a funder and a  
33  
34 vaccine producer, which often lack transparency, and are critical in determining the price and  
35  
36 delivery conditions of vaccines<sup>34</sup>.  
37  
38  
39  
40  
41  
42  
43  
44

45 *3. Large-scale vaccine manufacturing and distribution can support fair allocation*  
46

47 Much of the initial funding raised for COVID-19 vaccines has been channeled towards early  
48  
49 stage research and development costs to support the identification of safe and effective vaccines.  
50  
51 However, multiple articles in this review suggest that substantial additional investment is  
52  
53 required to further global vaccine manufacturing<sup>5 21-23 31</sup>. Large-scale manufacturing and  
54  
55

1  
2  
3 distribution will facilitate equitable access by addressing scarcity challenges and increasing  
4 production. Vaccine development is intricate and to manufacture during a pandemic faces  
5 unprecedented challenges in scale and complexity. A limited number of HICs, and some MICs,  
6 have vaccine manufacturing capacity, therefore there is a disparity between countries that have  
7 the capacity to produce vaccines and those that need access to those vaccines<sup>5 21 24 28</sup>. The  
8 dependence that the world has on a limited number of countries to manufacture vaccines affects  
9 the global availability of pandemic vaccines for two reasons. Firstly, the world is unable to  
10 manufacture the quantity of vaccines demanded, and secondly, a manufacturing country has the  
11 sovereign authority over goods produced within its borders, and in cases where it is enforced,  
12 government intervention may hinder global distribution<sup>27 28</sup>. A collective global allocation  
13 framework for the collective financing of both R&D and manufacturing and the related  
14 distribution of COVID-19 vaccines, such as COVAX, offers an approach that could reduce the  
15 impact of nationalistic approaches<sup>3</sup>.  
16  
17  
18  
19  
20  
21  
22  
23  
24  
25  
26  
27  
28  
29  
30  
31  
32  
33  
34

#### 35 *4. Sharing manufacturing know-how with MICs can support supply of COVID-19 vaccines*

36 Our findings suggest that MICs with vaccine manufacturing capability can support filling the  
37 forecasted gap in international vaccine manufacturing capacity<sup>28</sup>. The Serum Institute of India is  
38 a manufacturer based in a MIC that has pledged 1 billion doses of a COVID-19 vaccine to  
39 LMICs<sup>35</sup>. Vaccine manufacturing know-how could include vaccine developers sharing  
40 intellectual property of vaccine manufacturing processes, or relaxing patent rights<sup>4 20</sup>. Given the  
41 world's limited manufacturing capacity, the use of technology transfer and pooling could help to  
42 alleviate a massive shortage of vaccines given the scale of the need<sup>23 36</sup>. Fifteen MICs have  
43 vaccine production capacity to support the global supply of vaccines (of which 12 have WHO  
44  
45  
46  
47  
48  
49  
50  
51  
52  
53  
54  
55

1  
2  
3 prequalification status)<sup>35</sup>. Technology transfer to MIC has significantly contributed to increasing  
4  
5 the global vaccine supply, through the sharing of knowledge of those who own the know-how to  
6  
7 recipient sites to enable the recipient developer to produce a vaccine that will support local  
8  
9 production. Enabling the transfer of the technology, with limited royalty payments, may facilitate  
10  
11 manufacturing in MICs<sup>23</sup>. Two noteworthy current initiatives are, firstly, the COVID-19  
12  
13 Technology Access Pool (2020), proposed by Costa Rica and adopted by WHO (endorsed by 35  
14  
15 mainly MICs and five HICs), calls for the voluntary sharing of knowledge, intellectual property,  
16  
17 and data as well as a guarantee of free access and use by WHO member countries of drugs and  
18  
19 vaccines that are developed<sup>31 37</sup>; and, secondly, the Global pandemic influenza action plan to  
20  
21 increase vaccine supply (GAP) (2006-2016), a strategy to reduce global shortages of influenza  
22  
23 and pandemic vaccines that supports technology transfer<sup>6</sup>.  
24  
25  
26  
27  
28  
29  
30

### 31 *5. Reciprocity facilitates equitable access to vaccines*

32  
33 In the context of equitable access, reciprocity is the principle of sharing benefits equally with a  
34  
35 mutual commitment between those who control the supply of vaccines and those who have a  
36  
37 right to access vaccines. The shared benefits principle is a long-standing commitment included in  
38  
39 the Global Influenza Surveillance and Response System (GISRS), where countries who  
40  
41 participated in joint infectious disease preparedness and surveillance activities, including the  
42  
43 sharing of genetic resources, benefited from the access to technologies that will facilitate the  
44  
45 management of diseases<sup>21</sup>. The articles included in this review that mentioned this issue  
46  
47 suggested that benefit sharing as a potential solution to incentivize countries to support  
48  
49 collaborative infectious disease responses and measures, and in return be granted eligibility to  
50  
51 real-time access of pandemic response products, like vaccines<sup>4 21</sup>. The principle of countries  
52  
53  
54  
55

1  
2  
3 sharing virus samples was endorsed at the World Health Assembly in 2003 where member states  
4 supported further influenza vaccine research and development (R&D) to enable the supply of  
5 medical countermeasures<sup>25</sup>. Despite such agreements there is a weariness of the reliability of  
6 commitments made by vaccine manufacturers, as there are examples of manufacturers not  
7 reserving the agreed quota of vaccine production to LMICs as stipulated under the PIP  
8 Framework<sup>4 21</sup>.

19 *6. Countries' strength in implementing vaccination programs may influence their population's*  
20 *access to vaccines*

23 The findings from this research further suggest that the ability of a country to implement a mass  
24 vaccination program is an important factor to influence equitable access<sup>1</sup>. Vaccination programs  
25 are resource intensive; to maximize the benefit of COVID-19 vaccines, and reduce waste due to  
26 improper implementation, it has been suggested that allocation frameworks should consider a  
27 country's ability to vaccinate<sup>1</sup>. Most LMICs have well-structured vaccination programs,  
28 facilitated by organizations such as UNICEF and Gavi which could support a large pandemic  
29 vaccination program. However, few LMICs routinely roll out mass seasonal influenza  
30 vaccination, and as older populations may be a prioritized group for COVID-19, this could be a  
31 liability in a COVID-19 vaccination program<sup>20</sup>. Another important aspect that is likely to  
32 facilitate the distribution of vaccines is the countries' regulatory approval and market  
33 authorization processes for vaccines<sup>20 28</sup>. Finally, although perhaps not simply nor immediately  
34 solved, though nonetheless an important issue, overall strengthening of countries' health systems  
35 will support global efforts to distribute the vaccine. This issue is also identified and prioritized in  
36 the ACT accelerator collaboration<sup>9</sup>.

## DISCUSSION

This study reviewed the literature on access to pandemic vaccines, with the aim to identify factors that can potentially influence equitable access to a COVID-19 vaccine for LMICs. We identified 13 articles that give insight into issues to consider in ensuring that all countries have equitable access to vaccines. Our results report that the following facilitators can broadly support fair allocation of vaccines: (1) collectively agreed mechanisms or frameworks that are legally binding, (2) financial mechanisms such as collective Advanced Purchase Agreements, (3) large-scale vaccine manufacturing and distribution, (5) ensuring reciprocity between countries' in their access to, and those who control vaccine distribution, and (6) strengthening implementation of vaccination programs. All of these factors have the potential to promote fairer global access to COVID-19 vaccines.

As suggested in our review findings, one of the biggest threats to the fair distribution of COVID-19 vaccines to LMICs are countries nationalistic interests and the hoarding of vaccines.

Experiences during previous pandemics loom as a threat for populations access to vaccines in LMICs; the scrutiny on the GISRS processes following H5N1 in Indonesia and the asymmetry in the distribution of pandemic vaccines for Mexico during Swine flu is an example of unfair vaccine distribution<sup>7 29 38 39</sup>. Still today, there continues to be a need for action related to equity considerations and ensuring global coordination and distribution mechanisms of vaccines for LMICs. There are several examples of threats to equitable distribution of essentials earlier in the pandemic, with countries' tendencies to control the global supply of personal protective equipment and ventilators<sup>22 40</sup>. And more recently with Israel's large investment in COVID-19

1  
2  
3 vaccines, enabling the largest proportion of a country to be vaccinated, and confusion from India  
4 about their willingness to internationally distribute vaccines manufactured in country<sup>41 42</sup>.  
5  
6  
7  
8  
9

10 Several publications in our review suggested that collectively agreed and legally binding  
11 mechanisms would likely be the basis to facilitate the fair allocation of COVID-19 vaccines  
12 between countries. Previous attempts at agreement on joint principles, such as the *Bellagio*  
13 *Statement of Principles on Social Justice and Influenza to Africa*, have not gained traction<sup>43</sup>.  
14  
15  
16  
17  
18

19 Numerous WHO resolutions endorsed by member states indicate that there is broad support the  
20 principles of equitable distribution of pandemic vaccines to all countries, however there remains  
21 uncertainty if enough governments would be willing join binding mechanisms<sup>44-48</sup>. It is unclear  
22 whether there would be any value in a new international or multilateral agreement in this area. In  
23 addition, WHO has faced questions about its authority, which was undermined during H1N1  
24 when it called for vaccine donations to LMICs. Despite this, it is the multilateral system that has  
25 the mandate to play this role, and to date has prioritized the COVAX facility<sup>20 21</sup>. In terms of the  
26 role of vaccine manufacturers as a broker for fair distribution, a recently published report cites  
27 the example of Moderna whose vaccine (approved for use in USA and the European Union),  
28 have publicly implied that vaccines will merely be prioritized and sold to countries which are  
29 able to pay by entering into APAs with HICs and setting high course-prices for low-volume  
30 deals<sup>49</sup>.  
31  
32  
33  
34  
35  
36  
37  
38  
39  
40  
41  
42  
43  
44  
45  
46  
47  
48

49 In many ways, the COVAX facility embodies the equity principles highlighted in our review and  
50 seeks to reduce the short-term barriers to access to COVID-19 vaccines discussed here. COVAX  
51 is committed to, and leading an effort to distribute 20% of doses to the member states of the  
52  
53  
54

1  
2  
3 initiative. Vaccines will be allocated between 78 HICs and 92 LMICs who have joined COVAX<sup>3</sup>  
4  
5 13 14. Co-lead by CEPI and Gavi, both organizations were established with a commitment of  
6  
7 equitable access to medicines in their ethos<sup>10 50 51</sup>. CEPI, most notably, created a vaccine  
8  
9 portfolio to which countries participating in COVAX have access. CEPI invested in 11 COVID-  
10  
11 19 vaccine candidates often in the earliest R&D phases, nine of these vaccines are still further  
12  
13 developed<sup>52 53</sup>. These beneficiaries are required to uphold CEPI's equitable access policy that  
14  
15 among other things emphasizes that vaccines should be made available for the lowest prices  
16  
17 possible to maximize access for all populations during, but also still after, an epidemic,  
18  
19 disregarding countries ability to pay<sup>51 54</sup>. However, precise wordings for access distribution are  
20  
21 determined during the contract negotiations - an analysis of published contracts and associated  
22  
23 files shows a lack of transparency, and COVAX has been criticized by civil society for  
24  
25 negotiating vaccine prices that include profit<sup>34 49</sup>.

26  
27  
28  
29  
30  
31  
32  
33 The GAVI-COVAX Advance Market Commitment (AMC) is in addition to COVAX and aims  
34  
35 to protect the interest of HICs and LMICs by using Official Development Assistance (ODA) to  
36  
37 invest in vaccines on behalf of LMICs, offering volume guarantees to specific manufacturers  
38  
39 before licensure of the vaccine candidates. It has pledged almost 1.2 of two billion doses  
40  
41 available to the 92 poorest economies<sup>55</sup>. When the vaccines are licensed and prequalified by the  
42  
43 WHO, it will purchase and distribute it equitably between participating countries<sup>56</sup>. The GAVI-  
44  
45 COVAX AMC also ensures that vaccines supplies are secured for manufacturers for countries  
46  
47 which otherwise would not be able to participate in such financing mechanisms. It remains to be  
48  
49 seen whether COVAX will be a success, but already it is an example of how the global  
50  
51  
52  
53  
54  
55  
56  
57  
58  
59  
60



1  
2  
3 community can come together to circumvent the challenges of equitable access to pandemic  
4  
5 vaccines.  
6  
7  
8  
9

10 Another key and long-term solution to equitable access highlighted in our findings is that  
11 broadening the basis of the manufacturing of vaccines. Local production facilities are critical, but  
12 it will take time to build enough of these facilities that meet the necessary quality standards in  
13 LMICs. These are therefore so far limited to 12 MICs that have WHO prequalification<sup>35</sup>. Steps  
14 are currently being taken by WHO to strengthen local production of medicines and other health  
15 technologies, with a consultation of a resolution amongst member states during December  
16 2020<sup>57</sup>. However scaling up the manufacturing of COVID-19 vaccines will likely impact on the  
17 production of other vaccines such as influenza, measles, mumps and rubella<sup>2</sup>.  
18  
19  
20  
21  
22  
23  
24  
25  
26  
27  
28  
29

30  
31 Despite the length of time it takes to build and certify vaccine manufacturing facilities, steps can  
32 be taken now to share the know-how of the manufacturing of effective vaccines, mainly through  
33 the relaxing of patent and intellectual property rights. It is argued that the management of  
34 intellectual property principles can be a strategic tool to support the affordability of availability  
35 of vaccines, and also balancing incentives for innovators<sup>34 49 58</sup>.  
36  
37  
38  
39  
40  
41  
42  
43  
44

## 45 CONCLUSION

46 The COVID-19 pandemic is unprecedented, and the simultaneous impact on the whole world has  
47 placed significant strain on the fair distribution of vaccines to all countries, which will in  
48 particular affect resource limited settings. The consequential global demand for a scarce good  
49 will take several years to resolve, until vaccine production meets the global demand. This  
50  
51  
52  
53  
54

1  
2  
3 scoping review provides valuable insights from the past, many of which are pertinent today, at a  
4  
5 time when there is scarce evidence or examples of equitable distribution of pandemic vaccines.  
6  
7  
8  
9

10 Through this scoping review, vaccine manufacturing was deemed to be of the high importance in  
11  
12 the supply of vaccines, future scoping reviews could explore factors related to vaccine  
13  
14 manufacturing in MICs to facilitate vaccine supply in a pandemic, including questions related to  
15  
16 intellectual property. Another issue discussed in the literature, but beyond the scope of this  
17  
18 review is the role of vaccine stockpiles as a means to address urgent needs for LMIC, this was  
19  
20 deemed more relevant for the management if COVID-19 becomes endemic, but may be an  
21  
22 important issue for further research<sup>4 5 20</sup>.  
23  
24  
25  
26  
27  
28  
29  
30  
31  
32  
33  
34  
35  
36  
37  
38  
39  
40  
41  
42  
43  
44  
45  
46  
47  
48  
49  
50  
51  
52  
53  
54  
55  
56  
57  
58  
59  
60

## Article summary

### Strengths and limitations of the study

The main limitation of this scoping review is that literature was exclusively chosen based on relevance to the topic of identifying and describing factors related to equitable access, as identified in peer-reviewed journals with no additional quality assessment of the publications done (see Appendix 3 that describes the underlying basis for the papers included in the review). Moreover, in light of the numerous papers published related to the COVID-19 pandemic on a daily basis, there may be relevant publications published after our search that should have been included in this brief. The identified factors are based on empirical observations in the reviewed literature, although we applied the framework proposed by Liu et al. 2020 as a foundation for our analysis<sup>1</sup>. We followed the Preferred Reporting Items for Systematic reviews and Meta-Analyses extension for Scoping Reviews (PRISMA-ScR) and were guided by the Arksey and O'Malley's five-stage framework through the steps of the review.

### Contributor statement

Elizabeth Peacocke - Study conception, Title, abstract and full-text review, Data extraction, Data analysis, Writing.

Katrine Frønsdal - Methods, Full-text review, Data analysis, Writing.

Lieke Heupink - Data analysis, Writing.

Lumbwe Chola - Study conception, Title, abstract and full-text review, Data extraction, Data analysis, Writing.

1  
2  
3 Funding: This brief was partially funded by the Evaluation Department of the Norwegian  
4 Agency for Development Cooperation (Norad) in their role as a member of the OECD COVID-  
5  
6 19 Global Evaluation Coalition (grant number 1900737). The funders had no role in the study  
7  
8 design, data collection and analysis, decision to publish, or preparation of the manuscript.  
9  
10  
11  
12  
13

14  
15 Competing interests: All authors have completed the ICMJE uniform disclosure form at  
16  
17 [www.icmje.org/coi\\_disclosure.pdf](http://www.icmje.org/coi_disclosure.pdf) and declare no relationships or activities that could appear to  
18  
19 have influenced the submitted work.  
20  
21  
22  
23

24 Ethical approval: Was not necessary as we used published data, and did not complete primary  
25  
26 data collection.  
27  
28  
29  
30

31 Patient and public involvement: Patients were not involved in this study.  
32  
33  
34

35 Data availability statement: All data relevant to the study are included in the article or uploaded  
36  
37 as online supplementary information.  
38  
39  
40  
41

#### 42 Acknowledgements

43  
44 The following people who helped develop or offered their feedback on this brief: Marit Johansen  
45  
46 (Information Specialist), Benedikte Louise Alveberg, Tenu Avafia, Julia Bidonde, Anita Haslie,  
47  
48 Unni Gopinathan, Adam Kamradt-Scott, Ida Kristine Lindkvist, Jasper Littman, Trygve  
49  
50 Ottersen, Judit Rius Sanjuan, Ingvil Sæterdal, Christine Årdal.  
51  
52  
53  
54

1  
2  
3  
4  
5  
6  
7  
8  
9  
10  
11  
12  
13  
14  
15  
16  
17  
18  
19  
20  
21  
22  
23  
24  
25  
26  
27  
28  
29  
30  
31  
32  
33  
34  
35  
36  
37  
38  
39  
40  
41  
42  
43  
44  
45  
46  
47  
48  
49  
50  
51  
52  
53  
54  
55  
56  
57  
58  
59  
60

For peer review only

## References

1. Liu Y, Salwi S, Drolet BC. Multivalue ethical framework for fair global allocation of a COVID-19 vaccine. *J Med Ethics* 2020;46(8):499-501. doi: 10.1136/medethics-2020-106516
2. Khamsi R. If a coronavirus vaccine arrives, can the world make enough. *Nature* 2020 April 9 2020;578.
3. Gavi the Vaccine Alliance. COVAX, the act-accelerator vaccines pillar- Insuring accelerated vaccine development and manufacture: Gavi; 2020 [cited 2020 August 3]. Available from: <https://www.gavi.org/sites/default/files/covid/COVAX-Pillar-background.pdf> accessed August 3 2020.
4. Eccleston-Turner M. The pandemic influenza preparedness framework: A viable procurement option for developing states? *Medical Law International* 2017;17(4):227-48. doi: <http://dx.doi.org/10.1177/0968533217723683>
5. Fedson DS, Dunnill P. Commentary: From scarcity to abundance: pandemic vaccines and other agents for "have not" countries. *J Public Health Policy* 2007;28(3):322-40.
6. World Health Organization. Global pandemic influenza action plan to increase vaccine supply: Geneva: World Health Organization, 2006.
7. World Health Organization. Brief history of the development of the Framework on Sharing influenza viruses and access to vaccines and other benefits 2011 [cited 2020 December 15]. Available from: <https://www.who.int/influenza/pip/history/en/> accessed December 15 2020.
8. World Health Organization. Pandemic influenza preparedness framework for the sharing of influenza viruses and access to vaccines and other benefits. 2011
9. World Health Organization. The Access to COVID-19 Tools (ACT) Accelerator, 2020.

- 1  
2  
3 10. Gavi the Vaccine Alliance. About our alliance. Gavi the Vaccine Alliance,; Gavi the Vaccine  
4  
5 Alliance,, 2020.  
6
- 7  
8 11. World Health Organization. Health Topics: Health Equity 2020 [cited 2020 August 12].  
9  
10 Available from: [https://www.who.int/topics/health\\_equity/en/](https://www.who.int/topics/health_equity/en/) accessed August 12 2020.  
11
- 12 12. World Health Organization. Essential medicines and health products. Essential medicines  
13  
14 definition 2020 [cited 2020 August 13]. Available from:  
15  
16 [https://www.who.int/medicines/services/essmedicines\\_def/en/](https://www.who.int/medicines/services/essmedicines_def/en/) accessed August 13 2020.  
17
- 18 13. World Health Organization. More than 150 countries engaged in COVID-19 vaccine global  
19  
20 access facility 2020 [updated July 15 2020. Available from: [https://www.who.int/news-](https://www.who.int/news-room/detail/15-07-2020-more-than-150-countries-engaged-in-covid-19-vaccine-global-access-facility)  
21  
22 [room/detail/15-07-2020-more-than-150-countries-engaged-in-covid-19-vaccine-global-](https://www.who.int/news-room/detail/15-07-2020-more-than-150-countries-engaged-in-covid-19-vaccine-global-access-facility)  
23  
24 [access-facility.](https://www.who.int/news-room/detail/15-07-2020-more-than-150-countries-engaged-in-covid-19-vaccine-global-access-facility)  
25  
26
- 27  
28 14. World Health Organization. WHO Concept for fair access and equitable allocation of  
29  
30 COVID-19 health products: Final working version 9 September 2020. Geneva: World  
31  
32 Health Organization, 2020.  
33
- 34 15. Emanuel EJ, Persad G, Kern A, et al. An ethical framework for global vaccine allocation.  
35  
36 *Science* 2020;369(6509):1309-12.  
37
- 38 16. Herzog LM, Norheim OF, Emanuel EJ, et al. Covax must go beyond proportional allocation  
39  
40 of covid vaccines to ensure fair and equitable access. *Bmj* 2021;372  
41  
42
- 43 17. Tricco AC, Lillie E, Zarin W, et al. PRISMA extension for scoping reviews (PRISMA-ScR):  
44  
45 checklist and explanation. *Ann Intern Med* 2018;169(7):467-73.  
46  
47
- 48 18. Arksey H, O'Malley L. Scoping studies: towards a methodological framework. *International*  
49  
50 *journal of social research methodology* 2005;8(1):19-32.  
51  
52  
53  
54

- 1  
2  
3 19. Liu Y, Salwi S, Drolet B. Multivalue ethical framework for fair global allocation of a  
4  
5 COVID-19 vaccine. *J Med Ethics* 2020  
6  
7  
8 20. Kamradt-Scott A, Lee K. The 2011 Pandemic Influenza Preparedness Framework: Global  
9  
10 Health Secured or a Missed Opportunity? *Political Studies* 2011;59(4):831-47. doi:  
11  
12 10.1111/j.1467-9248.2011.00926.x  
13  
14  
15 21. Bollyky TJ, Gostin LO, Hamburg MA. The Equitable Distribution of COVID-19  
16  
17 Therapeutics and Vaccines. *Jama* 2020;07:07. doi:  
18  
19 <https://dx.doi.org/10.1001/jama.2020.6641>  
20  
21  
22 22. Yamey G, Schäferhoff M, Hatchett R, et al. Ensuring global access to COVID-19 vaccines.  
23  
24 *Lancet (London, England)* 2020;395(10234):1405-06. doi: 10.1016/s0140-6736(20)30763-7  
25  
26  
27 23. The Lancet Editorial. Global governance for COVID-19 vaccines. *Lancet (London, England)*  
28  
29 2020;395(10241):1883. doi: 10.1016/s0140-6736(20)31405-7  
30  
31  
32 24. Fidler DP. Negotiating Equitable Access to Influenza Vaccines: Global Health Diplomacy  
33  
34 and the Controversies Surrounding Avian Influenza H5N1 and Pandemic Influenza H1N1.  
35  
36 *Plos Medicine* 2010;7(5) doi: 10.1371/journal.pmed.1000247  
37  
38  
39 25. WHA56.19 Prevention and control of influenza pandemics and annual epidemics. Resolution  
40  
41 of the Fifty-Sixth World Health Assembly Tenth plenary meeting; 2003.  
42  
43  
44 26. Rourke MF. Access by Design, Benefits if Convenient: A Closer Look at the Pandemic  
45  
46 Influenza Preparedness Framework's Standard Material Transfer Agreements. *Milbank Q*  
47  
48 2019;97(1):91-112. doi: <https://dx.doi.org/10.1111/1468-0009.12364>  
49  
50  
51 27. Fedson DS. Pandemic influenza and the global vaccine supply. *Clin Infect Dis*  
52  
53 2003;36(12):1552-61.  
54  
55  
56  
57  
58  
59  
60



- 1  
2  
3 28. Fedson DS. Preparing for pandemic vaccination: an international policy agenda for vaccine  
4 development. *J Public Health Policy* 2005;26(1):4-29.  
5  
6  
7  
8 29. Fidler DP. Negotiating equitable access to influenza vaccines: global health diplomacy and  
9 the controversies surrounding avian influenza H5N1 and pandemic influenza H1N1. *PLoS*  
10 *Med* 2010;7(5):e1000247. doi: <https://dx.doi.org/10.1371/journal.pmed.1000247>  
11  
12  
13  
14 30. Turner M. Vaccine procurement during an influenza pandemic and the role of Advance  
15 Purchase Agreements: Lessons from 2009-H1N1. *Glob Public Health* 2016;11(3):322-35.  
16  
17 doi: <https://dx.doi.org/10.1080/17441692.2015.1043743>  
18  
19  
20  
21 31. Usher AD. COVID-19 vaccines for all? *Lancet (London, England)* 2020;395(10240):1822-  
22 23. doi: 10.1016/s0140-6736(20)31354-4  
23  
24  
25  
26 32. Pan American Health Organization. PAHO Strategic Fund: Pan American Health  
27 Organization,; 2020 [cited 2020 13 October]. Available from:  
28 <https://www.paho.org/en/paho-strategic-fund> accessed 13 October 2020.  
29  
30  
31  
32  
33 33. World Health Organization. Promoting access to medical technologies and innovation:  
34 intersections between public health, intellectual property and trade: World Health  
35 Organization 2020.  
36  
37  
38  
39  
40 34. Phelan AL, Eccleston-Turner M, Rourke M, et al. Legal agreements: barriers and enablers to  
41 global equitable COVID-19 vaccine access. *The Lancet* 2020  
42  
43  
44  
45 35. Jadhav S, Gautam M, Gairola S. Role of vaccine manufacturers in developing countries  
46 towards global healthcare by providing quality vaccines at affordable prices. *Clinical*  
47 *Microbiology and Infection* 2014;20:37-44.  
48  
49  
50  
51 36. World Health Organization. COVID-19 Technology Access Pool launch. In: World Health  
52 Organization, ed. Geneva, 2020.  
53  
54  
55

- 1  
2  
3 37. World Health Organization. Endorsements of the Solidarity Call to Action 2020 [cited 2020  
4  
5 September 23]. Available from: [https://www.who.int/emergencies/diseases/novel-  
10  
11 coronavirus-2019/global-research-on-novel-coronavirus-2019-ncov/covid-19-technology-  
12  
13 access-pool/endorsements-of-the-solidarity-call-to-action](https://www.who.int/emergencies/diseases/novel-<br/>6<br/>7 coronavirus-2019/global-research-on-novel-coronavirus-2019-ncov/covid-19-technology-<br/>8<br/>9 access-pool/endorsements-of-the-solidarity-call-to-action) accessed September 24 2020.
- 14 38. Fidler DP. Negotiating equitable access to influenza vaccines: global health diplomacy and  
15 the controversies surrounding avian influenza H5N1 and pandemic influenza H1N1.  
16 Negotiating and Navigating Global Health: Case Studies in Global Health Diplomacy:  
17 World Scientific 2012:161-72.
- 18 39. Jefferies N. Levelling the playing field? Sharing of influenza viruses and access to vaccines  
19 and other benefits. *Journal of Law and Medicine* 2012;20(1):59-72.
- 20 40. Jakes L. U.S. Limits Virus Aid for Masks, Gloves and Other Medical Gear Abroad New  
21 York2020 [updated June 9 2020. Available from:  
22  
23 [https://www.nytimes.com/2020/06/09/us/politics/coronavirus-international-aid-  
26  
27 masks.html2020](https://www.nytimes.com/2020/06/09/us/politics/coronavirus-international-aid-<br/>24<br/>25 masks.html2020).
- 28 41. Coronavirus: Israel leads vaccine race with 12% given jab. *BBC* 2021 January 3 2021.
- 29 42. Biswas S. Coronavirus: India to export Covid vaccines 'within weeks'. *BBC* 2021 January 5  
30  
31 2021.
- 32 43. Muula AS. How relevant is Bellagio statement of principles on social justice and influenza to  
33  
34 Africa? *Croat Med J* 2007;48(5):752-54.
- 35 44. Resolution WHA. WHA70.3 COVID-19 response. *Seventy-Third World Health Assembly 18*  
36  
37  
38  
39  
40  
41  
42  
43  
44  
45  
46  
47  
48  
49  
50  
51  
52  
53  
54  
55  
56  
57  
58  
59  
60  
May 2020 2020

- 1  
2  
3 45. Resolution WHA. WHA67. 21. Access to biotherapeutic products including similar  
4  
5 biotherapeutics products and ensuring their quality, safety and efficacy. *Sixty-Seventh World*  
6  
7 *Health Assembly* 2014  
8  
9
- 10 46. Resolution WHA. WHA67.22 Access to essential medicines. *Sixty-seventh World Health*  
11  
12 *Assembly* 2014  
13
- 14 47. Resolution WHA. WHA 61.21. Global strategy and plan of action on public health,  
15  
16 innovation and intellectual property. *61st World Health Assembly, Geneva, 19-24 May 2008*  
17  
18 2008  
19  
20
- 21 48. Resolution WHA. WHA65.17 Global vaccine action plan. *65th World Health Assembly,*  
22  
23 *Geneva, 26 May 2012* 2012  
24  
25
- 26 49. Rizvi Z. COVAX's choices. Washington D.C.: Public Citizen,, 2020.  
27
- 28 50. Huneycutt B, Lurie N, Rotenberg S, et al. Finding equipoise: CEPI revises its equitable  
29  
30 access policy. *Vaccine* 2020;38(9):2144-48.  
31  
32
- 33 51. Coalition for Epidemic Preparedness Innovations. CEPI Policy Documentation: Equitable  
34  
35 access policy 2017 [updated 2017. Available from:  
36  
37 [https://msfaccess.org/sites/default/files/2018-09/CEPIoriginalPolicy\\_2017.pdf](https://msfaccess.org/sites/default/files/2018-09/CEPIoriginalPolicy_2017.pdf) accessed  
38  
39 December 17 2020.  
40  
41
- 42 52. Coalition for Epidemic Preparedness Innovations. Enabling Equitable Access to COVID-19  
43  
44 Vaccines: Summary of equitable access provisions in CEPI's COVID-19 vaccine  
45  
46 development agreements 2020 [cited 2021 January 11 ]. Available from: [https://cepi.net/wp-](https://cepi.net/wp-content/uploads/2020/12/Enabling-equitable-access-to-COVID19-vaccines-v1-17Dec2020.pdf)  
47  
48 [content/uploads/2020/12/Enabling-equitable-access-to-COVID19-vaccines-v1-](https://cepi.net/wp-content/uploads/2020/12/Enabling-equitable-access-to-COVID19-vaccines-v1-17Dec2020.pdf)  
49  
50 [17Dec2020.pdf](https://cepi.net/wp-content/uploads/2020/12/Enabling-equitable-access-to-COVID19-vaccines-v1-17Dec2020.pdf) accessed January 11 2021.  
51  
52  
53  
54  
55

- 1  
2  
3 53. Coalition for Epidemic Preparedness Innovations. Enabling Equitable Access to COVID-19  
4  
5 Vaccines: Summary of equitable access provisions in CEPI's COVID-19 vaccine  
6  
7 development agreements 2020 [updated December 17 2020 Available from:  
8  
9 [https://cepi.net/news\\_cepi/cepi-partners-with-biological-e-limited-to-advance-development-](https://cepi.net/news_cepi/cepi-partners-with-biological-e-limited-to-advance-development-and-manufacture-of-covid-19-vaccine-candidate/)  
10  
11 [and-manufacture-of-covid-19-vaccine-candidate/](https://cepi.net/news_cepi/cepi-partners-with-biological-e-limited-to-advance-development-and-manufacture-of-covid-19-vaccine-candidate/) accessed January 12 2021.  
12  
13  
14  
15 54. Coalition for Epidemic Preparedness Innovations. Equitable Access Policy - 2019 Also  
16  
17 Coalition for Epidemic Preparedness Innovations,; 2019 [cited 2020 23 July]. Available  
18  
19 from: <https://cepi.net/wp-content/uploads/2019/01/Equitable-Access-Policy.pdf> accessed 23  
20  
21 July 2020.  
22  
23  
24 55. Fletcher ER. Two Billion Doses Secured For COVAX Vaccine Facility – Distribution Will  
25  
26 Begin in First Quarter 2021 To High Risk Groups in Low- And Middle-Income Countries.  
27  
28 *Health Policy Watch* 2020 December 18.  
29  
30  
31 56. Gavi the Vaccine Alliance. The GAVI COVAX AMC: An investment opportunity. In:  
32  
33 GAVI, ed., 2020.  
34  
35  
36 57. World Health Organization. Public health, innovation, intellectual property and trade: Local  
37  
38 production 2020 [cited 2020 December 17]. Available from:  
39  
40 [https://www.who.int/phi/implementation/tech\\_transfer/local\\_production\\_overview/en/](https://www.who.int/phi/implementation/tech_transfer/local_production_overview/en/)  
41  
42 accessed December 17 2020.  
43  
44  
45 58. Gopinathan U, Peacocke E, Gouglas D, et al. R&D for Emerging Infectious Diseases of  
46  
47 Epidemic Potential: Sharing Risks and Benefits Through a New Coalition. *Infectious*  
48  
49 *Diseases in the New Millennium*: Springer 2020:137-65.  
50  
51  
52  
53  
54  
55  
56  
57  
58  
59  
60

1  
2  
3  
4  
5  
6  
7  
8  
9  
10  
11  
12  
13  
14  
15  
16  
17  
18  
19  
20  
21  
22  
23  
24  
25  
26  
27  
28  
29  
30  
31  
32  
33  
34  
35  
36  
37  
38  
39  
40  
41  
42  
43  
44  
45  
46  
47  
48  
49  
50  
51  
52  
53  
54  
55  
56  
57  
58  
59  
60

**Figure legends**

[Insert Figure Legends here]

For peer review only

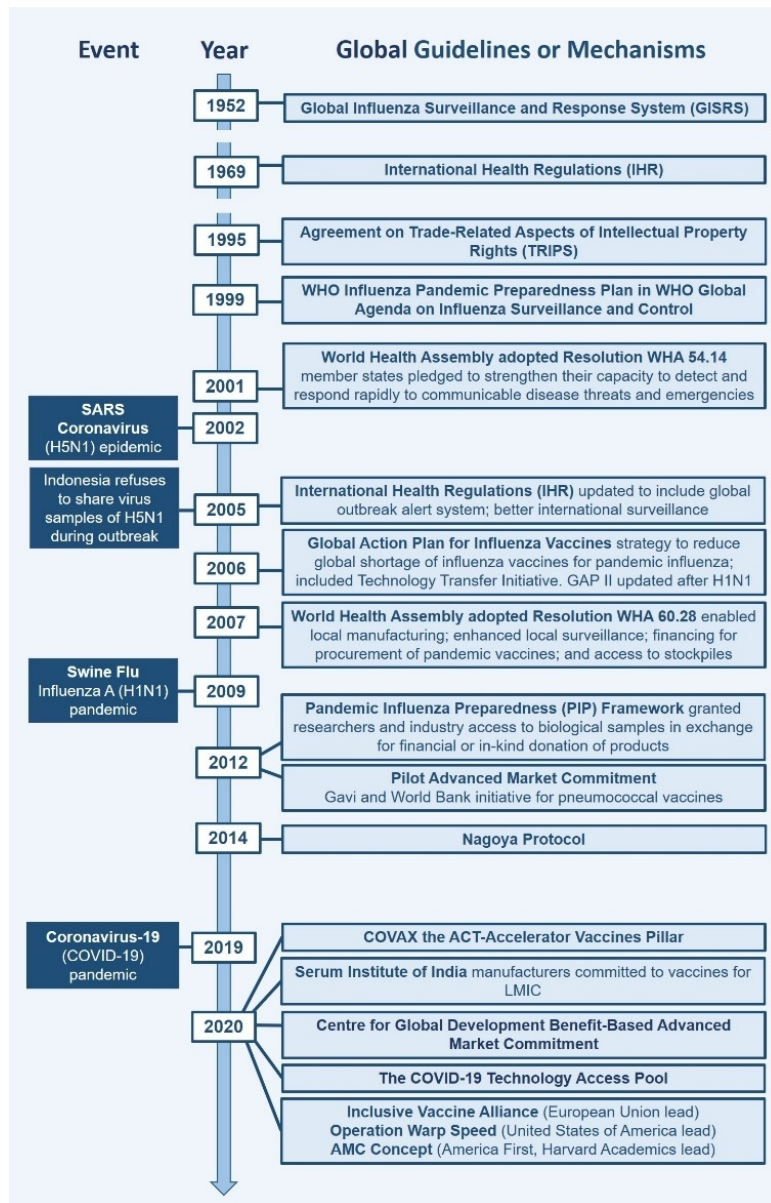

147x228mm (130 x 130 DPI)

1  
2  
3  
4  
5  
6  
7  
8  
9  
10  
11  
12  
13  
14  
15  
16  
17  
18  
19  
20  
21  
22  
23  
24  
25  
26  
27  
28  
29  
30  
31  
32  
33  
34  
35  
36  
37  
38  
39  
40  
41  
42  
43  
44  
45  
46  
47  
48  
49  
50  
51  
52  
53  
54  
55  
56  
57  
58  
59  
60

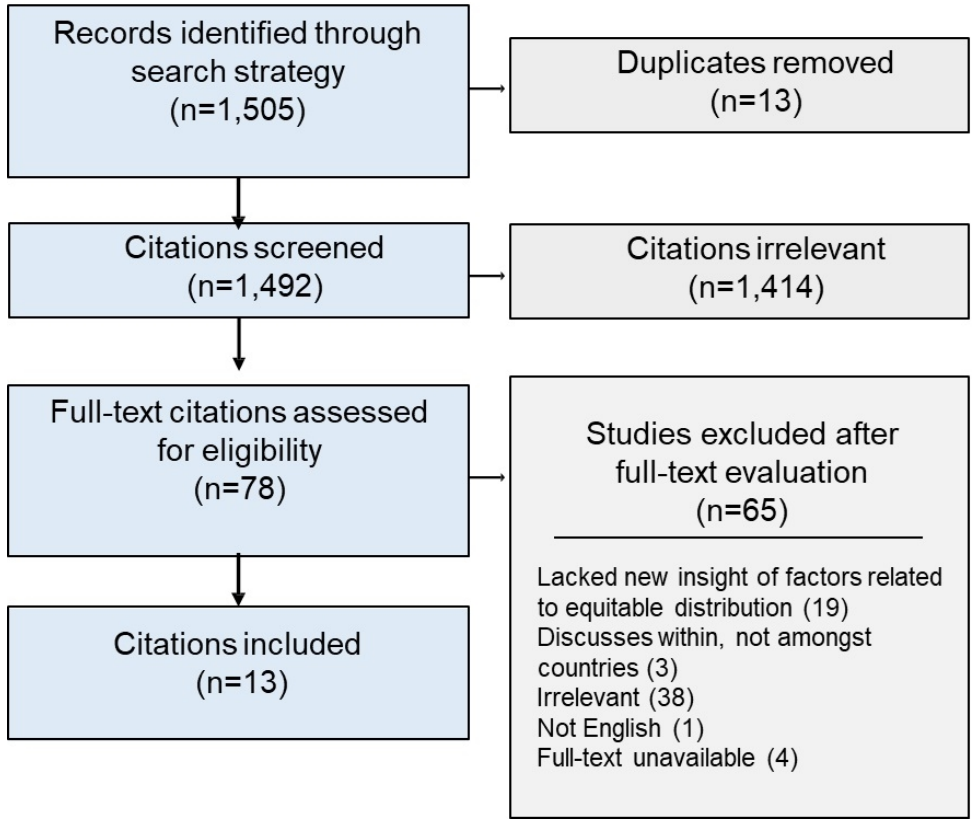

178x145mm (130 x 130 DPI)

## Supplementary Material

**Appendix 1: Search strategies for each of the four databases****MEDLINE, PubMed (searched 28.08.2020)**

MeSH: "COVID-19 vaccine" [Supplementary Concept]

Ovid MEDLINE(R) and Epub Ahead of Print, In-Process &amp; Other Non-Indexed Citations and Daily 1946 to August 27, 2020 (searched 28.08.2020)

| #  | Searches                                                                                                                                                                     | Results |
|----|------------------------------------------------------------------------------------------------------------------------------------------------------------------------------|---------|
| 1  | Coronavirus/                                                                                                                                                                 | 3244    |
| 2  | Betacoronavirus/                                                                                                                                                             | 16530   |
| 3  | Coronavirus Infections/                                                                                                                                                      | 24138   |
| 4  | Coronaviridae Infections/                                                                                                                                                    | 906     |
| 5  | Severe Acute Respiratory Syndrome/                                                                                                                                           | 4873    |
| 6  | Pandemics/                                                                                                                                                                   | 24349   |
| 7  | (COVID-19 or COVID 19 or COVID19 or 2019-nCoV or SARS2 or SARS-CoV or SARS-CoV-2 or SARS-Cov-19 or coronavirus* or corona or pandemic?).ti,ab,kf.                            | 91205   |
| 8  | (BNT162 or BNT-162 or mRNA-1273 or mRNA1273 or INO-4800 or INO4800 or ChAdOx1 or Ad5-nCoV).ti,ab,kf,hw.                                                                      | 51      |
| 9  | or/1-8                                                                                                                                                                       | 97109   |
| 10 | Vaccines/                                                                                                                                                                    | 21690   |
| 11 | Viral Vaccines/                                                                                                                                                              | 25884   |
| 12 | Vaccination/                                                                                                                                                                 | 81687   |
| 13 | Vaccination Coverage/                                                                                                                                                        | 1160    |
| 14 | Mass Vaccination/                                                                                                                                                            | 3038    |
| 15 | Immunization/                                                                                                                                                                | 50752   |
| 16 | Immunization Programs/                                                                                                                                                       | 10877   |
| 17 | (vaccin* or immuni*).ti,ab,kf.                                                                                                                                               | 546309  |
| 18 | or/10-17                                                                                                                                                                     | 579947  |
| 19 | "Delivery of Health Care"/                                                                                                                                                   | 91173   |
| 20 | "Health Services Needs and Demand"/                                                                                                                                          | 53044   |
| 21 | Resource Allocation/                                                                                                                                                         | 8501    |
| 22 | Health Care Rationing/                                                                                                                                                       | 11514   |
| 23 | Health Services Accessibility/                                                                                                                                               | 74764   |
| 24 | Health Equity/                                                                                                                                                               | 1291    |
| 25 | Right to Health/                                                                                                                                                             | 75      |
| 26 | Universal Health Care/                                                                                                                                                       | 80      |
| 27 | Healthcare Disparities/                                                                                                                                                      | 17030   |
| 28 | Socioeconomic Factors/                                                                                                                                                       | 157123  |
| 29 | Social Justice/                                                                                                                                                              | 12160   |
| 30 | Global Health/                                                                                                                                                               | 47402   |
| 31 | Human Rights/                                                                                                                                                                | 14384   |
| 32 | ((equit* or equal* or fair* or inequit* or unequal or unfair* or global*) adj3 (access* or allocat* or distribut* or deliver* or provision or supply or supplies)).ti,ab,kf. | 29976   |
| 33 | (right to health* or universal health*).ti,ab,kf.                                                                                                                            | 7053    |
| 34 | ((health* or health care) adj (rationing or disparities)).ti,ab,kf.                                                                                                          | 13345   |
| 35 | or/19-34                                                                                                                                                                     | 466021  |
| 36 | 9 and 18 and 35                                                                                                                                                              | 632     |

**Embase 1974 to 2020 Week 34, Ovid (searched 28.08.2020)**

| # | Searches                                                                                                                                    | Results |
|---|---------------------------------------------------------------------------------------------------------------------------------------------|---------|
| 1 | coronavirinae/                                                                                                                              | 2268    |
| 2 | betacoronavirus/                                                                                                                            | 4632    |
| 3 | coronavirus infection/                                                                                                                      | 8485    |
| 4 | coronaviridae infection/                                                                                                                    | 166     |
| 5 | pandemic/                                                                                                                                   | 30028   |
| 6 | (COVID-19 or COVID 19 or COVID19 or 2019-nCoV or SARS2 or SARS-CoV or SARS-CoV-2 or SARS-Cov-19 or coronavirus* or corona or pandemic?).mp. | 103695  |



|    |                                                                                                                                                                                 |        |
|----|---------------------------------------------------------------------------------------------------------------------------------------------------------------------------------|--------|
| 7  | (BNT162 or BNT-162 or mRNA-1273 or mRNA1273 or INO-4800 or INO4800 or ChAdOx1 or Ad5-nCoV).mp.                                                                                  | 85     |
| 8  | or/1-7                                                                                                                                                                          | 103962 |
| 9  | vaccine/                                                                                                                                                                        | 60026  |
| 10 | virus vaccine/                                                                                                                                                                  | 19609  |
| 11 | severe acute respiratory syndrome vaccine/                                                                                                                                      | 385    |
| 12 | vaccination/                                                                                                                                                                    | 140276 |
| 13 | vaccination coverage/                                                                                                                                                           | 2060   |
| 14 | immunization/                                                                                                                                                                   | 94131  |
| 15 | mass immunization/                                                                                                                                                              | 3511   |
| 16 | (vaccin* or immuni*).ti,ab,kw,ot.                                                                                                                                               | 643022 |
| 17 | or/9-16                                                                                                                                                                         | 689815 |
| 18 | health care delivery/                                                                                                                                                           | 174154 |
| 19 | resource management/                                                                                                                                                            | 10271  |
| 20 | resource allocation/                                                                                                                                                            | 20867  |
| 21 | health care access/                                                                                                                                                             | 62445  |
| 22 | health care quality/                                                                                                                                                            | 241073 |
| 23 | health equity/                                                                                                                                                                  | 3269   |
| 24 | right to health/                                                                                                                                                                | 105    |
| 25 | universal health care/                                                                                                                                                          | 155    |
| 26 | health care disparity/                                                                                                                                                          | 15646  |
| 27 | socioeconomics/                                                                                                                                                                 | 140163 |
| 28 | social justice/                                                                                                                                                                 | 10427  |
| 29 | global health/                                                                                                                                                                  | 9804   |
| 30 | human rights/                                                                                                                                                                   | 24894  |
| 31 | ((equit* or equal* or fair* or inequit* or unequal or unfair* or global*) adj3 (access* or allocat* or distribut* or deliver* or provision or supply or supplies)).ti,ab,kw,ot. | 38602  |
| 32 | (right to health* or universal health*).ti,ab,kw,ot.                                                                                                                            | 8082   |
| 33 | ((health* or health care) adj (rationing or disparities)).ti,ab,kw,ot.                                                                                                          | 16415  |
| 34 | or/18-33                                                                                                                                                                        | 670545 |
| 35 | 8 and 17 and 34                                                                                                                                                                 | 672    |
| 36 | limit 35 to (conference abstracts or embase)                                                                                                                                    | 529    |

#### Global Index Medicus, WHO (searched 28.08.2020)

Advanced search in Title, abstract, subject  
 COVID-19 OR "COVID 19" OR COVID19 OR 2019-nCoV OR "2019 nCoV" OR SARS2 OR SARS-CoV  
 OR "SARS CoV" OR SARS-CoV-2 OR "SARS CoV 2" OR SARS-Cov-19 OR "SARS Cov 19" OR  
 coronavirus OR corona OR pandemic OR pandemics  
 AND  
 vaccine OR vaccines OR vaccination OR immunization OR immunisation  
 AND  
 equity OR equitable OR equal OR equally OR inequity OR inequitable OR unequal OR unequally OR  
 unfair OR unfairly OR disparity OR disparities OR global OR globally

#### Web of Science, Clarivate Analytics (searched 28.08.2020)

COVID-19 OR "COVID 19" OR COVID19 OR 2019-nCoV OR "2019 nCoV" OR SARS2 OR SARS-CoV  
 OR "SARS CoV" OR SARS-CoV-2 OR "SARS CoV 2" OR SARS-Cov-19 OR "SARS Cov 19" OR  
 coronavirus OR corona OR pandemic OR pandemics  
 AND  
 vaccin\* OR immuni\*  
 AND  
 equity OR equitable OR equal OR equally OR inequity OR inequitable OR unequal OR unequally OR  
 unfair OR unfairly OR "right to health" OR "right to healthcare" OR "universal health" OR "universal  
 healthcare" OR "healthcare rationing" OR "health care rationing" OR "healthcare disparity" OR "healthcare  
 disparity" OR "healthcare disparities" OR "healthcare disparities"

## Appendix 2: Excluded articles and reason for exclusion

**Reason for exclusion key:** 1: mentions issue but lacks detail or did not add new insight to factors related to equitable access, 2: discusses within, not amongst countries, 3: irrelevant, 4: not English, 5: full-text unavailable.

| Author                                                                                                        | Title                                                                                                                                                                                 | Year | Reason |
|---------------------------------------------------------------------------------------------------------------|---------------------------------------------------------------------------------------------------------------------------------------------------------------------------------------|------|--------|
| Hay, A. J. and J. W. McCauley                                                                                 | The WHO global influenza surveillance and response system (GISRS)-A future perspective                                                                                                | 2018 | 1      |
| Bennett, B. and T. Carney                                                                                     | Law, ethics and pandemic preparedness: the importance of cross-jurisdictional and cross-cultural perspectives                                                                         | 2010 | 1      |
| Fisher, D., D. S. Hui, Z. Gao, C. Lee, M. D. Oh, B. Cao, T. T. Hien, K. Patlovich and J. Farrar               | Pandemic response lessons from influenza H1N1 2009 in Asia                                                                                                                            | 2011 | 1      |
| Friede, M., L. Palkonyay, C. Alfonso, Y. Pervikov, G. Torelli, D. Wood and M. P. Kieny                        | WHO initiative to increase global and equitable access to influenza vaccine in the event of a pandemic: supporting developing country production capacity through technology transfer | 2011 | 1      |
| Hessel, L.                                                                                                    | Pandemic influenza vaccines: Meeting the supply, distribution and deployment challenges                                                                                               | 2009 | 1      |
| Ho, A. and I. Dascalu                                                                                         | Global Disparity and Solidarity in a Pandemic                                                                                                                                         | 2020 | 1      |
| Haaheim, L. R., A. S. Madhun and R. Cox                                                                       | Pandemic influenza vaccines - the challenges                                                                                                                                          | 2009 | 1      |
| Kamradt-Scott, A.                                                                                             | Evidence-based medicine and the governance of pandemic influenza                                                                                                                      | 2012 | 1      |
| Megiddo, I., J. Nonvignon, R. Owusu, K. Chalkidou, A. Colson, M. Gad, P. Klepac, F. Ruiz and A. Morton        | Fairer financing of vaccines in a world living with COVID-19                                                                                                                          | 2020 | 1      |
| Milstien, J.                                                                                                  | Emergency response vaccines: Lessons learned in response to communicable diseases                                                                                                     | 2003 | 1      |
| Nannei, C., S. Goldin, G. Torelli, H. Fatima, K. Kumar, O. Bubb-Humfries, B. Stenson and E. Sparrow           | Stakeholders' perceptions of 10years of the Global Action Plan for Influenza Vaccines (GAP) - Results from a survey                                                                   | 2016 | 1      |
| Muula, A. S.                                                                                                  | How relevant is Bellagio statement of principles on social justice and influenza to Africa?                                                                                           | 2007 | 2      |
| Ogbogu, U. and L. Hardcastle                                                                                  | Bioethics and practical justice in the post-COVID-19 era                                                                                                                              | 2020 | 1      |
| Rodríguez Mega, E.                                                                                            | Latin American scientists join the coronavirus vaccine race: 'No one's coming to rescue us'                                                                                           | 2020 | 1      |
| Ropero-Alvarez, A. M., A. Whittembury, H. J. Kurtis, T. dos Santos, M. C. Danovaro-Holliday and C. Ruiz-Matus | Pandemic influenza vaccination: lessons learned from Latin America and the Caribbean                                                                                                  | 2012 | 1      |
| Schwartz, B. and W. A. Orenstein                                                                              | Prioritization of pandemic influenza vaccine: Rationale and strategy for decision making                                                                                              | 2009 | 1      |
| Yamada, T.                                                                                                    | Poverty, wealth, and access to pandemic influenza vaccines                                                                                                                            | 2009 | 1      |

|    |                                                                                                                                  |                                                                                                                       |      |   |
|----|----------------------------------------------------------------------------------------------------------------------------------|-----------------------------------------------------------------------------------------------------------------------|------|---|
| 1  |                                                                                                                                  |                                                                                                                       |      |   |
| 2  |                                                                                                                                  |                                                                                                                       |      |   |
| 3  | Yen, C., T. B. Hyde, A. J. Costa, K. Fernandez, J. S. Tam, S. Hugonnet, A. M. Huvos, P. Duclos, V. J. Dietz and B. T. Burkholder | The development of global vaccine stockpiles                                                                          | 2015 | 1 |
| 4  |                                                                                                                                  |                                                                                                                       |      |   |
| 5  | Zimmerman, R. K.                                                                                                                 | Rationing of influenza vaccine during a pandemic: ethical analyses                                                    | 2007 | 1 |
| 6  |                                                                                                                                  |                                                                                                                       |      |   |
| 7  | Bell, L., L. Peters, J. D. Heffelfinger, S. G. Sullivan, A. Vilajeliu, J. Shin, J. Bresee and E. Dueger                          | Preparedness for influenza vaccination during a pandemic in the World Health Organization Western Pacific Region      | 2018 | 2 |
| 8  |                                                                                                                                  |                                                                                                                       |      |   |
| 9  | Edwards, K. M., A. Sabow, A. Pasternak and J. W. Boslego                                                                         | Strategies for broad global access to pandemic influenza vaccines                                                     | 2009 | 2 |
| 10 |                                                                                                                                  |                                                                                                                       |      |   |
| 11 | Hadler, J. L.                                                                                                                    | Public health strategies for distribution of influenza vaccine during an influenza pandemic                           | 2005 | 2 |
| 12 |                                                                                                                                  |                                                                                                                       |      |   |
| 13 | Bhatia, P.                                                                                                                       | The H1N1 influenza pandemic: need for solutions to ethical problems                                                   | 2013 | 3 |
| 14 |                                                                                                                                  |                                                                                                                       |      |   |
| 15 | Billington, J., I. Deschamps, S. C. Erck, J. L. Gerberding, E. Hanon, S. Ivol, J. W. Shiver, J. A. Spencer and J. Van Hoof       | Developing Vaccines for SARS-CoV-2 and Future Epidemics and Pandemics: Applying Lessons from Past Outbreaks           | 2020 | 3 |
| 16 |                                                                                                                                  |                                                                                                                       |      |   |
| 17 | Briand, S.                                                                                                                       | Future developments in global influenza surveillance                                                                  | 2010 | 3 |
| 18 |                                                                                                                                  |                                                                                                                       |      |   |
| 19 | Elbe, S.                                                                                                                         | Haggling over viruses: the downside risks of securitizing infectious disease                                          | 2010 | 3 |
| 20 |                                                                                                                                  |                                                                                                                       |      |   |
| 21 | Eurosurveillance editorial, t.                                                                                                   | Agreement on a pandemic influenza preparedness framework for the sharing of viruses and benefit sharing               | 2011 | 3 |
| 22 |                                                                                                                                  |                                                                                                                       |      |   |
| 23 | Fedson, D. S.                                                                                                                    | Vaccine development for an imminent pandemic: why we should worry, what we must do                                    | 2006 | 3 |
| 24 |                                                                                                                                  |                                                                                                                       |      |   |
| 25 | Gostin, L. O.                                                                                                                    | Medical countermeasures for pandemic influenza: ethics and the law                                                    | 2006 | 3 |
| 26 |                                                                                                                                  |                                                                                                                       |      |   |
| 27 | Gronvall, G. K. and L. L. Borio                                                                                                  | Removing barriers to global pandemic influenza vaccination                                                            | 2006 | 3 |
| 28 |                                                                                                                                  |                                                                                                                       |      |   |
| 29 | Guerin, P. J., S. Singh-Phulgenda and N. Strub-Wourgaft                                                                          | The consequence of COVID-19 on the global supply of medical products: Why Indian generics matter for the world?       | 2020 | 3 |
| 30 |                                                                                                                                  |                                                                                                                       |      |   |
| 31 | Hendriks, J., M. Holleman, O. de Boer, P. de Jong and W. Luytjes                                                                 | An international technology platform for influenza vaccines                                                           | 2011 | 3 |
| 32 |                                                                                                                                  |                                                                                                                       |      |   |
| 33 | Henn, W.                                                                                                                         | Allocation criteria for an initial shortage of a future SARS-CoV-2 vaccine and necessary measures for global immunity | 2020 | 3 |
| 34 |                                                                                                                                  |                                                                                                                       |      |   |
| 35 | Huneycutt, B., N. Lurie, S. Rotenberg, R. Wilder and R. Hatchett                                                                 | Finding equipoise: CEPI revises its equitable access policy                                                           | 2020 | 3 |
| 36 |                                                                                                                                  |                                                                                                                       |      |   |
| 37 | Haaheim, L. R.                                                                                                                   | Vaccines for an influenza pandemic: scientific and political challenges                                               | 2007 | 3 |
| 38 |                                                                                                                                  |                                                                                                                       |      |   |
| 39 | Kamradt-Scott, A.                                                                                                                | The politics of medicine and the global governance of pandemic influenza                                              | 2013 | 3 |
| 40 |                                                                                                                                  |                                                                                                                       |      |   |
| 41 | Karim, S. A.                                                                                                                     | COVID-19 vaccine affordability and accessibility                                                                      | 2020 | 3 |
| 42 |                                                                                                                                  |                                                                                                                       |      |   |
| 43 | Kelley, M., R. A. Ferrand, K. Muraya, S. Chigudu, S. Molyneux, M. Pai and E. Barasa                                              | An appeal for practical social justice in the COVID-19 global response in low-income and middle-income countries      | 2020 | 3 |
| 44 |                                                                                                                                  |                                                                                                                       |      |   |
| 45 |                                                                                                                                  |                                                                                                                       |      |   |
| 46 |                                                                                                                                  |                                                                                                                       |      |   |

|    |                                                                                                                |                                                                                                                                                      |      |   |
|----|----------------------------------------------------------------------------------------------------------------|------------------------------------------------------------------------------------------------------------------------------------------------------|------|---|
| 1  |                                                                                                                |                                                                                                                                                      |      |   |
| 2  |                                                                                                                |                                                                                                                                                      |      |   |
| 3  | Khamsi, R.                                                                                                     | If a coronavirus vaccine arrives, can the world make enough?                                                                                         | 2020 | 3 |
| 4  | Kieny, M. P.                                                                                                   | WHO supports fair access to influenza A (H1N1) vaccine                                                                                               | 2009 | 3 |
| 5  | Kyd, J. M.                                                                                                     | 3rd Global Vaccine Congress                                                                                                                          | 2010 | 3 |
| 6  | McLachlan, H. V.                                                                                               | A proposed non-consequentialist policy for the ethical distribution of scarce vaccination in the face of an influenza pandemic                       | 2012 | 3 |
| 7  | McLachlan, H. V.                                                                                               | On the random distribution of scarce doses of vaccine in response to the threat of an influenza pandemic: a response to Wardrope                     | 2015 | 3 |
| 8  |                                                                                                                |                                                                                                                                                      |      |   |
| 9  | Monto, A. S., S. Black, S. A. Plotkin and W. A. Orenstein                                                      | Response to the 2009 pandemic: effect on influenza control in wealthy and poor countries                                                             | 2011 | 3 |
| 10 |                                                                                                                |                                                                                                                                                      |      |   |
| 11 | Nguyen, T. and S. Briand                                                                                       | The influenza challenge                                                                                                                              | 2010 | 3 |
| 12 |                                                                                                                |                                                                                                                                                      |      |   |
| 13 | Pagliusi, S., M. Dennehy, H. Kim and D. A. O. Committee                                                        | Vaccines, inspiring innovation in health                                                                                                             | 2018 | 3 |
| 14 |                                                                                                                |                                                                                                                                                      |      |   |
| 15 | Palkonyay, L. and H. Fatima                                                                                    | A decade of adaptation: Regulatory contributions of the World Health Organization to the Global Action Plan for Influenza Vaccines (2006-2016)       | 2016 | 3 |
| 16 |                                                                                                                |                                                                                                                                                      |      |   |
| 17 | Ruscio, B., A. Bolster, J. Bresee, A. Abelin, P. Boutet, H. Christiansen, P. Etholm, S. ... and A. Xeuatvongsa | Shaping meeting to explore the value of a coordinated work plan for epidemic and pandemic influenza vaccine preparedness                             | 2020 | 3 |
| 18 |                                                                                                                |                                                                                                                                                      |      |   |
| 19 | Stohr, K., M. P. Kieny and D. Wood                                                                             | Influenza pandemic vaccines: How to ensure a low-cost, low-dose option                                                                               | 2006 | 3 |
| 20 |                                                                                                                |                                                                                                                                                      |      |   |
| 21 | Straetemans, M., U. Buchholz, S. Reiter, W. Haas and G. Krause                                                 | Prioritization strategies for pandemic influenza vaccine in 27 countries of the European Union and the Global Health Security Action Group: a review | 2007 | 3 |
| 22 |                                                                                                                |                                                                                                                                                      |      |   |
| 23 | Wardrope, A.                                                                                                   | Scarce vaccine supplies in an influenza pandemic should not be distributed randomly: reply to McLachlan                                              | 2012 | 3 |
| 24 |                                                                                                                |                                                                                                                                                      |      |   |
| 25 | Wynia, M. K.                                                                                                   | Ethics and public health emergencies: rationing vaccines                                                                                             | 2006 | 3 |
| 26 |                                                                                                                |                                                                                                                                                      |      |   |
| 27 | Anderson, Tatum                                                                                                | Intensifying vaccine production                                                                                                                      | 2020 | 3 |
| 28 |                                                                                                                |                                                                                                                                                      |      |   |
| 29 | Coleman, C. H.                                                                                                 | Allocating vaccines and antiviral medications during an influenza pandemic                                                                           | 2009 | 3 |
| 30 |                                                                                                                |                                                                                                                                                      |      |   |
| 31 | Lee, B. Y., S. T. Brown, R. R. Bailey, R. K. Zimmerman, M. A. Potter... and D. S. Burke                        | The Benefits To All Of Ensuring Equal And Timely Access To Influenza Vaccines In Poor Communities                                                    | 2011 | 3 |
| 32 |                                                                                                                |                                                                                                                                                      |      |   |
| 33 | Li, Y., E. B. Hsu and J. M. Links                                                                              | Healthcare system cost evaluation of antiviral stockpiling for pandemic influenza preparedness                                                       | 2010 | 3 |
| 34 |                                                                                                                |                                                                                                                                                      |      |   |
| 35 | Mukherjee, R.                                                                                                  | Global efforts on vaccines for COVID-19: Since, sooner or later, we all will catch the coronavirus                                                   | 2020 | 3 |
| 36 |                                                                                                                |                                                                                                                                                      |      |   |
| 37 | Saunders, B.                                                                                                   | EQUALITY IN THE ALLOCATION OF SCARCE VACCINES                                                                                                        | 2018 | 3 |
| 38 |                                                                                                                |                                                                                                                                                      |      |   |
| 39 | Stoto, M. A., C. Nelson, M. A. Higdon, J. Kraemer, L. Hites and C. M. Singleton                                | Lessons about the state and local public health system response to the 2009 H1N1 pandemic: a workshop summary                                        | 2013 | 3 |
| 40 |                                                                                                                |                                                                                                                                                      |      |   |
| 41 | Wong, G. and X. Qiu                                                                                            | Funding vaccines for emerging infectious diseases                                                                                                    | 2018 | 3 |
| 42 |                                                                                                                |                                                                                                                                                      |      |   |
| 43 |                                                                                                                |                                                                                                                                                      |      |   |
| 44 |                                                                                                                |                                                                                                                                                      |      |   |
| 45 |                                                                                                                |                                                                                                                                                      |      |   |
| 46 |                                                                                                                |                                                                                                                                                      |      |   |

1  
2  
3  
4  
5  
6  
7  
8  
9  
10  
11  
12  
13  
14  
15  
16  
17  
18  
19  
20  
21  
22  
23  
24  
25  
26  
27  
28  
29  
30  
31  
32  
33  
34  
35  
36  
37  
38  
39  
40  
41  
42  
43  
44  
45  
46

|                                                                                 |                                                                                                     |      |   |
|---------------------------------------------------------------------------------|-----------------------------------------------------------------------------------------------------|------|---|
| Bingzhe, L. I., L. I. Manshi, H. Jiayan, C. Yingyao and L. U. Yihan             | Expanding the pandemic influenza preparedness framework to the epidemic of COVID-19                 | 2020 | 4 |
| Collin, N. and S. Briand                                                        | [Influenza vaccine: globalization of public health stakes]                                          | 2009 | 5 |
| Donatelli, I. and F. Pregliasco                                                 | [WHO Influenza Global Agenda]                                                                       | 2003 | 5 |
| Jorgensen, P., A. Wasley, J. Mereckiene, S. Cotter, J. T. Weber and C. S. Brown | Unequal access to vaccines in the WHO European Region during the A(H1N1) influenza pandemic in 2009 | 2013 | 5 |
| Lopalco, P. L. and L. Tan                                                       | Pandemic vaccines: Are we prepared for the next pandemic?                                           | 2016 | 5 |

For peer review only

### Appendix 3: Papers underlying this brief

List of the 13 papers included in the review, including the reference, type of publication and context is shown in the table below.

| Reference                                                                                                                                                                                                               | Type       | What is the context of the paper?                                                                                                                                                                                                                     |
|-------------------------------------------------------------------------------------------------------------------------------------------------------------------------------------------------------------------------|------------|-------------------------------------------------------------------------------------------------------------------------------------------------------------------------------------------------------------------------------------------------------|
| Bollyky TJ, Gostin LO, Hamburg MA: <i>The Equitable Distribution of COVID-19 Therapeutics and Vaccines</i> . <i>Jama</i> 2020, 07:07. (1)                                                                               | Viewpoint  | Discusses experiences and suggestions for a future framework to the distribution of vaccines.                                                                                                                                                         |
| Eccleston-Turner M: <i>The pandemic influenza preparedness framework: A viable procurement option for developing states?</i> <i>Medical Law International</i> 2017, 17(4):227-248. (2)                                  | Article    | Examines the Pandemic Influenza Framework and the content of the Obligations of the Company which have been secured by the World Health Organization.                                                                                                 |
| Fedson DS: <i>Pandemic influenza and the global vaccine supply</i> . <i>Clin Infect Dis</i> 2003, 36(12):1552-1561. (3)                                                                                                 | Article    | The article explores several issues related to the global supply of vaccine during influenza pandemics                                                                                                                                                |
| Fedson DS: <i>Preparing for pandemic vaccination: an international policy agenda for vaccine development</i> . <i>J Public Health Policy</i> 2005, 26(1):4-29. (4)                                                      | Commentary | Focuses on the trivalent vaccines currently available contain inactivated viruses.                                                                                                                                                                    |
| Fedson, D. S., & Dunnill, P. (2007). <i>Commentary: from scarcity to abundance: pandemic vaccines and other agents for "have not" countries</i> . <i>Journal of Public Health Policy</i> , 28(3), 322-340. (5)          | Commentary | Discusses that access to supplies of pandemic vaccine for most countries is a problem of scarcity and how to ensure the "have not" countries will get access to pandemic vaccines.                                                                    |
| Fidler DP: <i>Negotiating Equitable Access to Influenza Vaccines: Global Health Diplomacy and the Controversies Surrounding Avian Influenza H5N1 and Pandemic Influenza H1N1</i> . <i>Plos Medicine</i> 2010, 7(5). (6) | Article    | Examines the diplomatic negotiations surrounding influenza virus sharing as an example of the core tensions characterizing multilateralism and emerging forms of global health governance.                                                            |
| Kamradt-Scott A, Lee K: <i>The 2011 Pandemic Influenza Preparedness Framework: Global Health Secured or a Missed Opportunity?</i> <i>Political Studies</i> 2011, 59(4):831-847.(7)                                      | Article    | Investigates the events that prompted the re-examination of a technical cooperation system that has provided effective global health security on influenza for 60 years, and evaluates the PIP framework.                                             |
| The Lancet: <i>Global governance for COVID-19 vaccines</i> . <i>Lancet</i> (London, England) 2020, 395(10241):1883 (8)                                                                                                  | Editorial  | Discusses the danger of a vaccine bidding war and the need for new arrangements at the global level to facilitate the development, finance, production, and equitable distribution of COVID-19 vaccines.                                              |
| Liu Y, Salwi S, Drolet BC: <i>Multivalued ethical framework for fair global allocation of a COVID-19 vaccine</i> . <i>J Med Ethics</i> 2020, 46(8):499-501. (9)                                                         | Article    | Analyses four allocation paradigms: ability to develop or purchase; reciprocity; ability to implement; and distributive justice, and synthesizes their ethical considerations to develop an allocation model to fit the COVID-19 pandemic.            |
| Rourke MF: <i>Access by Design, Benefits if Convenient: A Closer Look at the Pandemic Influenza Preparedness Framework's Standard Material</i>                                                                          | Article    | Analyses the PIP Framework, its Standard Material Transfer Agreements (SMTAs), and secondary sources to determine whether the PIP Framework will effectively function as an access and benefit-sharing (ABS) instrument during an influenza pandemic. |

1  
2  
3  
4  
5  
6  
7  
8  
9  
10  
11  
12  
13  
14  
15  
16  
17  
18  
19  
20  
21  
22  
23  
24  
25  
26  
27  
28  
29  
30  
31  
32  
33  
34  
35  
36  
37  
38  
39  
40  
41  
42  
43  
44  
45  
46  
47  
48  
49  
50  
51  
52  
53  
54  
55  
56  
57  
58  
59  
60

---

*Transfer Agreements*. Milbank Q 2019, 97(1):91-112. (10)

---

Turner M: *Vaccine procurement during an influenza pandemic and the role of Advance Purchase Agreements: Lessons from 2009-H1N1*. *Glob Public Health* 2016, 11(3):322-335. (11)

Article

A case study on the procurement of pandemic influenza vaccines during 2009-H1N1, and the likely manner in which procurement will occur during future pandemics.

Usher AD: *COVID-19 vaccines for all?* *Lancet* (London, England) 2020, 395(10240):1822-1823(12).

World report

Provides an assessment of the initiatives being planned to ensure equitable access, and their shortcomings.

Yamey G, Schäferhoff M, Hatchett R, Pate M, Zhao F, McDade KK: *Ensuring global access to COVID-19 vaccines*. *Lancet* (London, England) 2020, 395(10234):1405-1406. (13)

Comment

Discusses the development of COVID-19 vaccines as a means to be used globally to end the COVID-19 pandemic. This vaccine effort should be guided by three imperatives: speed, manufacture and deployment at scale, and global access.

## References

1. Bollyky TJ, Gostin LO, Hamburg MA. The Equitable Distribution of COVID-19 Therapeutics and Vaccines. *Jama*. 2020;07:07.
2. Eccleston-Turner M. The pandemic influenza preparedness framework: A viable procurement option for developing states? *Medical Law International*. 2017;17(4):227-48.
3. Fedson DS. Pandemic influenza and the global vaccine supply. *Clin Infect Dis*. 2003;36(12):1552-61.
4. Fedson DS. Preparing for pandemic vaccination: an international policy agenda for vaccine development. *J Public Health Policy*. 2005;26(1):4-29.
5. Fedson DS, Dunnill P. Commentary: From scarcity to abundance: pandemic vaccines and other agents for "have not" countries. *J Public Health Policy*. 2007;28(3):322-40.
6. Fidler DP. Negotiating Equitable Access to Influenza Vaccines: Global Health Diplomacy and the Controversies Surrounding Avian Influenza H5N1 and Pandemic Influenza H1N1. *Plos Medicine*. 2010;7(5).
7. Kamradt-Scott A, Lee K. The 2011 Pandemic Influenza Preparedness Framework: Global Health Secured or a Missed Opportunity? *Political Studies*. 2011;59(4):831-47.
8. The Lancet. Global governance for COVID-19 vaccines. *Lancet (London, England)*. 2020;395(10241):1883.
9. Liu Y, Salwi S, Drolet BC. Multivalued ethical framework for fair global allocation of a COVID-19 vaccine. *J Med Ethics*. 2020;46(8):499-501.
10. Rourke MF. Access by Design, Benefits if Convenient: A Closer Look at the Pandemic Influenza Preparedness Framework's Standard Material Transfer Agreements. *Milbank Q*. 2019;97(1):91-112.
11. Turner M. Vaccine procurement during an influenza pandemic and the role of Advance Purchase Agreements: Lessons from 2009-H1N1. *Glob Public Health*. 2016;11(3):322-35.
12. Usher AD. COVID-19 vaccines for all? *Lancet (London, England)*. 2020;395(10240):1822-3.
13. Yamey G, Schäferhoff M, Hatchett R, Pate M, Zhao F, McDade KK. Ensuring global access to COVID-19 vaccines. *Lancet (London, England)*. 2020;395(10234):1405-6.



# BMJ Open

## Factors Influencing Global Equitable Access to COVID-19 Vaccines for Low-and Middle-Income Countries: A Scoping Review

|                                 |                                                                                                                                                                                                                                                                                                                                                                                                                                            |
|---------------------------------|--------------------------------------------------------------------------------------------------------------------------------------------------------------------------------------------------------------------------------------------------------------------------------------------------------------------------------------------------------------------------------------------------------------------------------------------|
| Journal:                        | <i>BMJ Open</i>                                                                                                                                                                                                                                                                                                                                                                                                                            |
| Manuscript ID                   | bmjopen-2021-049505.R1                                                                                                                                                                                                                                                                                                                                                                                                                     |
| Article Type:                   | Original research                                                                                                                                                                                                                                                                                                                                                                                                                          |
| Date Submitted by the Author:   | 04-Aug-2021                                                                                                                                                                                                                                                                                                                                                                                                                                |
| Complete List of Authors:       | Peacocke, Elizabeth; Norwegian Institute of Public Health, Division for Health Services<br>Heupink, Lieke; Norwegian Institute of Public Health, Division for Health Services<br>Frønsdal, Katrine; Norwegian Institute of Public Health, Division for Health Services<br>Dahl, Elin Hoffmann; Haukeland Universitetssjukehus, Department of Medicine<br>Chola, Lumbwe; Norwegian Institute of Public Health, Division for Health Services |
| <b>Primary Subject Heading</b>: | Global health                                                                                                                                                                                                                                                                                                                                                                                                                              |
| Secondary Subject Heading:      | Health policy, Public health                                                                                                                                                                                                                                                                                                                                                                                                               |
| Keywords:                       | COVID-19, Public health < INFECTIOUS DISEASES, PUBLIC HEALTH, Health policy < HEALTH SERVICES ADMINISTRATION & MANAGEMENT                                                                                                                                                                                                                                                                                                                  |
|                                 |                                                                                                                                                                                                                                                                                                                                                                                                                                            |

SCHOLARONE™  
Manuscripts



I, the Submitting Author has the right to grant and does grant on behalf of all authors of the Work (as defined in the below author licence), an exclusive licence and/or a non-exclusive licence for contributions from authors who are: i) UK Crown employees; ii) where BMJ has agreed a CC-BY licence shall apply, and/or iii) in accordance with the terms applicable for US Federal Government officers or employees acting as part of their official duties; on a worldwide, perpetual, irrevocable, royalty-free basis to BMJ Publishing Group Ltd ("BMJ") its licensees and where the relevant Journal is co-owned by BMJ to the co-owners of the Journal, to publish the Work in this journal and any other BMJ products and to exploit all rights, as set out in our [licence](#).

The Submitting Author accepts and understands that any supply made under these terms is made by BMJ to the Submitting Author unless you are acting as an employee on behalf of your employer or a postgraduate student of an affiliated institution which is paying any applicable article publishing charge ("APC") for Open Access articles. Where the Submitting Author wishes to make the Work available on an Open Access basis (and intends to pay the relevant APC), the terms of reuse of such Open Access shall be governed by a Creative Commons licence – details of these licences and which [Creative Commons](#) licence will apply to this Work are set out in our licence referred to above.

Other than as permitted in any relevant BMJ Author's Self Archiving Policies, I confirm this Work has not been accepted for publication elsewhere, is not being considered for publication elsewhere and does not duplicate material already published. I confirm all authors consent to publication of this Work and authorise the granting of this licence.

1  
2  
3  
4 **FACTORS INFLUENCING GLOBAL EQUITABLE ACCESS TO COVID-19**  
5  
6 **VACCINES FOR LOW-AND MIDDLE-INCOME COUNTRIES: A SCOPING**  
7  
8 **REVIEW**  
9

10  
11 **Authors: Elizabeth Peacocke, Lieke Fleur Heupink, Katrine Frønsdal, Elin Hoffmann**  
12 **Dahl, Lumbwe Chola**  
13

14  
15 Corresponding author: Elizabeth Peacocke, DPH, Norwegian Institute of Public Health,  
16 Division for Health Services (a) [Elizabeth.Peacocke@fhi.no](mailto:Elizabeth.Peacocke@fhi.no), t. +47 941 60 559  
17

18  
19 Lieke Fleur Heupink, MSc. [LiekeFleur.Heupink@fhi.no](mailto:LiekeFleur.Heupink@fhi.no), Norwegian Institute of Public  
20 Health (a)  
21

22 Katrine Bjørnebek Frønsdal, PhD. [Katrine.Fronsdal@fhi.no](mailto:Katrine.Fronsdal@fhi.no), Norwegian Institute of Public  
23 Health (a)  
24

25 Elin Hoffmann Dahl, MD. [elin.hoffmann.dahl@helse-bergen.no](mailto:elin.hoffmann.dahl@helse-bergen.no) Haukeland  
26 Universitetssjukehus (b)  
27

28 Lumbwe Chola, PhD. [Lumbwe.Chola@fhi.no](mailto:Lumbwe.Chola@fhi.no), Norwegian Institute of Public Health (a)  
29

30 (a) Norwegian Institute of Public Health

31 Division for Health Services

32 Postbox 222 Skøyen, 0213 Oslo, NORWAY

33 Visiting address: Sandakerveien 24C, Entrance D11, 0473 Oslo, NORWAY  
34

35  
36 (b) Department of Medicine, Haukeland Universitetssjukehus, Bergen, Norway  
37

38  
39 *Key words: COVID-19 vaccine, equitable access, fair allocation, equitable distribution,*  
40 *scoping review*  
41

42 Word Count: (6321 incl. abstract)  
43  
44

45 List of attachments:

- 46 1. Figure 1: Timeline of relevant events and initiatives
- 47 2. Figure 2: PRISMA
- 48 3. Appendix 1: Articles underlying this brief
- 49 4. Appendix 2: Updated protocol
- 50 5. Appendix 3 Updated search strategies
- 51 6. Appendix 4: Data extraction template
- 52 7. Appendix 5: Excluded articles and reason for exclusion
- 53
- 54
- 55
- 56
- 57
- 58
- 59
- 60

## Abstract

Objective: To identify the key factors influencing equitable access to Coronavirus Disease 2019 (COVID-19) vaccines for Low-and middle-income countries (LMIC).

Methods: We searched for published literature (through May 2021) and conducted a Scoping Review following the guidelines for Preferred Reporting Items for Systematic Reviews and Meta-Analyses extension for Scoping Reviews and a five-stage framework for scoping studies.

Results: Systematic searches in five databases (Medline, Embase, Web of Science, Global Index Medicus, and COVID-19 Evidence Epistemonikos) resulted in the selection of 45 peer-reviewed articles that met our predefined inclusion criteria, with no limitations based on study design nor publication type. We derived five key factors that influence equitable access to COVID-19 vaccines in LMICs: (1) collectively agreed global mechanisms or frameworks; (2) bilateral purchasing, contractual arrangements, and price of vaccines; (3) large-scale vaccine manufacturing that is supported by sharing know-how; and (4) countries' strength in implementing vaccination programs.

Conclusions: This scoping review highlights the ongoing challenges for the international community in ensuring equitable access to COVID-19 vaccines for vulnerable countries. Vaccine manufacturing was deemed to be of the high importance in the supply of vaccines, as was the role of patent holders who influence global governance through their role in the distribution of COVID-19 vaccines. Our review shows the importance of including the principles of equitable access throughout vaccine research and development, procurement, scale-up, and distribution processes. Finally, advances made with mRNA vaccines may have additional benefits in relation to expanding the manufacturing of other vaccine. The exploration and scale-up of such capacities of LMICs are likely to prove to be a valuable investment, even after the pandemic.

### Strengths and limitations of this study

- To our knowledge, this is the first systematic scoping review of factors influencing equitable access to COVID-19 vaccines.
- A limitation was that literature, provided that it was published in a peer-reviewed journal, was only chosen based on relevance to the topic of identifying factors related to equitable access, with no further quality assessment (see Appendix 1 describing the 45 articles underlying this review).
- In light of the numerous articles being published on a daily basis related to the COVID-19 pandemics, there might be additional relevant articles that should have been included in this review.
- We used the framework proposed by Liu et al. (2020) as a basis for our analysis. However, the identified factors are based on empirical observations in the reviewed literature.

Funding: This work was partially supported by the Evaluation Department of the Norwegian Agency for Development Cooperation (Norad) in their role as a member of the OECD COVID-19 Global Evaluation Coalition. The funders had no role in the study design, data collection and analysis, decision to publish, or preparation of the manuscript.

## BACKGROUND

The Coronavirus Disease of 2019 (COVID-19) is a global crisis; hence, collective efforts are essential to curb its most devastating effects. The unprecedented demand for a vaccine has mobilized rapid vaccine development and large-scale investment in manufacturing capacity. The outlay of capital from investors for the scale-up and production of early candidate vaccines has contributed to rapid advances in vaccine science<sup>1</sup>. Despite these investments, the demand for safe, affordable, and effective COVID-19 vaccines is expected to outstrip supply for a considerable period of time<sup>2</sup>. To realize the maximum benefit of these vaccines, vaccines should be shared fairly between all nations of the world, otherwise there will continue to be differential morbidity and mortality with increased risk of virus mutations leading to even more death and disease from COVID-19, not to mention the indirect consequences to the global development and economy<sup>3</sup>.

In relation to the management of communicable disease outbreaks, the principle of shared benefits is a long-standing commitment of the World Health Organization (WHO)<sup>4</sup>. The Global Influenza Surveillance and Response System (GISRS) suggests benefit sharing as a potential solution to incentivize global collaborative infectious disease responses and measures, and in return members have real-time access to pandemic response products, like vaccines<sup>5 6</sup>. Low- and middle-income countries (LMIC) face unique challenges in accessing vaccines as they do not have the same resources to purchase vaccines and are less likely to have the know-how and technological capacity to be able to manufacture their own vaccines. They may also face uncertainty in their ability to obtain vaccines due to reduced purchasing power compared to high income countries (HIC) when negotiating with vaccine manufacturers<sup>7</sup>. They are therefore more reliant on multilaterally agreed frameworks or bilateral support to access new technologies<sup>6</sup>. The global community has previously in part

1  
2  
3 managed this with non-binding mechanisms designed to promote equitable access. The 2006  
4 WHO Global pandemic influenza action plan, for instance, was designed to support increased  
5 vaccine supply and global vaccine manufacturing capacity, by promoting technology transfer  
6 to middle income countries (MICs)<sup>8</sup>. As established vaccine manufacturing nations, some  
7 MICs' expertise can support the scale-up of vaccine production.  
8  
9  
10  
11  
12  
13  
14  
15  
16

17 Ineffective institutional mechanisms for pandemic vaccine distribution were exposed during  
18 the influenza A (H1N1) ("Swine flu") pandemic in 2009<sup>6</sup>, despite embedded principles of  
19 reciprocity and equity for the prevention and control of influenza pandemics affirmed by  
20 member states at 2003 World Health Assembly. Swine flu and the COVID-19 pandemic are  
21 reminders that there is no institutional mechanism to effectively distribute global goods such  
22 as COVID-19 vaccines<sup>4</sup>. The Pandemic Influenza Preparedness (PIP) Framework that was  
23 developed following the H5N1 outbreak in Indonesia in 2005, triggering increased interest in  
24 the GISRS, which in turn lead to the WHO intergovernmental process and further scrutiny its  
25 influence on the development of influenza vaccines, and recognition of failures to ensure  
26 fairness, transparency and equity in access to vaccines for LMICs<sup>6 9 10</sup>.  
27  
28  
29  
30  
31  
32  
33  
34  
35  
36  
37  
38  
39  
40  
41

42 Specifically for COVID-19, the WHO led the Access to COVID-19 Tools Accelerator (ACT-  
43 A) global collaboration designed to fast-track development, production, and equitable access  
44 to COVID-19 tests, treatments and vaccines<sup>11</sup>. COVAX, the vaccines pillar of the ACT-A, is  
45 an initiative whose role is proving to be integral in the equitable distribution and access to  
46 COVID-19 vaccines, by providing an alternative for LMICs that have been failed by  
47 historical bilateral vaccine donation systems<sup>1 12</sup>. COVAX is co-led by the Coalition for  
48 Epidemic Preparedness Innovations (CEPI), a vaccine funding initiative, Gavi, the vaccine  
49 alliance, and WHO. Member countries of COVAX include those that have self-financing  
50  
51  
52  
53  
54  
55  
56  
57  
58  
59  
60

1  
2  
3 investments, but also others that are being supported through aid. COVAX aims to coordinate  
4 the vaccination of high risk and vulnerable populations, including frontline healthcare  
5 workers, across the world through distributing by the end of 2021 two billion vaccine doses.  
6  
7 These will be shared between the member countries, of which 78 are HICs, and 92 are  
8 LMICs<sup>13</sup>. Figure 1 lists events and a timeline of introduced initiatives before and following  
9 relevant pandemic events, as identified in our scoping review.  
10  
11  
12  
13  
14  
15  
16  
17  
18

### 19 **Figure 1: Timeline of events and relevant initiatives**

20  
21 *See attached as a .png file*  
22  
23  
24  
25

26 The idea that access and distribution of COVID-19 vaccines should be equitable across  
27 countries is widely supported, but what *equity* means in this context is often not specified.  
28 From the perspective of LMICs, equitable access to a vaccine is fundamentally linked to a fair  
29 and transparent global distribution framework<sup>14</sup>. For the purpose of this review, equitable  
30 access is interpreted as all countries, and their populations, having equal access to COVID-19  
31 vaccines irrespective of the income status of the country. Further, we considered a COVID-19  
32 vaccine as an essential medicine\*. And we have used the WHO definition of health equity<sup>15</sup>  
33  
34  
35  
36  
37  
38  
39  
40  
41  
42  
43  
44  
45  
46  
47  
48  
49  
50  
51  
52  
53  
54  
55  
56  
57  
58  
59  
60

16. In its first phase, COVAX plans to allocate vaccines in proportion to countries' total population so that all countries receive doses to cover 20% of their population<sup>17 18</sup>. Alternative proposals exist, including The Fair Priority Model proposed by a group of ethicists. This model goes beyond proportional allocation by proceeding with allocation of vaccines in three phases, that would in the first instance prioritize the prevention of more urgent harms earlier<sup>19</sup>  
20. The ethical rationale behind this model argues that proportional allocation, as suggested by WHO and COVAX, is not the fairest solution, as it implies that some countries with relatively



1  
2  
3 lower risk of death and disease from COVID-19 would receive access to vaccines at the  
4  
5 expense of other countries that are facing more exposure<sup>20</sup>.  
6  
7  
8  
9

10 The objective of this scoping review is to identify and summarize the factors related to the  
11 equitable access of COVID-19 vaccines for LMICs. To our knowledge, the literature related  
12 to the equitable access of COVID-19 vaccines relevant for LMICs has not been systematically  
13 investigated. The review is considered highly relevant as it can provide lessons from previous  
14 experiences and perspectives on equitable access to pandemic vaccine, and identifying key  
15 factors that could guide implementation of future initiatives to ensure equitable access.  
16  
17  
18  
19  
20  
21  
22  
23  
24

25 *\*Essential medicines are those that satisfy the priority health care needs of the population*  
26 *^Health equity or “equity in health” implies that ideally everyone should have a fair*  
27 *opportunity to attain their full health potential and that no one should be disadvantaged from*  
28 *achieving this potential*  
29

## 30 31 32 **METHODS**

33 We performed systematic scoping searches following the Preferred Reporting Items for  
34 Systematic Reviews and Meta-Analyses extension for Scoping Reviews (PRISMA-ScR) as  
35 indicated in Figure 2 and were guided by Arksey and O'Malley's five-stage framework for  
36 scoping studies through the steps of the review<sup>21 22</sup>. The study protocol was peer reviewed by  
37 methodological and subject experts at the Norwegian Institute of Public Health (NIPH) (see  
38 Appendix 2).  
39  
40  
41  
42  
43  
44  
45  
46  
47  
48

49 Based on predefined inclusion criteria (Table 1), we systematically searched the following  
50 five databases: Medline (PubMed and Ovid), Embase, Web of Science, Global Index Medicus  
51 (WHO), and COVID-19 Evidence Epistemonikos. An information specialist, in collaboration  
52 with co-authors, developed the search strategies for the different databases (see Appendix 3).  
53  
54  
55  
56  
57

58 The search was performed on 28 August 2020 and updated on 12 May 2021. Only published  
59  
60

literature in peer-reviewed journals was eligible for inclusion, with no limitations on study design nor publication type. The articles for extraction were exclusively chosen based on relevance to the topic of identifying, describing factors related to equitable access to pandemic or COVID-19 vaccines, with no further quality assessments.

**Table 1: Inclusion criteria**

| Criterion       | Inclusion                                                                              |
|-----------------|----------------------------------------------------------------------------------------|
| Time            | 01 January 2002 – 12 May 2021                                                          |
| Language        | English                                                                                |
| Type of article | Published in peer reviewed journals                                                    |
| Article focus   | Pandemic vaccines incl. influenza or COVID-19 vaccine                                  |
| Outcomes        | Factors influencing equitable access to a pandemic vaccine including COVID-19 vaccines |

Publications were screened based on title and abstract according to the inclusion criteria (Table 1). Two reviewers independently selected articles to be considered for full text screening. The selected articles were then read in full and considered for inclusion or exclusion by two different reviewers. Final decisions of inclusion of relevant articles were determined through consultation between three of the reviewers. Any disagreements were resolved through discussions to reach consensus. See Appendix 4 for the list of the excluded articles and reason for exclusion.

Data extraction was performed by one reviewer and verified by a second. We used a data extraction form designed specifically for this scoping review. We extracted information on the setting; discussion on equity, access, allocation or prioritization of pandemic vaccines; other equity aspects; challenges in implementing equitable access to vaccination between countries; and recommendations for strengthening equitable access to vaccination (Appendix 5). The analytic process followed the principles of thematic synthesis. Liu et al. was identified as an index paper as it closely reflected the focus of our scoping review<sup>23</sup>. The themes identified in

1  
2  
3 this article were used as the basis for our analysis and further refined through an iterative  
4  
5 process as we identified factors influencing equitable access to COVID-19 vaccines in LMIC.  
6  
7  
8  
9

## 10 **RESULTS**

11 Excluding duplicates, our search identified 3,025 unique citations (Figure 2). Screenings first  
12  
13 based on title and abstract then on full text resulted in the final inclusion of 45 articles. See  
14  
15 Appendix 1 for a description of the articles included in the review.  
16  
17  
18  
19

### 20 **Figure 2: PRISMA flow-chart for selection of articles**

21  
22 *See attached .png file*  
23  
24  
25  
26

27 We categorized the identified themes from the included citations into four factors influencing  
28  
29 access to COVID-19 vaccines in LMICs: (1) collectively agreed global mechanisms or  
30  
31 frameworks can contribute to equitable access to COVID-19 vaccines; (2) bilateral  
32  
33 purchasing, contractual arrangements, and price influence fair allocation of vaccines; (3)  
34  
35 large-scale vaccine manufacturing that is supported by sharing know-how can facilitate  
36  
37 increased supply and allocation of COVID-19 vaccines; and (4) countries' strength in  
38  
39 implementing vaccination programs may influence their populations access to vaccines (Table  
40  
41  
42  
43 2).  
44  
45  
46  
47  
48  
49  
50  
51  
52  
53  
54  
55  
56  
57  
58  
59  
60

**Table 2: Summary of main factors influencing equitable access to COVID-19 vaccines**

| Factors                                                                                                                                     | Scoping review findings                                                                                                                                                         | Articles contributing to the finding       |
|---------------------------------------------------------------------------------------------------------------------------------------------|---------------------------------------------------------------------------------------------------------------------------------------------------------------------------------|--------------------------------------------|
| Collectively agreed global mechanisms or frameworks can contribute to equitable access to COVID-19 vaccines                                 | Establishing a collective and coordinated COVID-19 donation process will facilitate equitable allocation of pandemic vaccines                                                   | 1 5 13 24-41                               |
|                                                                                                                                             | Global solidarity is facilitated by multilateral organizations and agreed frameworks                                                                                            | 1 5 25 28 30 33 34 36 42                   |
|                                                                                                                                             | Previous collective action has been inadequate with examples of deficient vaccine donation and pledging systems related to pandemic vaccines                                    | 1 7 26 30-35 37 42-47                      |
|                                                                                                                                             | Vaccine patent holders play a pivotal role in global the prices and distribution of vaccines                                                                                    | 6 30 46 48-51                              |
| Bilateral purchasing, contractual arrangements, and price influence the fair allocation of vaccines                                         | Financing mechanisms that facilitate collective purchasing or pooled procurement favor fairer allocation                                                                        | 1 5 6 25 28 29 33 34 40 43 47 48 52-54     |
|                                                                                                                                             | Nationalistic approaches, where bilateral rather than collective purchasing is pursued, contribute to hoarding or supply inefficiencies, limiting the global supply of vaccines | 1 7 23-27 29 31-34 36-38 41 42 44 50 54-58 |
|                                                                                                                                             | Pandemic vaccines will largely be purchased by, and for use in, high income countries (HICs)                                                                                    | 25 27-30 32-38 40-42 44-47 54-57 59        |
|                                                                                                                                             | LMICs cannot procure or negotiate the purchase of pandemic vaccines at the same level as HICs, and can therefore be disadvantaged by bilateral deals                            | 1 6 25 29 32 33 37 56 59                   |
|                                                                                                                                             | The price and affordability of vaccines influences equitable access                                                                                                             | 7 27-29 33 47 48 53                        |
| Large-scale vaccine manufacturing that is supported by sharing know-how can facilitate increased supply and allocation of COVID-19 vaccines | Substantial investments are required to finance and support global vaccine manufacturing                                                                                        | 5 7 29 32 33 37-39 41 46 49 53             |
|                                                                                                                                             | There is disparity between countries that have the capacity to produce vaccines and those that use vaccines                                                                     | 5 7 24 42 51 56                            |
|                                                                                                                                             | Technology transfer of vaccine manufacturing (especially to MICs) supports increased supply favoring fairer allocation                                                          | 1 6 27-30 35-37 46 48-50 54 56             |
|                                                                                                                                             | Intellectual property rights influence domestic manufacturing                                                                                                                   | 6 29 33 36 37 46 48 51                     |
|                                                                                                                                             | Capacity building for technology transfer can support vaccine manufacturing and technology transfer in LMIC                                                                     | 1 6 27 29 32 33 48 53 56                   |
|                                                                                                                                             | Place of vaccine manufacturing influences exporting of vaccines, such as through a nation’s sovereignty over national borders                                                   | 1 6 27 29 42 48 51-53 56                   |

| Factors                                                                                                     | Scoping review findings                                                                                                  | Articles contributing to the finding |
|-------------------------------------------------------------------------------------------------------------|--------------------------------------------------------------------------------------------------------------------------|--------------------------------------|
| Countries' strength in implementing vaccination programs may influence their populations access to vaccines | A country's ability to vaccinate should be a consideration in equitable distribution                                     | 1 13 24 27 41 60 61                  |
|                                                                                                             | Management of logistical and administrative components facilitate distribution of vaccines                               | 5 13 27 28 37 47                     |
|                                                                                                             | A countries' regulatory approval and market authorization processes for vaccines influences the distribution of vaccines | 30 33 37 51 58 61                    |

For peer review only

- *Collectively agreed global mechanisms or frameworks can contribute to equitable access to COVID-19 vaccines*

Most articles included in the review indicated that collective action as a key factor that contributes to equitable access<sup>1 5 6 13 24-35 37-40 42-52</sup>. Global collective agreements should be driven by multilateral agencies that have the global mandate to convene interest groups, advocate for collective response measures, as well as the investment, procurement and distribution of pandemic vaccines<sup>58</sup>. These measures may be addressed by prompt agreement on equitable access<sup>5 30 39 41</sup>.

Historic vaccine donation and pandemic influenza pledging systems, have been insufficient, mainly due to the lack of legal obligation to act or the lack of penalty for parties who breach conditions<sup>1 26 27 30-35 37 42-45 47</sup>. It is suggested that collective approaches need to be binding<sup>35</sup>.

Actually, such a legal framework that has been ratified by 171 countries already exists, the International Covenant on Economic, Social, and Cultural Rights (1966), however, it has not achieved its intended purpose for countries to take steps to ensure the right to health and the benefits of scientific research, without discrimination<sup>34 44</sup>. Nevertheless, and in spite of these so-called failures of collective action, there is wide acceptance of the moral argument that HICs should support LMICs in equitable access to pandemic vaccines, recognizing that any collective purchasing will have inherent inequalities related to existing power dynamics between the Global North over the Global South, and this status quo historically favored HICs over LMICs<sup>25 35</sup>. Specifically for vaccine allocation, there are examples of manufacturers historically not reliably committed to reserving production of pandemic vaccines to LMICs<sup>6 26 42</sup>.

1  
2  
3 Bilateral solutions threaten collective action by enabling some countries to queue jump <sup>1 29</sup>.  
4  
5 These approaches will always be pursued during global crises, as has been demonstrated  
6  
7 during COVID-19, and as such cannot be avoided <sup>32</sup>. McAdams et al. therefore suggests that  
8  
9 it comes down to how these bilateral arrangements are structured, using two deals from  
10  
11 different US government agencies the Biomedical Advanced Research and Development  
12  
13 Authority (BARDA), who has a deal with AstraZeneca, and the US Department of Health and  
14  
15 Human Services (HHS), who secured 100 million doses of Pfizer, as examples<sup>32</sup>. The authors  
16  
17 suggest that the deal negotiated by BARDA benefits US, AstraZeneca and the rest of the  
18  
19 world by supporting the gaining, and sharing, of knowledge through its funding of advanced  
20  
21 clinical studies, vaccine manufacturing technology transfer, process development and scaled-  
22  
23 up manufacturing, which in turn supports more vaccines and increased availability. Where the  
24  
25 Pfizer deal only supports US and Pfizer interests. The article concludes that BARDA's deal  
26  
27 will result in more vaccines for LMICs, regardless of whether HICs vaccinate their own  
28  
29 populations first<sup>32</sup>.  
30  
31  
32  
33  
34  
35  
36  
37

38 COVAX is the supported mechanism that has been widely promoted in the literature included  
39  
40 in this review, yet the facility has faced criticisms related to transparency, limited knowledge  
41  
42 sharing, and that it has needed more political and financial commitment <sup>31 55</sup>. It has also faced  
43  
44 challenges related to managing the role of patent holders who have played a determining role  
45  
46 in distribution of their medical countermeasures. This affects global governance, with patent  
47  
48 holders holding influence over the distribution of patented technologies during a pandemic, a  
49  
50 power that rests with few pharmaceutical companies controlling the global supply and  
51  
52 distribution of vaccines<sup>48 50</sup>.  
53  
54  
55  
56  
57  
58  
59  
60

1  
2  
3 The global prices of respective vaccines are not uniform across setting, with the price of a  
4 COVID-19 vaccine influenced by its patent<sup>29 47 50</sup>. To counteract the inequality in global  
5 distribution, in October 2020, a proposal was made by India and South Africa to the World  
6 Trade Organization (WTO) requesting a temporary waiver of certain provisions of the Trade-  
7 Related Aspects of Intellectual Property Rights (TRIPS) Agreement, on the basis of a need to  
8 prevent, contain, and treat COVID-19<sup>46 50</sup>. There is no consensus in the literature included in  
9 this review on the benefits of the waiving of intellectual property rights (IPR), with those  
10 against the waiver, arguing that it is not patent protection that is the barrier to introducing  
11 generic vaccines<sup>44 46 49</sup>, but rather the lack of knowledge in the public domain and shortages of  
12 vaccine supplies<sup>1</sup>. The implications on national manufacturing, including a countries' ability  
13 to enact compulsory licensure under TRIPs is discussed later in this article.

- 30 • *Bilateral purchasing, contractual arrangements, and price influence the fair allocation of*  
31 *vaccines*

32  
33  
34  
35 HICs have a track-record of dominating the global supply of pandemic vaccines, through  
36 greater advanced purchasing power, and their ability (including proximity) to vaccine  
37 manufacturing. In 2021, 51% of the initial supply of COVID-19 vaccines had been purchased  
38 for 13% of the world's population, mostly residing in HICs<sup>28 30 42</sup>, indicating that fair vaccine  
39 allocation is hindered by the inability of LMICs to procure or negotiate access to pandemic  
40 vaccines at the same level as HICs<sup>6 59</sup>.

41  
42  
43  
44  
45  
46  
47  
48  
49  
50  
51 Vaccine development under the COVID-19 pandemic has highlighted the conflicting roles  
52 between the role of private capital and access to essential health care technologies. Final stage  
53 R&D of vaccines (and other medical technologies) are largely led by multi-national  
54 pharmaceutical companies who are incentivized by IPR and return on investment, thus  
55  
56  
57  
58  
59  
60



1  
2  
3 perpetuating structural market-based inequalities of supply and demand. This affects the total  
4 quantity of vaccines produced, which, in the case of influenza vaccines, has affected LMIC as  
5  
6 it has been perceived that there is “lower demand” in these markets<sup>35 52</sup>.  
7  
8  
9

10  
11  
12 Pooled procurement is mentioned in the literature of this review as a means to support equity,  
13  
14 with Advanced Purchase Agreements (APA) and Advanced Market Commitments (AMC),  
15  
16 the most common mechanisms identified in our review to facilitate access in LMIC<sup>5 6 25 28 29 33</sup>  
17  
18 <sup>34 40 47 48 52-54</sup>. APAs being those contracts with a specific product developer, whereas an AMC  
19  
20 is a global market commitment rather than to any particular company or product<sup>40</sup>. The AMC  
21  
22 was first introduced in 1999 for the development of a late-stage pneumococcal vaccine,  
23  
24 identified as shortening the time to introduction of a vaccine to LIMCs.<sup>40</sup> Under COVID-19,  
25  
26 APAs have been widely used to secure priority access to a scarce resource (when one party  
27  
28 has committed to buy a specific number or percentage of doses prior to development), and the  
29  
30 influential factor for equitable access being whether they promote the interests of one country  
31  
32 or several, and if they include LMICs <sup>5 6 30 34 43 52</sup>.  
33  
34  
35  
36  
37  
38  
39

40  
41 Bilateral deals contribute to supply inefficiencies, and threaten collective approaches to the  
42  
43 procurement of vaccines, e.g. National APAs initiated by countries that are also members of  
44  
45 COVAX (not exclusively, but mainly HICs)<sup>32 37 38 54 55</sup>. At the beginning of the COVID-19  
46  
47 pandemic, HICs went ahead purchasing large quantities of COVID vaccines<sup>31</sup>. The necessity  
48  
49 for transparency of contractual clauses, especially relating to pricing, licensing and purchase  
50  
51 commitments, was identified in the review – finding that global coordination efforts will  
52  
53 suffer unless vaccine manufacturers can be trusted to responsibly decide which countries’  
54  
55 vaccine orders should be prioritized<sup>34 37</sup>.  
56  
57  
58  
59  
60

1  
2  
3 Bilateralism is not limited to relationships between countries and vaccine manufacturers.  
4  
5 Through COVID-19 bilateral deals have also been struck between countries, to directly  
6  
7 distribute vaccines. For example, both the Russian and Chinese government owned and  
8  
9 operated vaccine manufacturers have bilateral arrangements with other countries, such as  
10  
11 India, Vietnam, Mexico, Brazil, and Ethiopia to guarantee the supply of vaccines<sup>28 29 54 56</sup>.

- 17 • *Large-scale vaccine manufacturing that is supported by sharing know-how can facilitate*  
18  
19 *increased supply and allocation of COVID-19 vaccines*

21 Several articles included in this review suggest that substantial additional financial and  
22  
23 capacity investment is required to further global vaccine manufacturing<sup>5 7 29 32 33 37 39 41 46 49 53</sup>

26 <sup>62</sup>. Vaccine development is multifaceted, and manufacturing during a pandemic faces  
27  
28 unprecedented challenges in scale and complexity<sup>58</sup>. A limited number of HICs, and some  
29  
30 MICs, have vaccine manufacturing capacity, resulting in a disparity between countries that  
31  
32 have the capacity to produce vaccines and those that need access to those vaccines<sup>5 7 24 42 51 56</sup>.

35 Nhamo et al. reported that development activity for COVID-19 vaccines is almost non-  
36  
37 existent in LMICs<sup>33</sup>. The majority of development activity is in Asia, with 12 (52%) COVID-  
38  
39 19 vaccine development programs, followed by Europe (17%) and North America with four  
40  
41 programs each (17%)<sup>33</sup>. A few MICs (Brazil, India and Peru) have capitalized on their clinical  
42  
43 testing and/or manufacturing capacity efforts by leveraging these for purchase agreements  
44  
45 with vaccine manufacturers<sup>29</sup>. Limited capacity affects the global availability of pandemic  
46  
47 vaccines for two reasons. Firstly, the world is unable to manufacture the quantity of vaccines  
48  
49 demanded, and secondly, a manufacturing country has the sovereign authority over goods  
50  
51 produced within its borders with most countries in the world having legislation in place that  
52  
53 require companies to manufacture and prioritize domestic consumption<sup>33 51 52</sup>. In situations  
54  
55 where it is enforced, government intervention may hinder global distribution.  
56  
57  
58  
59  
60

1  
2  
3  
4  
5 For technology transfer to work there needs to be a patent holder that is willing to share the  
6 intellectual property and a manufacturing facility that is able to receive it. The findings from  
7 this review suggest that MICs with vaccine manufacturing capability can play an important  
8 role to support filling the forecasted gap in international vaccine manufacturing capacity, but  
9 this requires technology transfer and capacity building to manufacture vaccines that meet the  
10 same efficacy and quality standards as the original vaccine<sup>1 6 27-30 35-37 46 48-51 54 56</sup>. Vaccine  
11 manufacturing know-how can include vaccine developers sharing the intellectual property of  
12 vaccine manufacturing processes, or relaxing patent rights<sup>6 29 33 36 37 46 48</sup>. One article included  
13 in the scoping review suggests that for viral vector vaccines (e.g. AstraZeneca and Johnson &  
14 Johnson), MICs with less advanced manufacturing capacity can contribute with the fill-and-  
15 finish stage of the process, rather than producing the active solution of the vaccine<sup>49</sup>.

16  
17  
18  
19  
20  
21  
22  
23  
24  
25  
26  
27  
28  
29  
30  
31  
32  
33 Under the WTO TRIPS Agreement, countries' have a right for the compulsory licensure of  
34 products in certain circumstances. In practice, this means that a country can produce a  
35 patented product or process without the consent of the patent owner, as demonstrated by  
36 Canada, Chile and Ecuador in their pandemic response<sup>29</sup>. The discussion related to the TRIPS  
37 waiver is especially important to LMICs who recall recent historical experiences from South  
38 Africa where patents obstructed access to life-saving medicines for the treatment of  
39 HIV/AIDS<sup>44</sup>. Advocates for the COVID-19 products TRIPS waiver argue that significant  
40 public monies has contributed to the development of these patents, waiving IPR will support  
41 vaccine development and manufacturing, and that some countries are already undermining  
42 existing TRIPS flexibilities through restrictive free trade agreements<sup>36 44 54 55</sup>. Proponents  
43 against governments' enacting patent waivers claim that they contribute to inefficiencies by  
44 diverting raw materials and supplies away from effective manufacturers<sup>49</sup>. Compulsory  
45  
46  
47  
48  
49  
50  
51  
52  
53  
54  
55  
56  
57  
58  
59  
60

1  
2  
3 licenses are not considered by these proponents as being a practical tool to rapidly expand  
4 access to vaccines, instead they support voluntary licensure, e.g. AstraZeneca's arrangements  
5 with Indian and Brazilian manufacturers<sup>1 46 49</sup>. A related issue impacting on manufacturing  
6 capacity is the use of limited manufacturing capacity on all vaccine candidates. So et al.  
7 caution that a weakness of prematurely exhausting capacity for vaccines that show early  
8 safety and efficacy promise is that manufacturing capacity will then be locked into first  
9 generation vaccines, and may be a bottleneck for manufacturing capacity for second  
10 generation, more effective, vaccines<sup>54</sup>.

11  
12  
13  
14  
15  
16  
17  
18  
19  
20  
21  
22  
23  
24 Finally, two noteworthy initiatives are identified in the literature reviewed, the Global  
25 pandemic influenza action plan to increase vaccine supply (GAP) (2006-2016), a strategy to  
26 reduce global shortages of influenza and pandemic vaccines that supports technology  
27 transfer<sup>30 44</sup>. And, secondly, the recent COVID-19 Technology Access Pool (C-TAP) (2020)  
28 proposed by Costa Rica and adopted by WHO (endorsed by 35 mainly MICs and five HICs).  
29 It calls for the voluntary sharing of knowledge, intellectual property, and data as well as a  
30 guarantee of free access and use by WHO member countries for drugs and vaccines that are  
31 developed<sup>29 35 37</sup>. Given the world's limited manufacturing capacity, the use of technology  
32 transfer and pooling of vaccines could help to alleviate a massive shortage of vaccines given  
33 the scale of the need<sup>39</sup>.

- 34  
35  
36  
37  
38  
39  
40  
41  
42  
43  
44  
45  
46  
47  
48  
49 • *Countries' strength in implementing vaccination programs may influence their*  
50  
51 *populations access to vaccines*

52  
53  
54 The findings from this scoping review further suggest that the ability of a country to  
55 implement a mass vaccination program is an important factor to influence equitable access<sup>23</sup>.

56  
57  
58  
59  
60 Vaccination programs are resource intensive; therefore, to maximize the benefit of COVID-19

1  
2  
3 vaccines, and reduce waste due to improper implementation, it has been suggested that  
4 allocation frameworks should consider a country's ability to vaccinate<sup>1 13 23 24 27 41 60 61</sup>. Most  
5 LMICs have well-structured immunization programs e.g. for polio, measles and smallpox etc.,  
6 facilitated by organizations such as UNICEF and Gavi which could support a large-scale  
7 pandemic vaccination program. It has been reported that Gavi, for example, has sought to  
8 expand its Cold Chain Equipment Optimization Program<sup>27</sup>. More than half of the countries in  
9 the world lack robust seasonal influenza programs to tackle influenza, despite most associated  
10 death and severe disease from influenza occurring in countries of the Global South<sup>61</sup>. The  
11 down prioritization of seasonal influenza vaccination for older populations in LMICs,  
12 compared to HICs is a vulnerability for the roll out of COVID-19 vaccines<sup>30 33 60 61</sup>. Ruscio et  
13 al. noted that this gap has been attempted to be filled by the recently published WHO Global  
14 Influenza Strategy 2019–2030<sup>61</sup>.

15  
16  
17  
18  
19  
20  
21  
22  
23  
24  
25  
26  
27  
28  
29  
30  
31  
32  
33 Vaccine roll-out requires stable cold chain and supply processes for the necessary logistical  
34 and administrative components to facilitate distribution of vaccines, including financing the  
35 in-country deliver of vaccines, from cold chain to administration<sup>13 27 28 37 47 62</sup>. Different  
36 vaccines have different temperatures for deployment, which will influence supply of vaccine  
37 to communities<sup>13 27 47 49 62</sup>, this is a particular challenge in Sub-Saharan Africa, where only  
38 28% of health care facilities have a reliable energy supply<sup>13</sup>. In this context, vaccines that  
39 require only one dose, or those that can be stored at room temperature, are more likely to  
40 facilitate equitable access<sup>47</sup>. There is also an opportunity to explore the use of new containers  
41 and packaging, that already support distribution, e.g., pre-formed plastic vials are being  
42 successfully used for oral rotavirus and cholera vaccines<sup>60</sup>. Data solutions should also be  
43 considered, these could support alternative vaccine delivery systems for target groups, as well  
44 as being an important tool to capture the populations vaccination history<sup>28</sup>.

1  
2  
3  
4  
5 Smooth regulatory and market authorization processes for vaccines can facilitate the  
6  
7 distribution of vaccines<sup>30 33 37 51 61</sup>. One article from this scoping review highlighted the  
8  
9 importance clinical vaccine studies in LMIC and HIC alike, to support the fast-tracking of  
10  
11 market authorization as local clinical trial data is a recognized grounds for delay to introduce  
12  
13 some vaccines into countries' immunization programs<sup>33</sup>. Delays for products preventing or  
14  
15 treating infectious diseases are cited at being between 4 to 7 years from first approval in a  
16  
17 high-income country and final approval in a country in Sub-Saharan Africa<sup>37</sup>.  
18  
19  
20  
21  
22

## 23 **DISCUSSION**

24  
25 This study identified four key factors that have the potential to promote fairer global access to  
26  
27 COVID-19 vaccines. Our findings show that an international approach is necessary to  
28  
29 minimize the spread of a pandemic. A priori of this review was that there is broad  
30  
31 international support for the principles of equitable distribution of medical countermeasures,  
32  
33 as demonstrated by universal support for WHO resolutions<sup>4 8 9 14 63-66</sup>. COVID-19 has been no  
34  
35 exception, with relevant commitments passed in months following declaration of the  
36  
37 pandemic<sup>17 67-70</sup>. This, however, has not translated into binding commitments. The  
38  
39 establishment ACT-A and COVAX, was partly a recognition of historic failures, as  
40  
41 highlighted in the findings of this review. Co-lead by CEPI and Gavi (in partnership with  
42  
43 WHO), both organizations were established with a commitment of equitable access to  
44  
45 medicines in their ethos. As multi-country endorsed initiatives, they can be considered good  
46  
47 candidates to lead the process for equitable distribution of COVID-19 vaccines<sup>12 71-73</sup>.  
48  
49  
50  
51  
52  
53  
54  
55

56 The risks that sovereign states pose to equitable access by acting in their national interest,  
57  
58 including bilateral agreements with pharmaceutical companies, buying up vaccine stocks  
59  
60

1  
2  
3 during clinical development phases and vaccine hoarding, were anticipated in our findings,  
4  
5 and have, largely, been realized<sup>31</sup>.  
6  
7  
8  
9

10 COVAX's pooled procurement through APAs have faced challenges, initially in accessing the  
11 necessary financing, which in turn delayed securing supply against other HIC purchasers<sup>14 27</sup>  
12  
13  
14  
15 <sup>29</sup>. In addition, it has also faced critique on how price has been determined and whether any  
16 costs can be recovered if vaccine candidates fail<sup>34 40 74</sup>. While COVAX has attempted to meet  
17 foreseen gaps<sup>14</sup>, it has been challenged by national interests, highlighted recently with  
18 announcements that Australia is purchasing booster shots<sup>75</sup>, and that several HICs plan to  
19 donate parts of their surplus vaccines to LMICs directly<sup>76</sup>, rather than through the COVAX  
20 facility (regardless of membership), making vaccines a tool of geopolitics.  
21  
22  
23  
24  
25  
26  
27  
28  
29

30 The pandemic has shown several examples of countries enacting their sovereign authority  
31 over goods produced within its borders; one example being the USA's invocation of the  
32 Defense Production Act reducing export of Active Pharmaceutical Ingredients<sup>77</sup>, which  
33 slowed the production of the AstraZeneca vaccine by its collaborator Serum Institute in  
34 India<sup>78</sup>. More recently, in response to a devastating second wave of COVID-19 infections, the  
35 Indian government imposed an export ban on vaccines, re-directing these to the domestic  
36 market, leading to a further slowdown in doses available to the COVAX facility<sup>79</sup>.  
37  
38  
39

40 Additionally, the redirection of vaccine manufacturing capacity to scale up production of  
41 COVID-19 vaccines will likely impact on the production of other vaccines such as influenza,  
42 measles, mumps and rubella with a disproportionate impact on the global poor<sup>80</sup>.  
43  
44  
45  
46  
47  
48  
49  
50  
51  
52  
53  
54

55 The rollout of a population wide immunization program has put most governments to the test,  
56 with many being critiqued for botched rollouts. Australia and Japan are two HICs that have  
57  
58  
59  
60

1  
2  
3 faced criticism over the delays related to the logistical issues of setting up such a large  
4  
5 vaccination program<sup>81 82</sup>. In June 2020, it was reported that less than 15% of imported vaccine  
6  
7 doses in Japan had been used so far<sup>82</sup>. In addition, Japan is one example of a country whose  
8  
9 vaccine implementation was interrupted by national regulatory requirements for domestic  
10  
11 clinical trials, that could not be undertaken due to low numbers of COVID-19 cases. This  
12  
13 prevented Japan from registering for international clinical trials to meet national requirements  
14  
15 related to safety and efficacy<sup>82</sup>. LMICs face similar regulatory delays<sup>27 33</sup>, seemingly a  
16  
17 bureaucratic hurdle that could be planned for, especially given the public health emergency of  
18  
19 the situation, and that these vaccines have already met stringent regulatory standards (i.e. the  
20  
21 US Food and Drug Administration or European Medicines Agency).  
22  
23  
24  
25  
26  
27

28 For LMICs the well-established child immunization programs have targeted parts of the  
29  
30 population, however few LMICs have extensive experience with vaccination of the general  
31  
32 adult population. This makes the COVID-19 the “first” adult vaccination program aiming at a  
33  
34 high coverage rate<sup>83 84</sup>. To facilitate implementation, COVAX has integrated a “Country  
35  
36 Readiness and Delivery (CRD) work stream” to support the introduction of COVID-19  
37  
38 vaccines into national vaccination programs<sup>85</sup>. However, lack of infrastructure, short shelf life  
39  
40 and vaccine hesitancy challenge the vaccine uptake and distribution of vaccines, which has  
41  
42 led to vaccine wastage (e.g. South Sudan and Malawi) or re-deployment to avoid this outcome  
43  
44 (e.g. the Democratic Republic of Congo to Ghana and Madagascar)<sup>86</sup>. Other countries, such as  
45  
46 Bhutan, have impressed with their swift implementation strategies vaccinating 90% of their  
47  
48 eligible adult population in two weeks<sup>87</sup>.  
49  
50  
51  
52  
53  
54  
55

56 The key and long-term solution to equitable access highlighted in our scoping review finding  
57  
58 is the need to broaden the basis of manufacturing of vaccines. A success of the COVID-19  
59  
60



1  
2  
3 response has been the high effectiveness of novel mRNA vaccines that (pre-COVID-19) were  
4 yet to enter human clinical trials. However few manufacturers have the necessary know-how  
5 to set up mRNA manufacturing capacity, resulting in the centralized production in a few  
6 locations in the Global North. WHO has relaunched C-TAP to support a “global one-stop  
7 shop for developers” following nothing being shared by any pharmaceutical company within  
8 the first 12 months of the launch of the C-TAP open platform in mid 2020<sup>88 89</sup>. The TRIPS  
9 patent waiver of COVID-19 products received historical support from the incoming US  
10 Government Administration in May 2021, and has since moved into text-based discussions<sup>90</sup>.

11  
12  
13  
14  
15  
16  
17  
18  
19  
20  
21  
22  
23  
24 Our review acknowledged that ramping up production in LMICs while meeting the necessary  
25 quality standards takes time and will require extensive knowledge transfer from  
26 pharmaceutical companies. Globally, fifteen MICs have vaccine production capacity to  
27 support the global supply of vaccines but only 12 have WHO prequalification status, which is  
28 instrumental for quality assured generic vaccine candidates<sup>27</sup>. The pandemic has further  
29 uncovered the need for more vaccine manufacturing capacity across the whole world. The  
30 acknowledgment of the incommensurable role of manufacturing capacity is captured in a  
31 project led by CEPI project to map out manufacturing capacity for use in future pandemics<sup>91</sup>.  
32  
33  
34  
35  
36  
37  
38  
39  
40  
41  
42 Also, to counteract this, the African Union and African CDC launched a partnership to  
43 increase future vaccine production in Africa<sup>92</sup>.

44  
45  
46  
47  
48  
49 A limitation of this Scoping Review is that literature was exclusively chosen based on  
50 relevance to the topic of identifying and describing factors related to equitable access of  
51 COVID-19 vaccines, meaning that we have included commentaries, editorials, essays and  
52 viewpoints. We determined that these perspectives to be of importance to our research aim,  
53  
54  
55  
56  
57  
58  
59  
60 regardless of the type of publication. Many of the authors are established academics or

1  
2  
3 practitioners in their field, and usual original research and journal publication timeframes are  
4  
5 not appropriate. To manage this limitation, articles were only included if they were published  
6  
7 in a peer reviewed journal.  
8  
9

## 10 11 12 **CONCLUSION**

13  
14 According to current available published peer-reviewed literature, equitable access to  
15  
16 vaccines proves to be an ongoing challenge. The uneven global distribution of vaccines is  
17  
18 starkly shown in the current divide of vaccine coverage where the wealthiest nations have  
19  
20 received more than 87% of the vaccines whilst LMICs just 0.2%<sup>93</sup>. Altogether, findings  
21  
22 identified in this scoping review converge towards vaccine manufacturing being of the high  
23  
24 importance in the supply of vaccines. Future attention could explore the contribution of MICs  
25  
26 to facilitate vaccine supply in a pandemic, including some of the challenges of maintaining  
27  
28 these facilities outside of a pandemic. Building on its COVID-19 success, mRNA  
29  
30 technologies will be used for other vaccines in the future, thus the exploration and scale-up of  
31  
32 such capacities on the African continent is likely to prove to be a valuable investment, even  
33  
34 after the pandemic. Moreover, despite the length of time it takes to build and certify vaccine  
35  
36 manufacturing facilities, steps can be taken to share the know-how of the manufacturing of  
37  
38 effective vaccines, although the full possibilities of relaxing of patent and IPR are yet to be  
39  
40 realized and can contribute to equitable access.  
41  
42  
43  
44  
45  
46  
47  
48

49 Another identified issue was the role that patent holders play in global governance through  
50  
51 influencing the distribution of COVID-19 vaccines, this needs more transparency. In the  
52  
53 search of factors influencing equal access, the importance of including equitable access  
54  
55 principles to in all levels of development seemed to be relevant, e.g., throughout vaccine  
56  
57 research and development, procurement, scale-up and distribution.  
58  
59  
60

## **ETHICS STATEMENT**

Ethical clearance was not required as the review used secondary data that is available in the public domain.

## **CONTRIBUTERS**

EP and LC: Developed the concept, drafted the protocol, data extraction, analysis, writing and review. LH: Data extraction, supported with analysis, writing and review. KF: Methodology, review of extraction, writing and review. EHD: Writing and review.

## **ACKNOWLEDGEMENTS**

Thank you to the following people who helped develop or offered their feedback on the original concept of this scoping review: Marit Johansen (Information Specialist), Benedikte Louise Alveberg, Tenu Avafia, Julia Bidonde, Anita Haslie, Unni Gopinathan, Adam Kamradt-Scott, Ida Kristine Lindkvist, Jasper Littman, Trygve Ottersen, Judit Rius Sanjuan, Ingvil Sæterdal, Christine Årdal.

**DATA SHARING:** No additional data available

**COMPETING INTERESTS:** None declared.

**PATIENT INVOLVEMENT:** No patient involved

**FUNDING:** This work was partially supported by the Evaluation Department of the Norwegian Agency for Development Cooperation (Norad) in their role as a member of the OECD COVID-19 Global Evaluation Coalition. The funders had no role in the study design, data collection and analysis, decision to publish, or preparation of the manuscript.

## References

1. Eccleston-Turner M, Upton H. International Collaboration to Ensure Equitable Access to Vaccines for COVID-19: The ACT-Accelerator and the COVAX Facility. *Milbank Quarterly* 2021 doi: 10.1111/1468-0009.12503
2. Gavi the Vaccine Alliance. COVAX, the act-accelerator vaccines pillar- Insuring accelerated vaccine development and manufacture: Gavi; 2020 [cited 2020 August 3]. Available from: <https://www.gavi.org/sites/default/files/covid/COVAX-Pillar-background.pdf> accessed August 3 2020.
3. National Academies of Sciences E, Medicine, Health, et al. Framework for Equitable Allocation of COVID-19 Vaccine. *National Academies Press (US)* 2020;10:02. doi: <https://dx.doi.org/10.17226/25917>
4. WHA56.19 Prevention and control of influenza pandemics and annual epidemics. Resolution of the Fifty-Sixth World Health Assembly Tenth plenary meeting; 2003.
5. Bollyky TJ, Gostin LO, Hamburg MA. The Equitable Distribution of COVID-19 Therapeutics and Vaccines. *Jama* 2020;07:07. doi: <https://dx.doi.org/10.1001/jama.2020.6641>
6. Eccleston-Turner M. The pandemic influenza preparedness framework: A viable procurement option for developing states? *Medical Law International* 2017;17(4):227-48. doi: <http://dx.doi.org/10.1177/0968533217723683>
7. Fedson DS, Dunnill P. Commentary: From scarcity to abundance: pandemic vaccines and other agents for "have not" countries. *J Public Health Policy* 2007;28(3):322-40.
8. World Health Organization. Global pandemic influenza action plan to increase vaccine supply: Geneva: World Health Organization, 2006.
9. World Health Organization. Brief history of the development of the Framework on Sharing influenza viruses and access to vaccines and other benefits 2011 [cited 2020 December 15]. Available from: <https://www.who.int/influenza/pip/history/en/> accessed December 15 2020.
10. World Health Organization. Pandemic influenza preparedness framework for the sharing of influenza viruses and access to vaccines and other benefits. 2011
11. World Health Organization. The Access to COVID-19 Tools (ACT) Accelerator, 2020.
12. Gavi the Vaccine Alliance. About our alliance. Gavi the Vaccine Alliance,: Gavi the Vaccine Alliance,, 2020.
13. Herlitz A, Lederman Z, Miller J, et al. Just allocation of COVID-19 vaccines. *BMJ Global Health* 2021;6(2):02. doi: <https://dx.doi.org/10.1136/bmjgh-2020-004812>
14. Ana Santos R. The COVID-19 Vaccine Race: Intellectual Property, Collaboration(s), Nationalism and Misinformation. *SSRN* 2020 doi: 10.2139/ssrn.3656929
15. World Health Organization. Health Topics: Health Equity 2020 [cited 2020 August 12]. Available from: [https://www.who.int/topics/health\\_equity/en/](https://www.who.int/topics/health_equity/en/) accessed August 12 2020.
16. World Health Organization. Essential medicines and health products. Essential medicines definition 2020 [cited 2020 August 13]. Available from: [https://www.who.int/medicines/services/essmedicines\\_def/en/](https://www.who.int/medicines/services/essmedicines_def/en/) accessed August 13 2020.
17. World Health Organization. More than 150 countries engaged in COVID-19 vaccine global access facility 2020 [updated July 15 2020. Available from: <https://www.who.int/news-room/detail/15-07-2020-more-than-150-countries-engaged-in-covid-19-vaccine-global-access-facility>.
18. World Health Organization. WHO Concept for fair access and equitable allocation of COVID-19 health products: Final working version 9 September 2020. Geneva: World Health Organization, 2020.
19. Emanuel EJ, Persad G, Kern A, et al. An ethical framework for global vaccine allocation. *Science* 2020;369(6509):1309-12.

20. Herzog LM, Norheim OF, Emanuel EJ, et al. Covax must go beyond proportional allocation of covid vaccines to ensure fair and equitable access. *Bmj* 2021;372
21. Tricco AC, Lillie E, Zarin W, et al. PRISMA extension for scoping reviews (PRISMA-ScR): checklist and explanation. *Ann Intern Med* 2018;169(7):467-73.
22. Arksey H, O'Malley L. Scoping studies: towards a methodological framework. *International journal of social research methodology* 2005;8(1):19-32.
23. Liu Y, Salwi S, Drolet BC. Multivalued ethical framework for fair global allocation of a COVID-19 vaccine. *J Med Ethics* 2020;46(8):499-501. doi: 10.1136/medethics-2020-106516
24. DeFrancesco L. Whither COVID-19 vaccines? *Nature Biotechnology* 2020;38(10):1132-45. doi: <https://dx.doi.org/10.1038/s41587-020-0697-7>
25. Felicitas H, Florencia L, Manriquez RT, et al. A matter of priority: equitable access to COVID-19 vaccines. *Swiss medical weekly* 2021;151 doi: 10.4414/smw.2021.20488
26. Fidler DP. Vaccine nationalism's politics. *Science* 2020;369(6505):749. doi: <https://dx.doi.org/10.1126/science.abe2275>
27. Forman R, Shah S, Jeurissen P, et al. COVID-19 vaccine challenges: What have we learned so far and what remains to be done? *Health Policy* 2021;125(5):553-67. doi: <https://dx.doi.org/10.1016/j.healthpol.2021.03.013>
28. Gray G, van der Heever A, Madhi S, et al. The Scientists' Collective 10-point proposal for equitable and timely access to COVID-19 vaccine in South Africa. *Samj South African Medical Journal* 2021;111(2):89-94. doi: 10.7196/SAMJ.2021.v111i2.15498
29. Guzman J, Hafner T, Maiga LA, et al. COVID-19 vaccines pricing policy options for low-income and middle-income countries. *BMJ Global Health* 2021;6(3):03. doi: <https://dx.doi.org/10.1136/bmjgh-2021-005347>
30. Kamradt-Scott A, Lee K. The 2011 Pandemic Influenza Preparedness Framework: Global Health Secured or a Missed Opportunity? *Political Studies* 2011;59(4):831-47. doi: 10.1111/j.1467-9248.2011.00926.x
31. Kupferschmidt K. Despite obstacles, WHO unveils plan to distribute vaccine. *Science* 2020;369(6511):1553. doi: <https://dx.doi.org/10.1126/science.369.6511.1553>
32. McAdams D, McDade KK, Ogbuonji O, et al. Incentivising wealthy nations to participate in the COVID-19 Vaccine Global Access Facility (COVAX): a game theory perspective. *BMJ Global Health* 2020;5(11):11. doi: <https://dx.doi.org/10.1136/bmjgh-2020-003627>
33. Nhamo G, Chikodzi D, Kunene HP, et al. COVID-19 vaccines and treatments nationalism: Challenges for low-income countries and the attainment of the SDGs. *Global Public Health* 2021;16(3):319-39. doi: <https://dx.doi.org/10.1080/17441692.2020.1860249>
34. Phelan AL, Eccleston-Turner M, Rourke M, et al. Legal agreements: barriers and enablers to global equitable COVID-19 vaccine access. *Lancet* 2020;396(10254):800-02. doi: [https://dx.doi.org/10.1016/S0140-6736\(20\)31873-0](https://dx.doi.org/10.1016/S0140-6736(20)31873-0)
35. Saksena N. Global justice and the COVID-19 vaccine: Limitations of the public goods framework. *Glob Public Health* 2021 doi: 10.1080/17441692.2021.1906926
36. Sehovic AB, Govender K. Addressing COVID-19 vulnerabilities: How do we achieve global health security in an inequitable world. *Global Public Health* doi: 10.1080/17441692.2021.1916056
37. So AD, Woo J. Achieving path-dependent equity for global COVID-19 vaccine allocation. *Medicina Intensiva* 2021;2(4):373-77. doi: <https://dx.doi.org/10.1016/j.medj.2021.03.004>
38. Soares AA. Ensuring equitable access to COVID-19 vaccines. *Bull World Health Organ* 2020;98(12):826-27. doi: 10.2471/blt.20.021220
39. The Lancet Editorial. Global governance for COVID-19 vaccines. *Lancet (London, England)* 2020;395(10241):1883. doi: 10.1016/s0140-6736(20)31405-7
40. Towse A, Chalkidou K, Firth I, et al. How Should the World Pay for a Coronavirus Disease (COVID-19) Vaccine? *Value in Health* 2021;24(5):625-31. doi: <https://dx.doi.org/10.1016/j.jval.2020.12.008>
41. Yamey G, Schäferhoff M, Hatchett R, et al. Ensuring global access to COVID-19 vaccines. *Lancet (London, England)* 2020;395(10234):1405-06. doi: 10.1016/s0140-6736(20)30763-7

- 1
- 2
- 3 42. Fidler DP. Negotiating Equitable Access to Influenza Vaccines: Global Health Diplomacy and the
- 4 Controversies Surrounding Avian Influenza H5N1 and Pandemic Influenza H1N1. *Plos*
- 5 *Medicine* 2010;7(5) doi: [10.1371/journal.pmed.1000247](https://doi.org/10.1371/journal.pmed.1000247)
- 6
- 7 43. Rourke MF. Access by Design, Benefits if Convenient: A Closer Look at the Pandemic Influenza
- 8 Preparedness Framework's Standard Material Transfer Agreements. *Milbank Q*
- 9 2019;97(1):91-112. doi: <https://dx.doi.org/10.1111/1468-0009.12364>
- 10
- 11 44. Sawal I, Ahmad S, Tariq W, et al. Unequal distribution of COVID-19 vaccine: A looming crisis.
- 12 *Journal of Medical Virology* 2021;03:03. doi: <https://dx.doi.org/10.1002/jmv.27031>
- 13
- 14 45. Sharma S, Kawa N, Gomber A. WHO's allocation framework for COVAX: is it fair? *Journal of*
- 15 *Medical Ethics* 2021;09:09. doi: <https://dx.doi.org/10.1136/medethics-2020-107152>
- 16
- 17 46. Usher AD. South Africa and India push for COVID-19 patents ban. *Lancet* 2020;396(10265):1790-
- 18 91. doi: [https://dx.doi.org/10.1016/S0140-6736\(20\)32581-2](https://dx.doi.org/10.1016/S0140-6736(20)32581-2)
- 19
- 20 47. Wouters OJ, Shadlen KC, Salcher-Konrad M, et al. Challenges in ensuring global access to COVID-
- 21 19 vaccines: production, affordability, allocation, and deployment. *Lancet*
- 22 2021;397(10278):1023-34. doi: [https://dx.doi.org/10.1016/S0140-6736\(21\)00306-8](https://dx.doi.org/10.1016/S0140-6736(21)00306-8)
- 23
- 24 48. Abbott FM, Reichman JH. Facilitating Access to Cross-Border Supplies of Patented
- 25 Pharmaceuticals: The Case of the COVID-19 Pandemic. *Journal of International Economic Law*
- 26 2020;23(3):535-61. doi: [10.1093/jiel/jgaa022](https://doi.org/10.1093/jiel/jgaa022)
- 27
- 28 49. Iacobucci G. Covid-19: How will a waiver on vaccine patents affect global supply? *BMJ*
- 29 2021;373:n1182. doi: <https://dx.doi.org/10.1136/bmj.n1182>
- 30
- 31 50. McMahon A. Global equitable access to vaccines, medicines and diagnostics for COVID-19: The
- 32 role of patents as private governance. *Journal of Medical Ethics* 2020;30:30. doi:
- 33 <https://dx.doi.org/10.1136/medethics-2020-106795>
- 34
- 35 51. Fedson DS. Preparing for pandemic vaccination: an international policy agenda for vaccine
- 36 development. *J Public Health Policy* 2005;26(1):4-29.
- 37
- 38 52. Fedson DS. Pandemic influenza and the global vaccine supply. *Clin Infect Dis* 2003;36(12):1552-
- 39 61.
- 40
- 41 53. Forman R, Anderson M, Jit M, et al. Ensuring access and affordability through COVID-19 vaccine
- 42 research and development investments: A proposal for the options market for vaccines.
- 43 *Vaccine* 2020;38(39):6075-77. doi: <https://dx.doi.org/10.1016/j.vaccine.2020.07.068>
- 44
- 45 54. So AD, Woo J. Reserving coronavirus disease 2019 vaccines for global access: cross sectional
- 46 analysis. *Bmj-British Medical Journal* 2020;371 doi: [10.1136/bmj.m4750](https://doi.org/10.1136/bmj.m4750)
- 47
- 48 55. Usher AD. CEPI criticised for lack of transparency. *Lancet* 2021;397(10271):265-66. doi:
- 49 [https://dx.doi.org/10.1016/S0140-6736\(21\)00143-4](https://dx.doi.org/10.1016/S0140-6736(21)00143-4)
- 50
- 51 56. Choi EM. COVID-19 vaccines for low- and middle-income countries. *Transactions of the Royal*
- 52 *Society of Tropical Medicine & Hygiene* 2021;115(5):447-56. doi:
- 53 <https://dx.doi.org/10.1093/trstmh/trab045>
- 54
- 55 57. The Lancet. Access to COVID-19 vaccines: looking beyond COVAX. *Lancet* 2021;397(10278):941.
- 56 doi: [https://dx.doi.org/10.1016/S0140-6736\(21\)00617-6](https://dx.doi.org/10.1016/S0140-6736(21)00617-6)
- 57
- 58 58. Torres I, Artaza O, Profeta B, et al. COVID-19 vaccination: returning to WHO's Health For All. *The*
- 59 *Lancet Global Health* 2020;8(11):e1355-e56. doi: [https://dx.doi.org/10.1016/S2214-](https://dx.doi.org/10.1016/S2214-109X(20)30415-0)
- 60 [109X\(20\)30415-0](https://dx.doi.org/10.1016/S2214-109X(20)30415-0)
- 61
- 62 59. Turner M. Vaccine procurement during an influenza pandemic and the role of Advance Purchase
- 63 Agreements: Lessons from 2009-H1N1. *Glob Public Health* 2016;11(3):322-35. doi:
- 64 <https://dx.doi.org/10.1080/17441692.2015.1043743>
- 65
- 66 60. Pagliusi S, Dennehy M, Kim H, et al. Vaccines, inspiring innovation in health. *Vaccine*
- 67 2018;36(48):7430-37. doi: <https://dx.doi.org/10.1016/j.vaccine.2018.05.035>
- 68
- 69 61. Ruscio BA, Hotez P. Expanding global and national influenza vaccine systems to match the COVID-
- 70 19 pandemic response. *Vaccine* 2020;38(50):7880-82. doi:
- 71 <https://dx.doi.org/10.1016/j.vaccine.2020.10.055>

- 1
  - 2
  - 3
  - 4
  - 5
  - 6
  - 7
  - 8
  - 9
  - 10
  - 11
  - 12
  - 13
  - 14
  - 15
  - 16
  - 17
  - 18
  - 19
  - 20
  - 21
  - 22
  - 23
  - 24
  - 25
  - 26
  - 27
  - 28
  - 29
  - 30
  - 31
  - 32
  - 33
  - 34
  - 35
  - 36
  - 37
  - 38
  - 39
  - 40
  - 41
  - 42
  - 43
  - 44
  - 45
  - 46
  - 47
  - 48
  - 49
  - 50
  - 51
  - 52
  - 53
  - 54
  - 55
  - 56
  - 57
  - 58
  - 59
  - 60
62. Sadeghi R, Masoudi MR, Khanjani N. The commitment for fair distribution of COVID-19 vaccine among all countries of the world. *Research in Nursing & Health* 2021;44(2):266-67. doi: <https://dx.doi.org/10.1002/nur.22112>
63. World Health Assembly Resolution. WHA 61.21. Global strategy and plan of action on public health, innovation and intellectual property. *61st World Health Assembly, Geneva, 19-24 May 2008* 2008
64. World Health Assembly Resolution. WHA65.17 Global vaccine action plan. *65th World Health Assembly, Geneva, 26 May 2012* 2012
65. World Health Assembly Resolution. WHA67. 21. Access to biotherapeutic products including similar biotherapeutics products and ensuring their quality, safety and efficacy. *Sixty-Seventh World Health Assembly* 2014
66. World Health Assembly Resolution. WHA67.22 Access to essential medicines. *Sixty-seventh World Health Assembly* 2014
67. World Health Assembly Resolution. WHA70.3 COVID-19 response. *Seventy-Third World Health Assembly 18 May 2020* 2020
68. World Health Organization. Endorsements of the Solidarity Call to Action 2020 [cited 2020 September 23]. Available from: <https://www.who.int/emergencies/diseases/novel-coronavirus-2019/global-research-on-novel-coronavirus-2019-ncov/covid-19-technology-access-pool/endorsements-of-the-solidarity-call-to-action> accessed September 24 2020.
69. World Health Organization. COVID-19 Technology Access Pool launch. In: World Health Organization, ed. Geneva, 2020.
70. World Health Organization. A global framework to ensure equitable and fair allocation of Covid-19 products. In: WHO, ed. Geneva: WHO, 2020.
71. Huneycutt B, Lurie N, Rotenberg S, et al. Finding equipoise: CEPI revises its equitable access policy. *Vaccine* 2020;38(9):2144-48.
72. Coalition for Epidemic Preparedness Innovations. CEPI Policy Documentation: Equitable access policy 2017 [updated 2017. Available from: [https://msfaccess.org/sites/default/files/2018-09/CEPIoriginalPolicy\\_2017.pdf](https://msfaccess.org/sites/default/files/2018-09/CEPIoriginalPolicy_2017.pdf) accessed December 17 2020.
73. Coalition for Epidemic Preparedness Innovations. Equitable Access Policy - 2019 Oslo Coalition for Epidemic Preparedness Innovations,; 2019 [cited 2020 23 July]. Available from: <https://cepi.net/wp-content/uploads/2019/01/Equitable-Access-Policy.pdf> accessed 23 July 2020.
74. Rizvi Z. COVAX's choices. Washington D.C.: Public Citizen,, 2020.
75. Australian Broadcasting Corporation. Millions of Pfizer booster shots locked in as government plans to continue vaccinations into 2023 2021 [cited 2021 26 July]. Available from: <https://www.abc.net.au/news/2021-07-25/australia-secures-millions-of-pfizer-covid19-booster-shots/100321632>.
76. New York Times. First U.S. Vaccines Will Go to 'Wide Range' of Nations In Need: New York Times; 2021 [cited 2021 20 June]. Available from: <https://www.nytimes.com/2021/06/03/us/politics/vaccine-donations-coronavirus-biden.html>.
77. US Government International Development Finance Corporation. Defense Production Act (DPA) 2021 [cited 2021 15 June]. Available from: <https://www.dfc.gov/dpa> accessed 15 June 2021.
78. Mascarenhas A, Raghavan P. Shortage of vaccine raw materials, SII CEO to Biden: End export embargo: The Indian Express; 2021 [cited 2021 15 June]. Available from: <https://indianexpress.com/article/india/covid-vaccine-export-raw-material-sii-adar-poonawalla-serum-institute-7277089> accessed 15 June 2021.
79. Arora N, Das K, Jain R. EXCLUSIVE: India unlikely to resume sizable COVID-19 vaccine exports until October: Reuters; 2021 [cited 2021 15 June]. Available from: <https://www.reuters.com/world/india/exclusive-india-unlikely-resume-sizable-covid-19-vaccine-exports-until-october-2021-05-18/> accessed 15 June 2021.

- 1  
2  
3 80. Khamsi R. If a coronavirus vaccine arrives, can the world make enough. *Nature* 2020 April 9  
4 2020;578.
- 5 81. Smyth J. Australian PM apologises for slow Covid vaccine rollout as cases rise: Financial Times;  
6 2021 [Available from: <https://www.ft.com/content/0d5be58c-ff44-4186-91e7-000658cc4e67>  
7 accessed 22 July 2021].
- 8 82. Kosaka M, Hashimoto T, Ozaki A, et al. Delayed COVID-19 vaccine roll-out in Japan. *The Lancet*  
9 2021
- 10 83. Mihigo R, Torrealba CV, Coninx K, et al. 2009 Pandemic Influenza A Virus Subtype H1N1  
11 Vaccination in Africa—Successes and Challenges. *The Journal of Infectious Diseases*  
12 2012;206(suppl\_1):S22-S28. doi: 10.1093/infdis/jis535
- 13 84. World Health Organization Regional Office for Africa. H1N1 Pandemic Influenza Vaccine  
14 Deployment in the African Region: Debriefing Meeting: World Health Organization Regional  
15 Office for Africa, 2010.
- 16 85. World Health Organization. COVID-19 vaccine country readiness and delivery: World Health  
17 Organization; 2021 [cited 2021 20 June]. Available from: [https://www.who.int/initiatives/act-  
18 accelerator/covax/covid-19-vaccine-country-readiness-and-delivery](https://www.who.int/initiatives/act-accelerator/covax/covid-19-vaccine-country-readiness-and-delivery) accessed 20 June 2021.
- 19 86. Mwai P. Covid-19 vaccines: Why some African states can't use their vaccines British Broadcastsing  
20 Corporation, : British Broadcastsing Corporation, ; 2021 [cited 2021 21 Junw]. Available from:  
21 <https://www.bbc.com/news/56940657> accessed 21 June 2021.
- 22 87. Samarasekera U. Bhutan: small nation, big ideas affecting respiratory health. *Lancet Respir Med*  
23 2021
- 24 88. Deutsche Welle.com. The COVID-19 vaccines: Where do they come from? Where will they go? :  
25 Deutsche Welle; 2021 [cited 2021 27 July]. Available from: [https://www.dw.com/en/the-  
26 covid-19-vaccines-where-do-they-come-from-where-will-they-go/a-56134178](https://www.dw.com/en/the-covid-19-vaccines-where-do-they-come-from-where-will-they-go/a-56134178) accessed 27  
27 July 2021.
- 28 89. World Health Organization. Establishment of a COVID-19 mRNA vaccine technology transfer hub  
29 to scale up global manufacturing: World Health Organization; 2021 [updated 16 April 2021;  
30 cited 2021 27 July]. Available from: [https://www.who.int/news-room/articles-  
31 detail/establishment-of-a-covid-19-mrna-vaccine-technology-transfer-hub-to-scale-up-  
32 global-manufacturing](https://www.who.int/news-room/articles-detail/establishment-of-a-covid-19-mrna-vaccine-technology-transfer-hub-to-scale-up-global-manufacturing) accessed 27 July 2021.
- 33 90. World Health Organization. WHO Director-General commends United States decision to support  
34 temporary waiver on intellectual property rights for COVID-19 vaccines: World Health  
35 Organization; 2021 [updated 5 May 2021; cited 2021 15 June]. Available from:  
36 [https://www.who.int/news/item/05-05-2021-who-director-general-commends-united-  
37 states-decision-to-support-temporary-waiver-on-intellectual-property-rights-for-covid-19-  
38 vaccines](https://www.who.int/news/item/05-05-2021-who-director-general-commends-united-states-decision-to-support-temporary-waiver-on-intellectual-property-rights-for-covid-19-vaccines) accessed 15 June 2021.
- 39 91. Coation for Epidemic Preparedness Innovations. Survey launched by CEPI to track multinational  
40 vaccine manufacturing capacity for use in future epidemics and pandemics: Coation for  
41 Epidemic Preparedness Innovations,; 2021 [updated 19 May 2021; cited 2021 15 June].  
42 Available from: [https://cepi.net/news\\_cepi/survey-launched-by-cepi-to-track-multinational-  
43 vaccine-manufacturing-capacity-for-use-in-future-epidemics-and-pandemics/](https://cepi.net/news_cepi/survey-launched-by-cepi-to-track-multinational-vaccine-manufacturing-capacity-for-use-in-future-epidemics-and-pandemics/) accessed 15  
44 June 2021.
- 45 92. Africa Union and Africa Centers for Disease and Prevention. African Union and Africa CDC  
46 launches Partnerships for African Vaccine Manufacturing (PAVM), framework to achieve it  
47 and signs 2 MoUs: Africa Union and Africa Centers for Disease and Prevention; 2021  
48 [updated 16 April 2021; cited 2021 15 June]. Available from: [https://africacdc.org/news-  
49 item/african-union-and-africa-cdc-launches-partnerships-for-african-vaccine-manufacturing-  
50 pavm-framework-to-achieve-it-and-signs-2-mous/](https://africacdc.org/news-item/african-union-and-africa-cdc-launches-partnerships-for-african-vaccine-manufacturing-pavm-framework-to-achieve-it-and-signs-2-mous/)
- 51 93. United Nations. Low-income countries have received just 0.2 per cent of all COVID-19 shots given:  
52 United Nations; 2021 [updated 9 April 2021; cited 2021 21 June]. Available from:  
53 <https://news.un.org/en/story/2021/04/1089392> accessed 21 June 2021
- 54  
55  
56  
57  
58  
59  
60



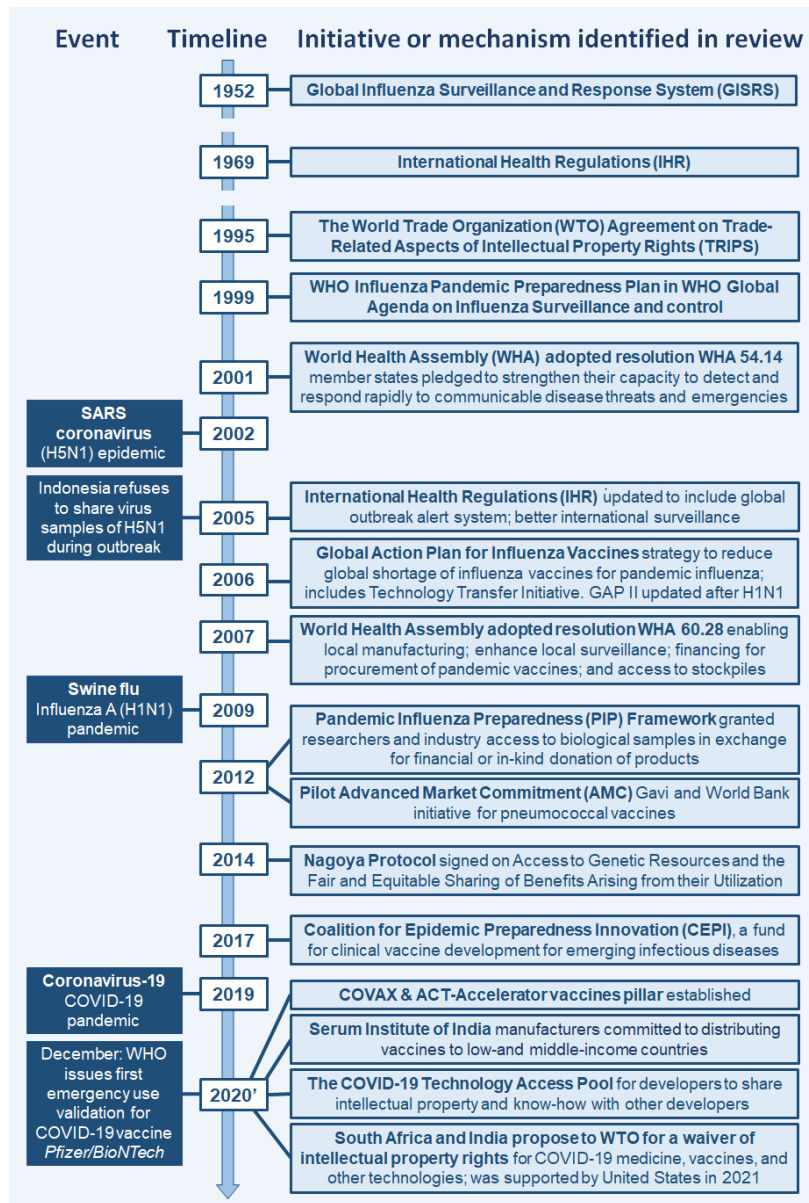

Figure 1: Timeline of events and relevant initiatives

462x680mm (51 x 51 DPI)

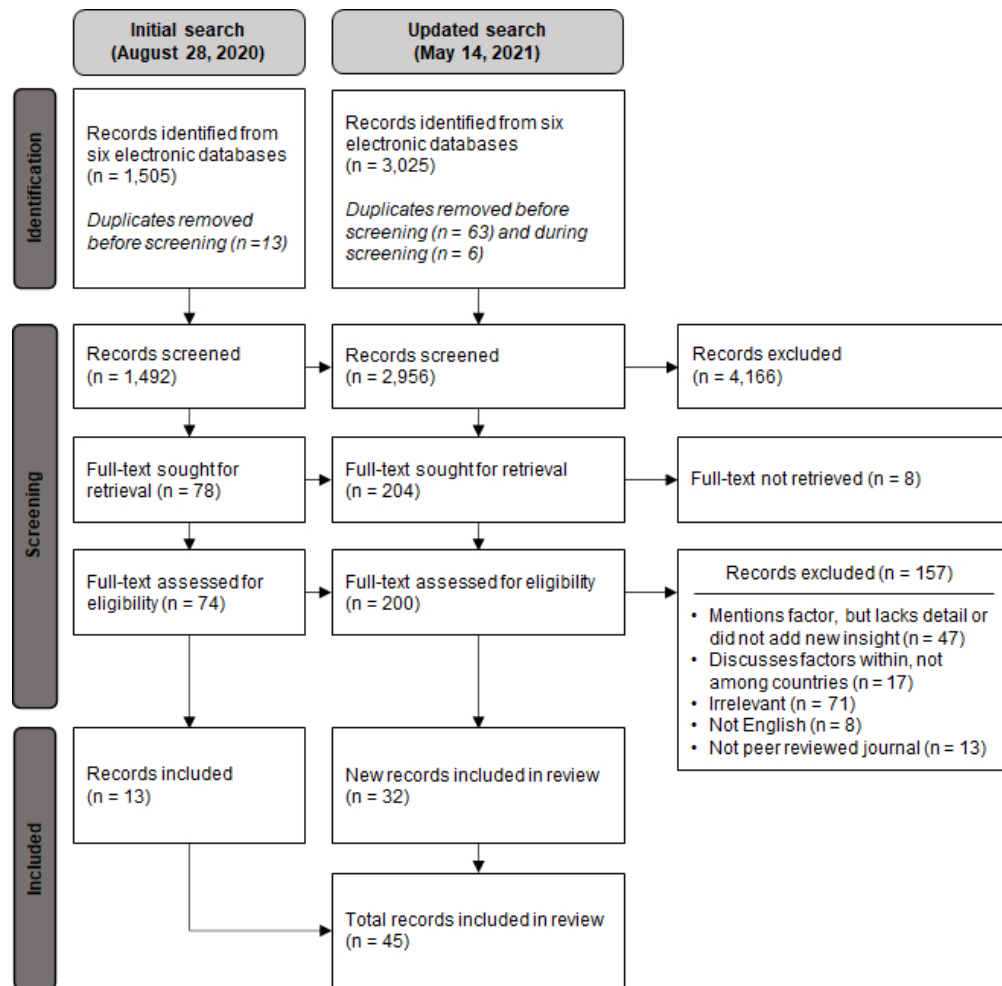

Figure 2: PRISMA flow-chart of articles included and excluded

327x321mm (51 x 51 DPI)

### Appendix 1: Papers underlying this Scoping Review

List of the 44 papers included in the review, including the reference, type of publication and a short summary of the focus of the paper is shown in the table below.

| No | Reference (BMJ style)                                                                                                                                                                                                    | Study design         | Focus of paper                                                                                                                                                                                  |
|----|--------------------------------------------------------------------------------------------------------------------------------------------------------------------------------------------------------------------------|----------------------|-------------------------------------------------------------------------------------------------------------------------------------------------------------------------------------------------|
| 1  | Abbott FM, Reichman JH. Facilitating Access to Cross-Border Supplies of Patented Pharmaceuticals: The Case of the COVID-19 Pandemic. <i>Journal of International Economic Law</i> 2020;23(3):535-61.                     | Article              | Proposes legal mechanisms for addressing critical issues facing the international community in terms of providing equitable access to vaccines, treatments, diagnostics, and medical equipment. |
| 2  | Bollyky TJ, Gostin LO, Hamburg MA. The Equitable Distribution of COVID-19 Therapeutics and Vaccines. <i>Jama-Journal of the American Medical Association</i> 2020;323(24):2462-63. doi: 10.1001/jama.2020.6641           | Viewpoint            | Discusses experiences and suggestions for a future framework to the distribution of COVID-19 vaccines.                                                                                          |
| 3  | Choi EM. COVID-19 vaccines for low- and middle-income countries. <i>Transactions of the Royal Society of Tropical Medicine &amp; Hygiene</i> 2021;115(5):447-56.                                                         | Review               | Discusses low- and middle-income countries access COVID-19 vaccines, what is being done to distribute vaccines fairly, as well as the challenges ahead                                          |
| 4  | DeFrancesco L. Whither COVID-19 vaccines? <i>Nature Biotechnology</i> 2020;38(10):1132-45.                                                                                                                               | Article              | Insights from seven experts on the development of the COVID-19 vaccines.                                                                                                                        |
| 5  | Eccleston-Turner M. The pandemic influenza preparedness framework: A viable procurement option for developing states? <i>Medical Law International</i> 2017;17(4):227-48.                                                | Article              | Examines the Pandemic Influenza Framework and the content of the Obligations of the Company which have been secured by the World Health Organization.                                           |
| 6  | Eccleston-Turner M, Upton H. International Collaboration to Ensure Equitable Access to Vaccines for COVID-19: The ACT-Accelerator and the COVAX Facility. <i>Milbank Quarterly</i>                                       | Original Scholarship | Analysis of the COVAX Facility and its aim and ensure equitable availability of the vaccine in low and middle-income countries.                                                                 |
| 7  | Fedson DS. Pandemic influenza and the global vaccine supply. <i>Clin Infect Dis</i> 2003;36(12):1552-61.                                                                                                                 | Article              | The article explores several issues related to the global supply of vaccine during influenza pandemics                                                                                          |
| 8  | Fedson DS. Preparing for pandemic vaccination: an international policy agenda for vaccine development. <i>J Public Health Policy</i> 2005;26(1):4-29.                                                                    | Commentary           | Focuses on the trivalent vaccines currently available that contain inactivated viruses.                                                                                                         |
| 9  | Fedson DS, Dunnill P. Commentary: From scarcity to abundance: pandemic vaccines and other agents for "have not" countries. <i>J Public Health Policy</i> 2007;28(3):322-40.                                              | Commentary           | Discusses that access to supplies of pandemic vaccine for most countries is a problem of scarcity and how to ensure the "have not" countries will get access to pandemic vaccines.              |
| 10 | Felicitas H, Florencia L, Manriquez RT, et al. A matter of priority: equitable access to COVID-19 vaccines. <i>Swiss Med Wkly</i> 2021;151                                                                               | Viewpoint            | Highlights inequality in current vaccination rates between some high income countries (HIC) and low income countries (LIC) provides arguments for HIC to support distribution to LIC            |
| 11 | Fidler DP. Negotiating Equitable Access to Influenza Vaccines: Global Health Diplomacy and the Controversies Surrounding Avian Influenza H5N1 and Pandemic Influenza H1N1. <i>Plos Medicine</i> 2010;7(5)                | Article              | Examines the diplomatic negotiations surrounding influenza virus sharing as an example of the core tensions characterizing multilateralism and emerging forms of global health governance.      |
| 12 | Fidler DP. Vaccine nationalism's politics. <i>Science</i> 2020;369(6505):749.                                                                                                                                            | Editorial            | Discusses global politics and the burden of global equitable COVID-19 vaccine access issues, historically and now.                                                                              |
| 13 | Forman R, Anderson M, Jit M, et al. Ensuring access and affordability through COVID-19 vaccine research and development investments: A proposal for the options market for vaccines. <i>Vaccine</i> 2020;38(39):6075-77. | Commentary           | Discusses existing financing mechanisms and a proposal for vaccine development, referred to as Options Market for Vaccines (OMV).                                                               |
| 14 | Forman R, Shah S, Jeurissen P, et al. COVID-19 vaccine challenges: What have we learned so far and what remains to be done? <i>Health Policy</i> 2021;125(5):553-67.                                                     | Review               | Offers a framework for understanding remaining and new policy challenges for global vaccine campaigns against COVID-19 and potential solutions.                                                 |

| No | Reference (BMJ style)                                                                                                                                                                                                    | Study design        | Focus of paper                                                                                                                                                                                                                                        |
|----|--------------------------------------------------------------------------------------------------------------------------------------------------------------------------------------------------------------------------|---------------------|-------------------------------------------------------------------------------------------------------------------------------------------------------------------------------------------------------------------------------------------------------|
| 15 | Gray G, van der Heever A, Madhi S, et al. The Scientists' Collective 10-point proposal for equitable and timely access to COVID-19 vaccine in South Africa. <i>Samj South African Medical Journal</i> 2021;111(2):89-94. | (Guest) Editorial   | Proposes a ten-point plan for equitable and timely access to COVID-19 vaccine in South Africa.                                                                                                                                                        |
| 16 | Guzman J, Hafner T, Maiga LA, et al. COVID-19 vaccines pricing policy options for low-income and middle-income countries. <i>BMJ Global Health</i> 2021;6(3):03.                                                         | Commentary          | Discusses four pricing strategies to address high prices and obtain COVID-19 vaccines (and other medical products) at affordable rate.                                                                                                                |
| 17 | Herlitz A, Lederman Z, Miller J, et al. Just allocation of COVID-19 vaccines. <i>BMJ Global Health</i> 2021;6(2):02.                                                                                                     | Editorial           | Offers three suggestions to strengthen how to achieve the greatest health impact with authorized COVID-19 vaccines.                                                                                                                                   |
| 18 | Iacobucci G. Covid-19: How will a waiver on vaccine patents affect global supply? <i>BMJ</i> 2021;373:n1182.                                                                                                             | News analysis       | Presents responses from experts and organizations after Biden administration (US) announced to support a proposal to waive patents on covid-19 vaccines.                                                                                              |
| 19 | Kamradt-Scott A, Lee K. The 2011 Pandemic Influenza Preparedness Framework: Global Health Secured or a Missed Opportunity? <i>Political Studies</i> 2011;59(4):831-47.                                                   | Article             | Investigates the diplomatic negotiations surrounding influenza virus sharing, and evaluates the Pandemic Influenza Preparedness (PIP) framework.                                                                                                      |
| 20 | Kupferschmidt K. Global plan seeks to promote vaccine equity, spread risks. <i>Science</i> 2020;369(6503):489-90.                                                                                                        | News                | Discusses the COVAX facility and its challenges.                                                                                                                                                                                                      |
| 21 | Liu Y, Salwi S, Drolet BC. Multivalued ethical framework for fair global allocation of a COVID-19 vaccine. <i>Journal of medical ethics</i> 2020;46(8):499-501.                                                          | Article             | Analyses and synthesizes the ethical considerations of four allocation paradigms: ability to develop or purchase; reciprocity; ability to implement; and distributive justice.                                                                        |
| 22 | The Lancet. Global governance for COVID-19 vaccines. <i>Lancet (London, England)</i> 2020;395(10241):1883.                                                                                                               | Editorial           | Discusses the COVID-19 vaccine bidding war and the necessary global level arrangements to for development, finance, production, and distribution.                                                                                                     |
| 23 | The Lancet. Access to COVID-19 vaccines: looking beyond COVAX. <i>Lancet</i> 2021;397(10278):941.                                                                                                                        | Editorial           | Calls for a strong political leadership to support equitable access to vaccines                                                                                                                                                                       |
| 24 | McAdams D, McDade KK, Ogbuonji O, et al. Incentivising wealthy nations to participate in the COVID-19 Vaccine Global Access Facility (COVAX): a game theory perspective. <i>BMJ Global Health</i> 2020;5(11):11.         | Commentary          | Discusses how maximizing the benefit of bilateral deals to support COVAX, and explores how such deals can improve the global supply of vaccines.                                                                                                      |
| 25 | McMahon A. Global equitable access to vaccines, medicines and diagnostics for COVID-19: The role of patents as private governance. <i>Journal of Medical Ethics</i> 2020;30:30.                                          | Current controversy | Discusses the role of patents and highlights that during the COVID-19 pandemic the power of patent holders should be questioned.                                                                                                                      |
| 26 | Nhamo G, Chikodzi D, Kunene HP, et al. COVID-19 vaccines and treatments nationalism: Challenges for low-income countries and the attainment of the SDGs. <i>Global Public Health</i> 2021;16(3):319-39.                  | Article             | Discusses the 2030 Agenda for Sustainable Development and calls stakeholders for their continued support to Gavi and COVAX 'to leave no one behind' and eliminate inequalities.                                                                       |
| 27 | Pagliusi S, Hayman B, Jarrett S. Vaccines for a healthy future: 21st DCVMN Annual General Meeting 2020 report. <i>Vaccine</i> 2021;39(18):2479-88.                                                                       | Meeting Report      | Summary of a meeting where public and private sector participants presented challenges and opportunities related to vaccine R&D, supply chain, global policies, financing, health objectives, and supporting access for LMIC.                         |
| 28 | Phelan AL, Eccleston-Turner M, Rourke M, et al. Legal agreements: barriers and enablers to global equitable COVID-19 vaccine access. <i>Lancet</i> 2020;396(10254):800-02.                                               | Commentary          | Discusses role of law on equitable access to COVID-19 vaccines, highlighting challenges of bilateral agreements, advanced purchasing, and COVAX.                                                                                                      |
| 29 | Rourke MF. Access by Design, Benefits if Convenient: A Closer Look at the Pandemic Influenza Preparedness Framework's Standard Material Transfer Agreements. <i>Milbank Q</i> 2019;97(1):91-112.                         | Article             | Analyses the PIP Framework, its Standard Material Transfer Agreements (SMTAs), and secondary sources to determine whether the PIP Framework will effectively function as an access and benefit-sharing (ABS) instrument during an influenza pandemic. |

| No | Reference (BMJ style)                                                                                                                                                                                     | Study design     | Focus of paper                                                                                                                                                                                                                                    |
|----|-----------------------------------------------------------------------------------------------------------------------------------------------------------------------------------------------------------|------------------|---------------------------------------------------------------------------------------------------------------------------------------------------------------------------------------------------------------------------------------------------|
| 30 | Ruscio BA, Hotez P. Expanding global and national influenza vaccine systems to match the COVID-19 pandemic response. <i>Vaccine</i> 2020;38(50):7880-82.                                                  | Commentary       | Discusses the double burden synergies of Influenza and COVID 19 in the Global South, and proposes how a way to address both issues.                                                                                                               |
| 31 | Saksena N. Global justice and the COVID-19 vaccine: Limitations of the public goods framework. <i>Global Public Health</i> 2021                                                                           | Article          | Focuses on global access, discussing the limitations of the global public good framework in addressing the problem of distribution COVID-19 vaccines.                                                                                             |
| 32 | Sawal I, Ahmad S, Tariq W, et al. Unequal distribution of COVID-19 vaccine: A looming crisis. <i>Journal of Medical Virology</i> 2021;03:03.                                                              | Letter to Editor | Argues for the promotion of equitable access to COVID-19 vaccines to benefit the whole world.                                                                                                                                                     |
| 33 | Sharma S, Kawa N, Gomber A. WHO's allocation framework for COVAX: is it fair? <i>Journal of Medical Ethics</i> 2021;09:09.                                                                                | Article          | Explores comparing COVAX allocation mechanisms to a targeted allocation system, based on need. Arguing that this could maximize well-being and align with principles of equity.                                                                   |
| 34 | Sehovic AB, Govender K. Addressing COVID-19 vulnerabilities: How do we achieve global health security in an inequitable world. <i>Global Public Health</i> 2021                                           | Commentary       | Discusses the particular challenges of COVID-19 for LMICs, and the inequities being perpetuated in the COVID-19 Pandemic and the suggestions in how to address these challenges.                                                                  |
| 35 | So AD, Woo J. Reserving coronavirus disease 2019 vaccines for global access: cross sectional analysis. <i>Bmj-British Medical Journal</i> 2020;371                                                        | Special paper    | Analyzes premarket purchase commitments for COVID-19 vaccines from leading manufacturers to recipient countries.                                                                                                                                  |
| 36 | So AD, Woo J. Achieving path-dependent equity for global COVID-19 vaccine allocation. <i>Medicina Intensiva</i> 2021;2(4):373-77.                                                                         | Commentary       | Discusses the interdependence of equitable allocation based on three policy levers: Development and Production, Procurement, and Healthcare Delivery.                                                                                             |
| 37 | Torres I, Artaza O, Profeta B, et al. COVID-19 vaccination: returning to WHO's Health For All. <i>The Lancet Global Health</i> 2020;8(11):e1355-e56.                                                      | Commentary       | Promotes the perspective of World Health Organization, calling for inclusion of all member states, and transparency.                                                                                                                              |
| 38 | Towse A, Chalkidou K, Firth I, et al. How Should the World Pay for a Coronavirus Disease (COVID-19) Vaccine? <i>Value in Health</i> 2021;24(5):625-31.                                                    | Article          | Proposes the Benefit-Based Advance Market Commitment as a collaborative, market-based financing mechanism for the world to incentivize and pay for the development and provide equitable access to second and third generation COVID-19 vaccines. |
| 39 | Turner M. Vaccine procurement during an influenza pandemic and the role of Advance Purchase Agreements: Lessons from 2009-H1N1. <i>Glob Public Health</i> 2016;11(3):322-35.                              | Article          | A case study on the procurement of pandemic influenza vaccines during 2009-H1N1, and the likely manner in which procurement will occur during future pandemics.                                                                                   |
| 40 | Usher AD. COVID-19 vaccines for all? <i>Lancet (London, England)</i> 2020;395(10240):1822-23.                                                                                                             | World report     | Provides an assessment of the initiatives being planned to ensure equitable access to COVID-19 vaccines, and shortcomings.                                                                                                                        |
| 41 | Usher AD. CEPI criticised for lack of transparency. <i>Lancet</i> 2021;397(10271):265-66.                                                                                                                 | World Report     | Provides insights and perspectives on CEPI contracts for COVID-19 vaccines.                                                                                                                                                                       |
| 42 | Usher AD. South Africa and India push for COVID-19 patents ban. <i>Lancet</i> 2020;396(10265):1790-91.                                                                                                    | World Report     | Report on the proposal by India and South Africa to waiver Intellectual Property Rights to COVID-19 products (incl. vaccines).                                                                                                                    |
| 43 | Wouters OJ, Shadlen KC, Salcher-Konrad M, et al. Challenges in ensuring global access to COVID-19 vaccines: production, affordability, allocation, and deployment. <i>Lancet</i> 2021;397(10278):1023-34. | Article          | Reviews potential challenges and policy implications for the production, affordable pricing, and global allocation of Covid-19 vaccines.                                                                                                          |
| 44 | Yamey G, Schäferhoff M, Hatchett R, et al. Ensuring global access to COVID-19 vaccines. <i>Lancet (London, England)</i> 2020;395(10234):1405-06.                                                          | Commentary       | Discusses how COVID-19 vaccines can be used globally to end the COVID-19 pandemic, arguing for three imperatives: speed, manufacture and deployment at scale, and global access.                                                                  |

1  
2  
3  
4  
5  
6  
7  
8  
9  
10 Appendix 2: Updated protocol  
11  
12  
13  
14  
15  
16

17  
18  
19  
20  
21  
22  
23  
24  
25

# Factors influencing global equitable access to a COVID-19 vaccine for Low- and Middle- Income Countries (LMICs)

---

26 Proposal for scoping review

27  
28 24 September 2020

29  
30 Elizabeth Peacocke, Lumbwe Chola, Katrine Frønsdal and Marita Fønhus, Norwegian  
31 Institute Public Health.  
32

33  
34 Updated 24 July 2021

35  
36 Elizabeth Peacocke, Lieke Fleur Heupink, Katrine Frønsdal, Elin Hoffmann Dahl and  
37 Lumbwe Chola.  
38  
39  
40  
41  
42  
43  
44  
45  
46  
47  
48  
49  
50  
51  
52  
53  
54  
55  
56  
57  
58  
59  
60

# Summary

Vaccines are important medical countermeasures to prevent the spread of infectious diseases. The World Bank forecasts a 5.2% contraction in global GDP in 2020, and long-term negative impacts are expected in terms of lower investment, an erosion of human capital through lost work and schooling, and fragmentation of global trade and supply linkages (1) Without effective vaccines, diagnostics, and therapeutics, COVID-19 will continue to spread and have severe health and socio-economic consequences. The UN's Framework for the Immediate Socio-Economic Response to the COVID 19 Crisis warns "The COVID-19 pandemic is far more than a health crisis: it is affecting societies and economies at their core. While the impact of the pandemic will vary from country to country, it will most likely increase poverty and inequalities at a global scale, making achievement of SDGs even more urgent." (2)

This project includes a scoping review that identifies and characterizes the factors influencing global equitable access to COVID-19 vaccines among countries, and contextualizes these factors with global mechanisms or guidelines that address global equitable access to pandemic vaccines. The documentation of these factors will offer decision makers lessons from previous experiences and information to support the understanding of principles related to equitable access to a COVID-19 vaccine.

This scoping review was conducted during August-November 2020, with a draft report for Norad, who commissioned and partly financed the report. This draft report was then submitted as a manuscript for publication. During the review process, in May 2021, the authors updated the search. This protocol has been updated to reflect the methods used in this Scoping Review.

To our knowledge, such a scoping review has not been systematically investigated.

## Title:

Factors influencing global equitable access to a COVID-19 vaccine for Low- and Middle- Income Countries (LMICs)

-----  
Proposal for scoping review  
-----

## Commissioned by:

Commissioned by the Norad Evaluation Department  
-----

## Start date:

24.07.2020.

## End date:

19.07.2021  
-----

## Project Team:

Elizabeth Peacocke, Senior Advisor, NIPH  
Lieke Fleur Heupink, Advisor, NIPH  
Elin Hoffmann Dahl, MD, Haukeland Universitetssjukehus, Norway  
Katrine Frønsdal, Senior Researcher, NIPH  
Lumbwe Chola, Senior Advisor, NIPH  
-----

## Internal peer review:

Maria Fønhus, Senior researcher, NIPH

## Approved by:

Ingvil Sæterdal, Department Director, NIPH, Global Health

---

# Background

---

## New Corona Virus: SARS-CoV-2 (COVID-19) Pandemic

---

The world is currently facing a global public health emergency with the emergence of the Severe acute respiratory syndrome coronavirus 2 discovered in 2019 (COVID-19), an infectious acute respiratory disease caused by a novel coronavirus. A race to increase access to existing health technologies – including diagnostics - and find new and effective treatments and vaccine is underway, and with this the international community is faced with the challenge of how to ensure equitable access of essential medicines<sup>1</sup> to all populations. In this scoping review, we will systematically review the literature and summarize factors pertaining to the equitable access of a COVID-19 vaccine relevant for low- and middle- income countries (LMICs). For the purpose of this study, we are using the WHO definition of equity,<sup>2</sup> and we take the principle that the COVID-19 vaccine is an essential medicine<sup>3</sup>, and that access to essential medicines is part of the right to health which is well founded in international law (4).

---

## The challenge with global equitable availability and access to pandemic vaccines

---

COVID-19 has seen a large effort and investment in vaccines, and diagnostics, with 22 manufacturers that have applied for and Emergency Use Listing under the WHO Pre-Qualification, 10 of which have been approved (5). Shortly following these rapid advances and regulatory approvals, questions began to be raised about the availability and access of vaccines in LMIC, and as global public goods (6, 7).

The 2005 experience with the sharing of avian influenza A (H5N1) and the 2009 influenza A (H1N1) pandemic made apparent the need for equity considerations and ensuring that global coordination and distribution mechanisms are in place and adhered to, supporting equitable access to scarce vaccines. During H5N1, concerns raised by LMICs about the lack of mechanisms for ensuring global equitable access to vaccines prompted Indonesia to refuse to share H5N1 virus samples with the World Health Organization (WHO) (8). With Asia being the epicenter of the outbreak, fears were raised by the international community that Indonesia's refusal to share virus samples would impede the research and development, surveillance and response efforts, and made the response to the global health emergency more difficult. Ensuing negotiations with the

---

<sup>1</sup>Essential medicines are those that satisfy the priority health care needs of the population 3. World Health Organization. Essential medicines and health products. Essential medicines definition 2020 [cited 2020 August 13]. Available from: [https://www.who.int/medicines/services/essmedicines\\_def/en/](https://www.who.int/medicines/services/essmedicines_def/en/).

<sup>2</sup>Equity is the absence of avoidable, unfair, or remediable differences among groups of people, whether those groups are defined socially, economically, demographically or geographically or by other means of stratification. "Health equity" or "equity in health" implies that ideally everyone should have a fair opportunity to attain their full health potential and that no one should be disadvantaged from achieving this potential (World Health Organization. Health Topics: Health Equity. 2020 [cited 2020 August 12]; Available from: [https://www.who.int/topics/health\\_equity/en/](https://www.who.int/topics/health_equity/en/)).

<sup>3</sup> WHO (2020)



1 WHO and its member states to create a new system of influenza virus sharing and vac-  
2 cine availability did not immediately yield consensus.  
3

4 During the 2009 pandemic, high income countries (HIC) bought virtually all vaccine  
5 supplies, leaving limited supplies for LMICs. One prominent example for this asym-  
6 metry was Mexico. Despite it being one of the first nations affected by H1N1 (concur-  
7 rently with Canada and the United States), Mexico gained access to vaccines much later  
8 than the two other countries (9). The WHO intervened to mediate this potential chal-  
9 lenge, engaging in talks with manufacturers and LMIC governments to secure equitable  
10 access to the vaccine for LMIC (10). Consequently, donation pledges to LMIC were  
11 made by manufacturers and HICs, with the exception of Canada (10, 11). These pledges  
12 from manufacturers were made without a fixed delivery date and were perceived to  
13 leave HICs with more than enough vaccines for full coverage in their own countries,  
14 leaving LMICs with limited access to timely supplies (11).  
15  
16  
17

---

## 18 **Lessons from previous collective responses to support global equitable ac- 19 cess to vaccines**

---

22 In response to the H5N1 and H1N1 experiences, WHO and member states developed  
23 and adopted the Pandemic Influenza Preparedness (PIP) framework in 2011, a global  
24 approach to pandemic influenza preparedness and response (12). The intention of PIP  
25 was to improve and strengthen the sharing of influenza viruses with human pandemic  
26 potential; and to share the benefit of, which is to increase the access of LMICs to vac-  
27 cines and other pandemic related supplies. There are, however, several gaps in the  
28 framework, not least, that it is not legally binding (13).  
29  
30

31 There are other relevant frameworks and mechanisms, such as establishing the Ad-  
32 vanced Market Commitment for AMC for Pneumonia Vaccine, and the Pan Americal  
33 Health Organisation's Revolving Fund for Vaccines. Much can be learnt from these  
34 initiatives that is relevant to the current COVID-19 pandemic. Recent events related to  
35 COVID-19 have shown some countries and technology holders' tendencies to control  
36 the global supply of personal protective equipment, ventilators, diagnostics and thera-  
37 peutic medicines and reserve supply to HIC, as well as the challenges with limited man-  
38 ufacturing capacity and access to know-how, intellectual property and data; indicating  
39 that it is highly likely that similar controls will be placed on a vaccine that meets the  
40 necessary safety, efficacy and regulatory standards, to be used for mass vaccination  
41 (14).  
42  
43

44 To manage anticipated issues with the distribution of COVID-19 vaccine, the WHO is  
45 convening the Access to COVID-19 Tools (ACT) Accelerator, which brings together gov-  
46 ernments, scientists, businesses, civil society, and philanthropists and global health or-  
47 ganizations (the Bill & Melinda Gates Foundation, CEPI, FIND, Gavi, The Global Fund,  
48 Unitaid, Wellcome, the World Bank and Global Financing Facility), in efforts to support  
49 the development and equitable distribution of the tests, treatments and vaccines. The  
50 ACT-Accelerator is organized into four pillars of work: diagnostics, treatment, vaccines  
51 and health system strengthening (15). Gavi and CEPI are leading implementation of the  
52 vaccines pillar, "the COVID-19 vaccine global access (COVAX) facility", which is commit-  
53 ted to supporting the acute phase of the pandemic through the appropriate allocation  
54 of safe and effective doses of a vaccine (16, 17).  
55  
56

57 The barriers in access to medicines to COVID-19 vaccines relate the demand and the  
58 supply of the vaccine, and there continues to be unprecedented demand for a safe and  
59 effective vaccine (18, 19). The supply of this vaccine is hampered by complex vaccine  
60

1 innovation and manufacturing processes. Depending on the candidates that prove to be  
2 the most effective, the approach used will determine the necessary manufacturing ca-  
3 pacity and length of time for development, (19). In terms of the quantity of the vaccine  
4 needed to be produced, this is also influenced by whether one or two does are neces-  
5 sary, in addition other challenges including e.g. with lack or insufficient global vaccine  
6 manufacturing capacity & access to know-how and implementation in LMIC countries  
7 are also essential for access to vaccines for many. All of these factors will limit the sup-  
8 ply of vaccines.  
9

---

## 11 Importance of the project

---

14 The access to, and distribution of a scarce vaccine is one of the pegged solutions to ena-  
15 ble the world to return some semblance of life pre-COVID 19. With COVID-19 affecting  
16 the world, the equitable distribution of this vaccine is important because the virus will  
17 cause unnecessary disability and loss of life unless the benefit of a vaccine is distrib-  
18 uted fairly among and within countries. To our knowledge, a scoping review of the the  
19 factors for the equitable access of a COVID-19 vaccine relevant for LMIC has not been  
20 systematically investigated. The project is considered highly relevant to the current sit-  
21 uation as it aims at identifying and describing of these factors which can inform deci-  
22 sion makers in terms of lessons from previous experiences and supporting the under-  
23 standing of principles related to equitable access to a COVID-19 vaccine, and further  
24 potentially guide implementation of future initiatives to ensure equitable access.  
25  
26  
27  
28

---

## 29 Objective

---

32 This objective of this scoping review is to identify and summarize the factors for the eq-  
33 uitable access of a COVID-19 vaccine relevant for LMICs. We will address the following  
34 question: *What are the factors influencing global equitable access to a COVID-19 vaccine*  
35 *among countries?*  
36  
37  
38  
39  
40  
41  
42  
43  
44  
45  
46  
47  
48  
49  
50  
51  
52  
53  
54  
55  
56  
57  
58  
59  
60

# Methods

## Scoping searches

We will perform systematic scoping searches for publications according to PRISMA-ScR (Preferred Reporting Items for Systematic reviews and Meta-Analyses extension for Scoping Reviews) (20).

### Inclusion criteria

We aim to identify and describe factors influencing global equitable access to a COVID-19 vaccine among countries as identified in our search (see the manuscript supplementary material), following the inclusion criteria shown in Table 1.

Table 1. Inclusion criteria

|                            |                                                                                       |
|----------------------------|---------------------------------------------------------------------------------------|
| <b>Topic</b>               | Pandemic vaccines incl. influenza or COVID-19 vaccine                                 |
| <b>Outcomes</b>            | The factors influencing equitable access to a pandemic vaccine incl. COVID-19 vaccine |
| <b>Type of publication</b> | Primary studies, systematic reviews                                                   |
| <b>Language</b>            | English                                                                               |
| <b>Publication date</b>    | 2002-2021                                                                             |

Restriction to publications from 2002 are made as a pragmatic choice from the date of the 2003-04 SARS pandemic. Furthermore, the limitation to English language journal articles in scientific databases was balancing completeness with the resources available.

### Search strategy and Information sources:

An information specialist at NIPH will develop the search strategies together with the project leader, and another information specialist will review the search strategy. The literature search will be conducted in the following databases: Medline (PubMed and Ovid), EMBASE (Ovid), Global Index Medicus, WHO <https://www.globalindexmedicus.net/> and Web of Science Core Collection Clarivate Analytics (see supplementary information for updated search strategies and databases).

Additional relevant information will be searched from websites of multilateral agencies and international philanthropic agencies identified in the literature through the database search (e.g. WHO Pandemic Influenza Preparedness Framework) as a means to understand the particular framework or initiative.

### Selection of literature

#### First screening

1 We will first review articles that are determined to be relevant (according to prede-  
2 fined inclusion criteria described above). Three project team members (EP, LF and LC)  
3 will independently go through all identified titles and abstracts and determine if arti-  
4 cles should be included for full-text review.  
5  
6

7  
8 Where there are divergent views, inclusion will be determined through discussion and  
9 consensus between the reviewers or by consulting a fourth team member (KF). Rec-  
10 ords not fulfilling the inclusion criteria will be excluded.  
11  
12

### 13 **Full text review**

14 Given time constraints, the review group will divide the studies by two and each study  
15 will be read in full and assessed for inclusion by one reviewer. This is verified by a sec-  
16 ond reviewer. Disagreement over exclusion or inclusion will be handled in the same  
17 way as for the first screening.  
18  
19

### 20 **Extraction and presentation of data**

21 Data to be extracted are mainly qualitative data on the predefined outcomes. Standard  
22 data extraction templates were designed, and piloted specifically for this scoping re-  
23 view (see the manuscript supplementary material for a copy of the data extraction  
24 form).  
25  
26

27  
28 The predefined outcomes for extracting data include: the setting (LMIC or globally fo-  
29 cused or normative guidance that affects LMIC), and argument/ discussion on equity,  
30 access, allocation or prioritization of pandemic vaccines, other aspects that article tells  
31 us about the knowledge in this topic area, challenges in implementing equitable access  
32 to vaccination between countries, and recommendations for strengthening the equita-  
33 ble access to vaccination. In addition, we collected names of relevant global initiatives  
34 and mechanisms as identified in our search. Data is to be extracted by one team mem-  
35 ber and a second reviewer will review the data extraction.  
36  
37  
38  
39

### 40 **Analysis of data**

41 The analysis of the data collected will provide information on the body of research and  
42 evaluations related to the factors influencing global equitable access to a COVID-19 vac-  
43 cine among countries. Our analysis will include how factors influencing global equitable  
44 access to a COVID-19 vaccine among countries pertain to global frameworks and mech-  
45 anisms identified in our searches.  
46  
47  
48

49 We will consider using the following framework for analysis, adapted from Liu et al  
50 (21), which includes three main areas related to:

- 51 - A country's ability to develop or to purchase pandemic vaccines
- 52 - Reciprocity
- 53 - A country's ability to implement or vaccinate.  
54  
55  
56  
57  
58  
59  
60

---

## Reporting, submission of manuscript and updating of search

---

A draft report based on the findings from the scoping review was prepared and presented to Norad and two external peer reviewers. A manuscript was then prepared and submitted to BMJ Open in January 2021. Based on feedback from peer review, the search was updated in May 2021.

---

## Risk of bias and limitations

---

Due to time constraints we are extracting data directly related to our topic of interest. This will mean that some papers are excluded due to their lack of direct relevance to our question, and will not be included in the analysis.

Only one reviewer will complete the full-text review and data extraction, to limit the risk of bias, one reviewer will peer review the full-text categorisation and data extraction.

---

## Peer –review

---

External and internal peer review is being used to strengthen the methods and improve the rigor of this scoping review.

### Internal:

The project plan (this document) has been reviewed by all authors and peer reviewed internally at NIPH. Internal reviewers at NIPH will also review any publication of results presented to Norad.

### External:

Two external peer reviewers will be used in addition before publication of results.

---

## Acronyms

---

|          |                                                     |
|----------|-----------------------------------------------------|
| CEPI     | Coalition for Epidemic Preparedness Innovations     |
| COVAX    | the COVID-19 vaccine global access (COVAX) facility |
| COVID-19 | 2019 Pandemic corona virus strain                   |
| CIS      | Critical Interpretive Synthesis                     |
| DNA      | Deoxyribonucleic acid                               |
| Gavi     | Gavi, the Vaccine Alliance                          |
| FIND     | the Foundation for Innovative New Diagnostics       |
| HIC      | High income countries                               |
| H1N1     | 2009 influenza A                                    |
| H5N1     | 2006 avian influenza A                              |
| LMIC     | Low- and Middle- income countries                   |

# References

1. Bank TW. The Global Economic Outlook During the COVID-19 Pandemic: A Changed World: The World Bank; 2020 [updated June 8 2020; cited 2020 September 23]. Available from: <https://www.worldbank.org/en/news/feature/2020/06/08/the-global-economic-outlook-during-the-covid-19-pandemic-a-changed-world>.
2. United Nations. A UN framework for the immediate socio-economic response to COVID-19. New York: United Nations; 2020.
3. World Health Organization. Essential medicines and health products. Essential medicines definition 2020 [cited 2020 August 13]. Available from: [https://www.who.int/medicines/services/essmedicines\\_def/en/](https://www.who.int/medicines/services/essmedicines_def/en/).
4. World Health Organization. Access to essential medicines as part of the right to health 2020 [cited 2020 August 13]. Available from: [https://www.who.int/medicines/areas/human\\_rights/en/](https://www.who.int/medicines/areas/human_rights/en/).
5. World Health Organization. Status of COVID-19 Vaccines within WHO Emergency Use Listing / Pre-Qualification 2021 [updated 15 July 2021; cited 2021 24 July]. Available from: <https://www.who.int/emergencies/diseases/novel-coronavirus-2019/covid-19-vaccines>.
6. Bollyky TJ, Gostin LO, Hamburg MA. The equitable distribution of COVID-19 therapeutics and vaccines. *Jama*. 2020.
7. Gopinathan U, Peacocke E, Gouglas D, Ottersen T, Røttingen J-A. R&D for Emerging Infectious Diseases of Epidemic Potential: Sharing Risks and Benefits Through a New Coalition. *Infectious Diseases in the New Millennium*: Springer; 2020. p. 137-65.
8. Fidler DP. Negotiating equitable access to influenza vaccines: global health diplomacy and the controversies surrounding avian influenza H5N1 and pandemic influenza H1N1. *PLoS Med*. 2010;7(5):e1000247.
9. Jefferies N. Levelling the playing field? Sharing of influenza viruses and access to vaccines and other benefits. *Journal of Law and Medicine*. 2012;20(1):59-72.
10. Organization WH. Report of the WHO pandemic influenza A (H1N1) vaccine deployment initiative. 2012.
11. Fidler DP. Negotiating equitable access to influenza vaccines: global health diplomacy and the controversies surrounding avian influenza H5N1 and pandemic influenza H1N1. *Negotiating and Navigating Global Health: Case Studies in Global Health Diplomacy*: World Scientific; 2012. p. 161-72.
12. World Health Organization. Pandemic influenza preparedness framework for the sharing of influenza viruses and access to vaccines and other benefits. 2011.
13. Fidler DP, Gostin LO. The WHO pandemic influenza preparedness framework: A milestone in global governance for health. *JAMA - Journal of the American Medical Association*. 2011;306(2):200-1.
14. Jakes L. U.S. Limits Virus Aid for Masks, Gloves and Other Medical Gear Abroad New York2020 [updated June 9 2020. Available from: <https://www.nytimes.com/2020/06/09/us/politics/coronavirus-international-aid-masks.html>.
15. WHO. The Access to COVID-19 Tools (ACT) Accelerator: WHO; 2020 [cited 2020 August 3]. Available from: <https://www.who.int/initiatives/act-accelerator>.
16. Gavi the Vaccine Alliance. COVAX, the act-accelerator vaccines pillar- Insuring accelerated vaccine development and manufacture: Gavi; 2020 [cited 2020 August 3]. Available from: <https://www.gavi.org/sites/default/files/covid/COVAX-Pillar-background.pdf>.
17. World Health Organization. A global framework to ensure equitable and fair allocation of Covid-19 products. In: WHO, editor. Geneva: WHO; 2020.

- 1 18. Bigdeli M, Jacobs B, Tomson G, Laing R, Ghaffar A, Dujardin B, et al. Access to  
2 medicines from a health system perspective. *Health policy and planning*.  
3 2013;28(7):692-704.
- 4 19. Khamsi R. If a coronavirus vaccine arrives, can the world make enough. *Nature*.  
5 2020 April 9 2020.
- 6 20. Tricco AC, Lillie E, Zarin W, O'Brien KK, Colquhoun H, Levac D, et al. PRISMA  
7 extension for scoping reviews (PRISMA-ScR): checklist and explanation. *Ann Intern*  
8 *Med*. 2018;169(7):467-73.
- 9 21. Liu Y, Salwi S, Drolet BC. Multivalue ethical framework for fair global allocation of  
10 a COVID-19 vaccine. *J Med Ethics*. 2020;46(8):499-501.
- 11
- 12
- 13
- 14
- 15
- 16
- 17
- 18
- 19
- 20
- 21
- 22
- 23
- 24
- 25
- 26
- 27
- 28
- 29
- 30
- 31
- 32
- 33
- 34
- 35
- 36
- 37
- 38
- 39
- 40
- 41
- 42
- 43
- 44
- 45
- 46
- 47
- 48
- 49
- 50
- 51
- 52
- 53
- 54
- 55
- 56
- 57
- 58
- 59
- 60

For peer review only

### Appendix 3: Search strategies for each of the five databases (*Initially searched for the period 01.01.2002 - 28.08.2020, updated to include 12.05.2021*)

#### Databases searched

- MEDLINE ALL 2002 to May 11, 2021
  - o Ovid MEDLINE, PubMed (only 28.08.2020);
  - o Ovid MEDLINE(R) and Epub Ahead of Print, In-Process & Other Non-Indexed Citations and Daily 2002 to August 27, 2020
- Embase 2002 to 2021, Ovid
- Web of Science Core Collection, Clarivate Analytics
- Global Index Medicus, WHO
- COVID-19 Evidence, Epistemonikos Foundation

#### **Updated search 12.05.2021**

We searched:

- **PubMed, US National Library of Medicine (NLM):** [pubmed.ncbi.nlm.nih.gov/](http://pubmed.ncbi.nlm.nih.gov/)  
Only 28.08.2020 as string was not available in 2021.

- **MEDLINE ALL 1946 to May 11, 2021, Ovid (searched 12.05.2021)**

| #  | Searches                                                                                                                                          | Results |
|----|---------------------------------------------------------------------------------------------------------------------------------------------------|---------|
| 1  | COVID-19 Vaccines/                                                                                                                                | 2510    |
| 2  | Coronavirus/                                                                                                                                      | 4692    |
| 3  | Betacoronavirus/                                                                                                                                  | 33218   |
| 4  | Coronavirus Infections/                                                                                                                           | 44847   |
| 5  | Coronaviridae Infections/                                                                                                                         | 919     |
| 6  | Severe Acute Respiratory Syndrome/                                                                                                                | 5545    |
| 7  | Pandemics/                                                                                                                                        | 56289   |
| 8  | (COVID-19 or COVID 19 or COVID19 or 2019-nCoV or SARS2 or SARS-CoV or SARS-CoV-2 or SARS-Cov-19 or coronavirus* or corona or pandemic?).ti,ab,kf. | 177584  |
| 9  | (BNT162 or BNT-162 or mRNA-1273 or mRNA1273 or INO-4800 or INO4800 or ChAdOx1 or Ad5-nCoV).ti,ab,kf,hw.                                           | 218     |
| 10 | or/2-9                                                                                                                                            | 184722  |
| 11 | Vaccines/                                                                                                                                         | 22577   |
| 12 | Viral Vaccines/                                                                                                                                   | 27055   |
| 13 | Vaccination/                                                                                                                                      | 85401   |
| 14 | Vaccination Coverage/                                                                                                                             | 1540    |
| 15 | Mass Vaccination/                                                                                                                                 | 3208    |
| 16 | Immunization/                                                                                                                                     | 51563   |
| 17 | Immunization Programs/                                                                                                                            | 11524   |
| 18 | (vaccin* or immuni*).ti,ab,kf.                                                                                                                    | 576919  |
| 19 | or/11-18                                                                                                                                          | 610926  |
| 20 | "Delivery of Health Care"/                                                                                                                        | 95912   |



|    |                                                                                                                                                                              |         |
|----|------------------------------------------------------------------------------------------------------------------------------------------------------------------------------|---------|
| 21 | "Health Services Needs and Demand"/                                                                                                                                          | 54005   |
| 22 | Resource Allocation/                                                                                                                                                         | 8895    |
| 23 | Health Care Rationing/                                                                                                                                                       | 11853   |
| 24 | Health Services Accessibility/                                                                                                                                               | 78488   |
| 25 | Health Equity/                                                                                                                                                               | 1805    |
| 26 | Right to Health/                                                                                                                                                             | 131     |
| 27 | Universal Health Care/                                                                                                                                                       | 149     |
| 28 | Healthcare Disparities/                                                                                                                                                      | 18787   |
| 29 | Socioeconomic Factors/                                                                                                                                                       | 162607  |
| 30 | Social Justice/                                                                                                                                                              | 12551   |
| 31 | Global Health/                                                                                                                                                               | 50200   |
| 32 | Human Rights/                                                                                                                                                                | 14729   |
| 33 | ((equit* or equal* or fair* or inequit* or unequal or unfair* or global*) adj3 (access* or allocat* or distribut* or deliver* or provision or supply or supplies)).ti,ab,kf. | 32465   |
| 34 | (right to health* or universal health*).ti,ab,kf.                                                                                                                            | 7779    |
| 35 | ((health* or health care) adj (rationing or disparities)).ti,ab,kf.                                                                                                          | 15193   |
| 36 | or/20-35                                                                                                                                                                     | 488375  |
| 37 | 10 and 19 and 36                                                                                                                                                             | 1157    |
| 38 | 1 and 36                                                                                                                                                                     | 280     |
| 39 | 37 or 38                                                                                                                                                                     | 1194    |
| 40 | (202008* or 202009* or 202010* or 202011* or 202012* or 2021*).dt,dp,ed,ep,yr.                                                                                               | 1805737 |
| 41 | 39 and 40                                                                                                                                                                    | 588     |
| 42 | 38 or 41                                                                                                                                                                     | 608     |

• Embase 1974 to 2021 Week 18 (searched 12.05.2021)

| # | Searches                                                                                                                                    | Results |
|---|---------------------------------------------------------------------------------------------------------------------------------------------|---------|
| 1 | SARS-CoV-2 vaccine/                                                                                                                         | 2292    |
| 2 | coronavirus disease 2019/                                                                                                                   | 106145  |
| 3 | coronavirinae/                                                                                                                              | 3003    |
| 4 | betacoronavirus/                                                                                                                            | 7651    |
| 5 | coronavirus infection/                                                                                                                      | 12666   |
| 6 | coronaviridae infection/                                                                                                                    | 187     |
| 7 | pandemic/                                                                                                                                   | 65235   |
| 8 | (COVID-19 or COVID 19 or COVID19 or 2019-nCoV or SARS2 or SARS-CoV or SARS-CoV-2 or SARS-Cov-19 or coronavirus* or corona or pandemic?).mp. | 195467  |

|    |                                                                                                                                                                                 |        |
|----|---------------------------------------------------------------------------------------------------------------------------------------------------------------------------------|--------|
| 9  | (BNT162 or BNT-162 or mRNA-1273 or mRNA1273 or INO-4800 or INO4800 or ChAdOx1 or Ad5-nCoV).mp.                                                                                  | 355    |
| 10 | or/3-9                                                                                                                                                                          | 195821 |
| 11 | vaccine/                                                                                                                                                                        | 63516  |
| 12 | virus vaccine/                                                                                                                                                                  | 20586  |
| 13 | severe acute respiratory syndrome vaccine/                                                                                                                                      | 453    |
| 14 | vaccination/                                                                                                                                                                    | 151179 |
| 15 | vaccination coverage/                                                                                                                                                           | 2788   |
| 16 | immunization/                                                                                                                                                                   | 98822  |
| 17 | mass immunization/                                                                                                                                                              | 3739   |
| 18 | (vaccin* or immuni*).ti,ab,kw,ot.                                                                                                                                               | 685955 |
| 19 | or/11-18                                                                                                                                                                        | 736294 |
| 20 | health care delivery/                                                                                                                                                           | 184159 |
| 21 | resource management/                                                                                                                                                            | 10987  |
| 22 | resource allocation/                                                                                                                                                            | 22438  |
| 23 | health care access/                                                                                                                                                             | 69640  |
| 24 | health care quality/                                                                                                                                                            | 250577 |
| 25 | health equity/                                                                                                                                                                  | 4605   |
| 26 | right to health/                                                                                                                                                                | 214    |
| 27 | universal health care/                                                                                                                                                          | 337    |
| 28 | health care disparity/                                                                                                                                                          | 17595  |
| 29 | socioeconomics/                                                                                                                                                                 | 147326 |
| 30 | social justice/                                                                                                                                                                 | 11121  |
| 31 | global health/                                                                                                                                                                  | 12881  |
| 32 | human rights/                                                                                                                                                                   | 26721  |
| 33 | ((equit* or equal* or fair* or inequit* or unequal or unfair* or global*) adj3 (access* or allocat* or distribut* or deliver* or provision or supply or supplies)).ti,ab,kw,ot. | 42137  |
| 34 | (right to health* or universal health*).ti,ab,kw,ot.                                                                                                                            | 9211   |
| 35 | ((health* or health care) adj (rationing or disparities)).ti,ab,kw,ot.                                                                                                          | 19032  |
| 36 | or/20-35                                                                                                                                                                        | 714178 |
| 37 | 10 and 19 and 36                                                                                                                                                                | 1372   |
| 38 | 1 and 36                                                                                                                                                                        | 266    |
| 39 | 2 and 19 and 36                                                                                                                                                                 | 692    |
| 40 | or/37-39                                                                                                                                                                        | 1423   |
| 41 | limit 40 to (conference abstracts or embase)                                                                                                                                    | 1129   |
| 42 | limit 37 to (conference abstracts or embase)                                                                                                                                    | 1078   |

|    |                                                                          |         |
|----|--------------------------------------------------------------------------|---------|
| 43 | (202008* or 202009* or 202010* or 202011* or 202012* or 2021*).dd,em,yr. | 1850404 |
| 44 | 42 and 43                                                                | 439     |
| 45 | limit 38 to (conference abstracts or embase)                             | 259     |
| 46 | limit 39 to (conference abstracts or embase)                             | 652     |
| 47 | 44 or 45 or 46                                                           | 751     |
| 48 | 47 use oemez                                                             | 751     |

- **Web of Science, Clarivate Analytics** (searched 12.05.2021)

Advanced search - Topic

COVID-19 OR "COVID 19" OR COVID19 OR 2019-nCoV OR "2019 nCoV" OR SARS2 OR SARS-CoV OR "SARS CoV" OR SARS-CoV-2 OR "SARS CoV 2" OR SARS-Cov-19 OR "SARS Cov 19" OR coronavirus OR corona OR pandemic OR pandemics

AND

vaccin\* OR immuni\*

AND

equity OR equitable OR equal OR equally OR inequity OR inequitable OR unequal OR unequally OR fair\* OR unfair\* OR "right to health" OR "right to healthcare" OR "universal health" OR "universal healthcare" OR "healthcare rationing" OR "health care rationing" OR "healthcare disparity" OR "healthcare disparity" OR "healthcare disparities" OR "healthcare disparities"

- **Global Index Medicus, WHO:** [www.globalindexmedicus.net](http://www.globalindexmedicus.net) (searched 14.05.2021)

Advanced search in Title, abstract, subject

COVID-19 OR "COVID 19" OR COVID19 OR 2019-nCoV OR "2019 nCoV" OR SARS2 OR SARS-CoV OR "SARS CoV" OR SARS-CoV-2 OR "SARS CoV 2" OR SARS-Cov-19 OR "SARS Cov 19" OR coronavirus OR corona OR pandemic OR pandemics

AND

vaccine OR vaccines OR vaccination OR immunization OR immunisation

AND

equity OR equitable OR equal OR equally OR inequity OR inequitable OR unequal OR unequally OR fair\* OR unfair\* OR "right to health" OR "right to healthcare" OR "universal health" OR "universal healthcare" OR "healthcare rationing" OR "health care rationing" OR "healthcare disparity" OR "healthcare disparity" OR "healthcare disparities" OR "healthcare disparities" OR global OR globally

- **COVID-19 Evidence, Epistemonikos Foundation:**

[app.iloveevidence.com/loves/5e6fdb9669c00e4ac072701d?utm=epdb\\_en](http://app.iloveevidence.com/loves/5e6fdb9669c00e4ac072701d?utm=epdb_en) (searched 14.05.2021)

(vaccin\* OR immuniz\* OR immuni\*) AND (equity OR equitable OR equal OR equally OR inequity OR inequitable OR unequal OR unequally OR fair\* OR unfair\* OR "right to health" OR "right to healthcare" OR "universal health" OR "universal healthcare" OR "healthcare rationing" OR "health care rationing" OR "healthcare disparity" OR "healthcare disparity" OR "healthcare disparities" OR "healthcare disparities" OR global OR globally) AND (access\* or allocat\* or distribut\* or deliver\* or provision or supply or supplies)

LIMITED TO Type of publication: Pre-print

### Original search of databases: 28.08.2020

- MEDLINE, PubMed (searched 28.08.2020)

MeSH: "COVID-19 vaccine" [Supplementary Concept]

**Ovid MEDLINE(R) and Epub Ahead of Print, In-Process & Other Non-Indexed Citations and Daily 1946 to August 27, 2020** (searched 28.08.2020)

| #  | Searches                                                                                                                                          | Results |
|----|---------------------------------------------------------------------------------------------------------------------------------------------------|---------|
| 1  | Coronavirus/                                                                                                                                      | 3244    |
| 2  | Betacoronavirus/                                                                                                                                  | 16530   |
| 3  | Coronavirus Infections/                                                                                                                           | 24138   |
| 4  | Coronaviridae Infections/                                                                                                                         | 906     |
| 5  | Severe Acute Respiratory Syndrome/                                                                                                                | 4873    |
| 6  | Pandemics/                                                                                                                                        | 24349   |
| 7  | (COVID-19 or COVID 19 or COVID19 or 2019-nCoV or SARS2 or SARS-CoV or SARS-CoV-2 or SARS-Cov-19 or coronavirus* or corona or pandemic?).ti,ab,kf. | 91205   |
| 8  | (BNT162 or BNT-162 or mRNA-1273 or mRNA1273 or INO-4800 or INO4800 or ChAdOx1 or Ad5-nCoV).ti,ab,kf,hw.                                           | 51      |
| 9  | or/1-8                                                                                                                                            | 97109   |
| 10 | Vaccines/                                                                                                                                         | 21690   |
| 11 | Viral Vaccines/                                                                                                                                   | 25884   |
| 12 | Vaccination/                                                                                                                                      | 81687   |
| 13 | Vaccination Coverage/                                                                                                                             | 1160    |
| 14 | Mass Vaccination/                                                                                                                                 | 3038    |
| 15 | Immunization/                                                                                                                                     | 50752   |
| 16 | Immunization Programs/                                                                                                                            | 10877   |
| 17 | (vaccin* or immuni*).ti,ab,kf.                                                                                                                    | 546309  |
| 18 | or/10-17                                                                                                                                          | 579947  |
| 19 | "Delivery of Health Care"/                                                                                                                        | 91173   |
| 20 | "Health Services Needs and Demand"/                                                                                                               | 53044   |
| 21 | Resource Allocation/                                                                                                                              | 8501    |
| 22 | Health Care Rationing/                                                                                                                            | 11514   |
| 23 | Health Services Accessibility/                                                                                                                    | 74764   |
| 24 | Health Equity/                                                                                                                                    | 1291    |
| 25 | Right to Health/                                                                                                                                  | 75      |
| 26 | Universal Health Care/                                                                                                                            | 80      |
| 27 | Healthcare Disparities/                                                                                                                           | 17030   |
| 28 | Socioeconomic Factors/                                                                                                                            | 157123  |
| 29 | Social Justice/                                                                                                                                   | 12160   |
| 30 | Global Health/                                                                                                                                    | 47402   |
| 31 | Human Rights/                                                                                                                                     | 14384   |

|    |                                                                                                                                                                              |        |
|----|------------------------------------------------------------------------------------------------------------------------------------------------------------------------------|--------|
| 32 | ((equit* or equal* or fair* or inequit* or unequal or unfair* or global*) adj3 (access* or allocat* or distribut* or deliver* or provision or supply or supplies)).ti,ab,kf. | 29976  |
| 33 | (right to health* or universal health*).ti,ab,kf.                                                                                                                            | 7053   |
| 34 | ((health* or health care) adj (rationing or disparities)).ti,ab,kf.                                                                                                          | 13345  |
| 35 | or/19-34                                                                                                                                                                     | 466021 |
| 36 | 9 and 18 and 35                                                                                                                                                              | 632    |

• **Embase 1974 to 2020 Week 34, Ovid (searched 28.08.2020)**

| #  | Searches                                                                                                                                                                        | Results |
|----|---------------------------------------------------------------------------------------------------------------------------------------------------------------------------------|---------|
| 1  | coronavirinae/                                                                                                                                                                  | 2268    |
| 2  | betacoronavirus/                                                                                                                                                                | 4632    |
| 3  | coronavirus infection/                                                                                                                                                          | 8485    |
| 4  | coronaviridae infection/                                                                                                                                                        | 166     |
| 5  | pandemic/                                                                                                                                                                       | 30028   |
| 6  | (COVID-19 or COVID 19 or COVID19 or 2019-nCoV or SARS2 or SARS-CoV or SARS-CoV-2 or SARS-Cov-19 or coronavirus* or corona or pandemic?).mp.                                     | 103695  |
| 7  | (BNT162 or BNT-162 or mRNA-1273 or mRNA1273 or INO-4800 or INO4800 or ChAdOx1 or Ad5-nCoV).mp.                                                                                  | 85      |
| 8  | or/1-7                                                                                                                                                                          | 103962  |
| 9  | vaccine/                                                                                                                                                                        | 60026   |
| 10 | virus vaccine/                                                                                                                                                                  | 19609   |
| 11 | severe acute respiratory syndrome vaccine/                                                                                                                                      | 385     |
| 12 | vaccination/                                                                                                                                                                    | 140276  |
| 13 | vaccination coverage/                                                                                                                                                           | 2060    |
| 14 | immunization/                                                                                                                                                                   | 94131   |
| 15 | mass immunization/                                                                                                                                                              | 3511    |
| 16 | (vaccin* or immuni*).ti,ab,kw,ot.                                                                                                                                               | 643022  |
| 17 | or/9-16                                                                                                                                                                         | 689815  |
| 18 | health care delivery/                                                                                                                                                           | 174154  |
| 19 | resource management/                                                                                                                                                            | 10271   |
| 20 | resource allocation/                                                                                                                                                            | 20867   |
| 21 | health care access/                                                                                                                                                             | 62445   |
| 22 | health care quality/                                                                                                                                                            | 241073  |
| 23 | health equity/                                                                                                                                                                  | 3269    |
| 24 | right to health/                                                                                                                                                                | 105     |
| 25 | universal health care/                                                                                                                                                          | 155     |
| 26 | health care disparity/                                                                                                                                                          | 15646   |
| 27 | socioeconomics/                                                                                                                                                                 | 140163  |
| 28 | social justice/                                                                                                                                                                 | 10427   |
| 29 | global health/                                                                                                                                                                  | 9804    |
| 30 | human rights/                                                                                                                                                                   | 24894   |
| 31 | ((equit* or equal* or fair* or inequit* or unequal or unfair* or global*) adj3 (access* or allocat* or distribut* or deliver* or provision or supply or supplies)).ti,ab,kw,ot. | 38602   |
| 32 | (right to health* or universal health*).ti,ab,kw,ot.                                                                                                                            | 8082    |
| 33 | ((health* or health care) adj (rationing or disparities)).ti,ab,kw,ot.                                                                                                          | 16415   |
| 34 | or/18-33                                                                                                                                                                        | 670545  |
| 35 | 8 and 17 and 34                                                                                                                                                                 | 672     |
| 36 | limit 35 to (conference abstracts or embase)                                                                                                                                    | 529     |

1  
2  
3  
4  
5  
6  
7  
8  
9  
10  
11  
12  
13  
14  
15  
16  
17  
18  
19  
20  
21  
22  
23  
24  
25  
26  
27  
28  
29  
30  
31  
32  
33  
34  
35  
36  
37  
38  
39  
40  
41  
42  
43  
44  
45  
46  
47  
48  
49  
50  
51  
52  
53  
54  
55  
56  
57  
58  
59  
60

- **Global Index Medicus, WHO** (searched 28.08.2020)

Advanced search in Title, abstract, subject

COVID-19 OR "COVID 19" OR COVID19 OR 2019-nCoV OR "2019 nCoV" OR SARS2 OR SARS-CoV OR "SARS CoV" OR SARS-CoV-2 OR "SARS CoV 2" OR SARS-Cov-19 OR "SARS Cov 19" OR coronavirus OR corona OR pandemic OR pandemics

AND

vaccine OR vaccines OR vaccination OR immunization OR immunisation

AND

equity OR equitable OR equal OR equally OR inequity OR inequitable OR unequal OR unequally OR unfair OR unfairly OR disparity OR disparities OR global OR globally

- **Web of Science, Clarivate Analytics** (searched 28.08.2020)

COVID-19 OR "COVID 19" OR COVID19 OR 2019-nCoV OR "2019 nCoV" OR SARS2 OR SARS-CoV OR "SARS CoV" OR SARS-CoV-2 OR "SARS CoV 2" OR SARS-Cov-19 OR "SARS Cov 19" OR coronavirus OR corona OR pandemic OR pandemics

AND

vaccin\* OR immuni\*

AND

equity OR equitable OR equal OR equally OR inequity OR inequitable OR unequal OR unequally OR unfair OR unfairly OR "right to health" OR "right to healthcare" OR "universal health" OR "universal healthcare" OR "healthcare rationing" OR "health care rationing" OR "healthcare disparity" OR "healthcare disparity" OR "healthcare disparities" OR "healthcare disparities"

#### Appendix 4: Excluded articles and reason for exclusion

**Reason for exclusion key:** 1: mentions issue but lacks detail or did not add new insight to factors related to equitable access, 2: discusses within, not amongst countries, 3: irrelevant, 4: not English, 5: full-text unavailable, 6: not in peer reviewed journal.

| Nr* | First author, year  | Title                                                                                                                                                                                 | Reason excluded |
|-----|---------------------|---------------------------------------------------------------------------------------------------------------------------------------------------------------------------------------|-----------------|
| 1   | Acharya, 2021       | Access to and equitable distribution of COVID-19 vaccine in low-income countries                                                                                                      | 1               |
| 2   | Anonymous, 2021     | Why a pioneering plan to distribute COVID vaccines equitably must succeed                                                                                                             | 1               |
| 3   | Anonymous, 2021     | It's time to consider a patent reprieve for COVID vaccines                                                                                                                            | 1               |
| 4   | Aryeetey, 2021      | A step backwards in the fight against global vaccine inequities                                                                                                                       | 1               |
| 5   | Bennett, 2010       | Law, ethics and pandemic preparedness: the importance of cross-jurisdictional and cross-cultural perspectives                                                                         | 1               |
| 6   | Binagwaho, 2021     | Equitable and Effective Distribution of the COVID-19 Vaccines - A Scientific and Moral Obligation                                                                                     | 1               |
| 7   | Burki, 2021         | Equitable distribution of COVID-19 vaccines                                                                                                                                           | 1               |
| 8   | Burki, 2021         | Challenges in the rollout of COVID-19 vaccines worldwide                                                                                                                              | 1               |
| 9   | Cohen, 2021         | As vaccines emerge, a global waiting game begins                                                                                                                                      | 1               |
| 10  | Emanuel, 2020       | An ethical framework for global vaccine allocation                                                                                                                                    | 1               |
| 11  | Ferguson, 2020      | Love thy neighbour? Allocating vaccines in a world of competing obligations                                                                                                           | 1               |
| 12  | Fisher, 2011        | Pandemic response lessons from influenza H1N1 2009 in Asia                                                                                                                            | 1               |
| 13  | Friede, 2011        | WHO initiative to increase global and equitable access to influenza vaccine in the event of a pandemic: supporting developing country production capacity through technology transfer | 1               |
| 14  | Garfinkel, 2020     | Survival of the Wealthiest?                                                                                                                                                           | 1               |
| 15  | Gostin, 2020        | Facilitating Access to a COVID-19 Vaccine through Global Health Law                                                                                                                   | 1               |
| 16  | Haaheim, 2009       | Pandemic influenza vaccines - the challenges                                                                                                                                          | 1               |
| 17  | Hay, 2018           | The WHO global influenza surveillance and response system (GISRS)-A future perspective                                                                                                | 1               |
| 18  | Herzog, 2021        | Covax must go beyond proportional allocation of covid vaccines to ensure fair and equitable access                                                                                    | 1               |
| 19  | Hessel, 2009        | Pandemic influenza vaccines: Meeting the supply, distribution and deployment challenges                                                                                               | 1               |
| 20  | Ho, 2020            | Global Disparity and Solidarity in a Pandemic                                                                                                                                         | 1               |
| 21  | Hurley, 2021        | It's self-interest to share our vaccines globally                                                                                                                                     | 1               |
| 22  | Kamradt-Scott, 2012 | Evidence-based medicine and the governance of pandemic influenza                                                                                                                      | 1               |
| 23  | Kim, 2021           | Operation Warp Speed: implications for global vaccine security                                                                                                                        | 1               |
| 24  | Kimble, 2021        | Considerations on the distribution and administration of the new COVID-19 vaccines                                                                                                    | 1               |
| 25  | Kupferschmidt, 2020 | Despite obstacles, WHO unveils plan to distribute vaccine                                                                                                                             | 1               |
| 26  | Lie, n.d.           | Allocating a COVID-19 Vaccine: Balancing National and International Responsibilities                                                                                                  | 1               |
| 27  | Lomazzi, 2020       | Equitable access to COVID-19 vaccination: a distant dream?                                                                                                                            | 1               |
| 28  | Megidido, 2020      | Fairer financing of vaccines in a world living with COVID-19                                                                                                                          | 1               |
| 29  | Meyer, 2020         | After a COVID-19 vaccine: Collaboration or competition?                                                                                                                               | 1               |
| 30  | Milstien, 2003      | Emergency response vaccines: Lessons learned in response to communicable diseases                                                                                                     | 1               |
| 31  | Munguia-Lopez, 2021 | Fair Allocation of Potential COVID-19 Vaccines Using an Optimization-Based Strategy                                                                                                   | 1               |
| 32  | Nannei, 2016        | Stakeholders' perceptions of 10years of the Global Action Plan for Influenza Vaccines (GAP) - Results from a survey                                                                   | 1               |

|    |                        |                                                                                                                                                              |   |
|----|------------------------|--------------------------------------------------------------------------------------------------------------------------------------------------------------|---|
| 33 | Nazar, 2020            | All for vaccine, vaccine for all                                                                                                                             | 1 |
| 34 | Nkengasong, 2020       | COVID-19 vaccines: how to ensure Africa has access                                                                                                           | 1 |
| 35 | Ogbogu, 2020           | Bioethics and practical justice in the post-COVID-19 era                                                                                                     | 1 |
| 36 | Orit Fischman, 2021    | A Global Pandemic Remedy to Vaccine Nationalism                                                                                                              | 1 |
| 37 | Punjabi, 2021          | Vaccine is health and health is wealth                                                                                                                       | 1 |
| 38 | Rodríguez Mega, 2020   | Latin American scientists join the coronavirus vaccine race: 'No one's coming to rescue us'                                                                  | 1 |
| 39 | Ropero-Alvarez, 2012   | Pandemic influenza vaccination: lessons learned from Latin America and the Caribbean                                                                         | 1 |
| 40 | Sadeghi, 2021          | The commitment for fair distribution of COVID-19 vaccine among all countries of the world.                                                                   | 1 |
| 41 | Schwartz, 2009         | Prioritization of pandemic influenza vaccine: Rationale and strategy for decision making                                                                     | 1 |
| 42 | Schwartz, 2020         | Equitable global access to coronavirus disease 2019 vaccines                                                                                                 | 1 |
| 43 | Sharun, 2021           | COVID-19 vaccine diplomacy and equitable access to vaccines amid ongoing pandemic                                                                            | 1 |
| 44 | The Lancet, 2020       | Global collaboration for health: rhetoric versus reality                                                                                                     | 1 |
| 45 | Usman, 2020            | After the Coronavirus Vaccine's Discovery: Concerns Regarding a COVID-19 Vaccination's Distribution                                                          | 1 |
| 46 | Yamada, 2009           | Poverty, wealth, and access to pandemic influenza vaccines                                                                                                   | 1 |
| 47 | Yen, 2015              | The development of global vaccine stockpiles                                                                                                                 | 1 |
| 48 | Zimmerman, 2007        | Rationing of influenza vaccine during a pandemic: ethical analyses                                                                                           | 1 |
| 49 | Abramowitz, 2020       | Transparent, equitable, safe, and effective use of COVID-19 vaccines: A societal imperative                                                                  | 2 |
| 50 | Adebambo Anthony, 2020 | Intellectual Property Rights, Pharmaceutical Patents and Public Health: Adopting Compulsory and Government Use Licenses in the COVID-19 Emergency in Nigeria | 2 |
| 51 | Ana Santos, 2020       | Comments on the Preliminary Framework for Equitable Allocation of COVID-19 Vaccine                                                                           | 2 |
| 52 | Anonymous, 2020        | ASHP principles for COVID-19 vaccine distribution, allocation, and mass immunization                                                                         | 2 |
| 53 | Ayers, 2021            | Disparities in H1N1 Vaccination Rates: a Systematic Review and Evidence Synthesis to Inform COVID-19 Vaccination Efforts                                     | 2 |
| 54 | Bell, 2018             | Preparedness for influenza vaccination during a pandemic in the World Health Organization Western Pacific Region                                             | 2 |
| 55 | Cerilles, n.d.         | Analysing the interplay between the right to health and pharmaceutical patent rights in the introduction of a COVID-19 vaccine into the Philippines          | 2 |
| 56 | Edwards, 2009          | Strategies for broad global access to pandemic influenza vaccines                                                                                            | 2 |
| 57 | Hadler, 2005           | Public health strategies for distribution of influenza vaccine during an influenza pandemic                                                                  | 2 |
| 58 | Lee, 2021              | Last-Mile Logistics of Covid Vaccination - The Role of Health Care Organizations                                                                             | 2 |
| 59 | Looi, 2021             | Jeremy Farrar: Make vaccine available to other countries as soon as our most vulnerable people have received it                                              | 2 |
| 60 | Martin, 2021           | Maintaining a Focus on Health Equity During the COVID-19 Vaccine Rollout                                                                                     | 2 |
| 61 | Medina-Walpole, 2021   | What It Will Take to Equitably Distribute a COVID-19 Vaccine                                                                                                 | 2 |
| 62 | Muula, 2007            | How relevant is Bellagio statement of principles on social justice and influenza to Africa?                                                                  | 2 |
| 63 | Subbaraman, 2020       | Who gets a COVID vaccine first? Access plans are taking shape                                                                                                | 2 |
| 64 | Todd, 2021             | Learning from past mistakes? The COVID-19 vaccine and the inverse equity hypothesis                                                                          | 2 |
| 65 | Varshney, 2021         | Vaccine diplomacy: Exploring the benefits of international collaboration                                                                                     | 2 |
| 66 | Adar, 2020             | Distribution equality as an optimal epidemic mitigation strategy                                                                                             | 3 |
| 67 | Alaran, 2021           | Uneven power dynamics must be levelled in COVID-19 vaccines access and distribution                                                                          | 3 |



|     |                                  |                                                                                                                                                                            |   |
|-----|----------------------------------|----------------------------------------------------------------------------------------------------------------------------------------------------------------------------|---|
| 68  | AlKhalidi, 2021                  | Rethinking and strengthening the Global Health Diplomacy through triangulated nexus between policy makers, scientists and the community in light of COVID-19 global crisis | 3 |
| 69  | Al-Oraibi, 2021                  | Migrant health is public health: a call for equitable access to COVID-19 vaccines                                                                                          | 3 |
| 70  | Anderson, 2020                   | Intensifying vaccine production                                                                                                                                            | 3 |
| 71  | Anonymous, 2021                  | COVID-19 Vaccine: Development, Testing, and Distribution                                                                                                                   | 3 |
| 72  | Bartovic, 2021                   | Ensuring equitable access to vaccines for refugees and migrants during the COVID-19 pandemic                                                                               | 3 |
| 73  | Bhatia, 2013                     | The H1N1 influenza pandemic: need for solutions to ethical problems                                                                                                        | 3 |
| 74  | Billington, 2020                 | Developing Vaccines for SARS-CoV-2 and Future Epidemics and Pandemics: Applying Lessons from Past Outbreaks                                                                | 3 |
| 75  | Boulton, 2021                    | Advancing Global Vaccination Equity                                                                                                                                        | 3 |
| 76  | Boum Ii, 2021                    | How to ensure a needs-driven and community-centred vaccination strategy for COVID-19 in Africa                                                                             | 3 |
| 77  | Briand, 2010                     | Future developments in global influenza surveillance                                                                                                                       | 3 |
| 78  | Bryan, 2021                      | WTO Waiver from Intellectual Property Protection for COVID-19 Vaccines and Treatments: A Critical Review                                                                   | 3 |
| 79  | Cheong, 2020                     | Unequal Access to Vaccines Will Exacerbate Other Inequalities                                                                                                              | 3 |
| 80  | Coleman, 2009                    | Allocating vaccines and antiviral medications during an influenza pandemic                                                                                                 | 3 |
| 81  | Commissioners, 2021              | Human rights and fair access to COVID-19 vaccines: the International AIDS Society-Lancet Commission on Health and Human Rights                                             | 3 |
| 82  | Dadari, 2021                     | Pro-equity immunization and health systems strengthening strategies in select Gavi-supported countries                                                                     | 3 |
| 83  | Elbe, 2010                       | Haggling over viruses: the downside risks of securitizing infectious disease                                                                                               | 3 |
| 84  | Eurosurveillance editorial, 2011 | Agreement on a pandemic influenza preparedness framework for the sharing of viruses and benefit sharing                                                                    | 3 |
| 85  | Fedson, 2006                     | Vaccine development for an imminent pandemic: why we should worry, what we must do                                                                                         | 3 |
| 86  | Gladas, 2021                     | Supporting efforts for a global COVID-19 vaccine                                                                                                                           | 3 |
| 87  | Goh, 2021                        | Covid-19 vaccination: the dangers of "values" imperialism                                                                                                                  | 3 |
| 88  | Gostin, 2006                     | Medical countermeasures for pandemic influenza: ethics and the law                                                                                                         | 3 |
| 89  | Griffin, 2020                    | Covid-19: Governments should demand transparency on vaccine deals, says MSF                                                                                                | 3 |
| 90  | Gronvall, 2006                   | Removing barriers to global pandemic influenza vaccination                                                                                                                 | 3 |
| 91  | Guerin, 2020                     | The consequence of COVID-19 on the global supply of medical products: Why Indian generics matter for the world?                                                            | 3 |
| 92  | Gurwitz, 2021                    | Ethical tradeoffs in SARS-CoV-2 vaccine development: Assuring fair availability for low-income countries                                                                   | 3 |
| 93  | Haaheim, 2007                    | Vaccines for an influenza pandemic: scientific and political challenges                                                                                                    | 3 |
| 94  | Halabi, 2020                     | No-Fault Compensation for Vaccine Injury - The Other Side of Equitable Access to Covid-19 Vaccines                                                                         | 3 |
| 95  | Hendriks, 2011                   | An international technology platform for influenza vaccines                                                                                                                | 3 |
| 96  | Henn, 2020                       | Allocation criteria for an initial shortage of a future SARS-CoV-2 vaccine and necessary measures for global immunity                                                      | 3 |
| 97  | Huneycutt, 2020                  | Finding equipoise: CEPI revises its equitable access policy                                                                                                                | 3 |
| 98  | Jecker, 2021                     | Out of Africa: A Solidarity-Based Approach to Vaccine Allocation                                                                                                           | 3 |
| 99  | Jecker, 2021                     | Vaccine ethics: an ethical framework for global distribution of COVID-19 vaccines                                                                                          | 3 |
| 100 | Kamradt-Scott, 2013              | The politics of medicine and the global governance of pandemic influenza                                                                                                   | 3 |
| 101 | Karim, 2020                      | COVID-19 vaccine affordability and accessibility                                                                                                                           | 3 |
| 102 | Katz, 2021                       | From Vaccine Nationalism to Vaccine Equity - Finding a Path Forward                                                                                                        | 3 |
| 103 | Kelley, 2020                     | An appeal for practical social justice in the COVID-19 global response in low-income and middle-income countries                                                           | 3 |

|     |                  |                                                                                                                                                      |   |
|-----|------------------|------------------------------------------------------------------------------------------------------------------------------------------------------|---|
| 104 | Kelley, 2021     | Process and operations strategies to enable global access to antibody therapies                                                                      | 3 |
| 105 | Khamisi, 2020    | If a coronavirus vaccine arrives, can the world make enough?                                                                                         | 3 |
| 106 | Kieny, 2009      | WHO supports fair access to influenza A (H1N1) vaccine                                                                                               | 3 |
| 107 | Koff, 2021       | A universal coronavirus vaccine                                                                                                                      | 3 |
| 108 | Kyd, 2010        | 3rd Global Vaccine Congress                                                                                                                          | 3 |
| 109 | Lee, 2011        | The Benefits To All Of Ensuring Equal And Timely Access To Influenza Vaccines In Poor Communities                                                    | 3 |
| 110 | Li, 2010         | Healthcare system cost evaluation of antiviral stockpiling for pandemic influenza preparedness                                                       | 3 |
| 111 | McLachlan, 2012  | A proposed non-consequentialist policy for the ethical distribution of scarce vaccination in the face of an influenza pandemic                       | 3 |
| 112 | McLachlan, 2015  | On the random distribution of scarce doses of vaccine in response to the threat of an influenza pandemic: a response to Wardrope                     | 3 |
| 113 | Monto, 2011      | Response to the 2009 pandemic: effect on influenza control in wealthy and poor countries                                                             | 3 |
| 114 | Mukherjee, 2020  | Global efforts on vaccines for COVID-19: Since, sooner or later, we all will catch the coronavirus                                                   | 3 |
| 115 | Nguyen, 2010     | The influenza challenge                                                                                                                              | 3 |
| 116 | Pagliusi, 2018   | Vaccines, inspiring innovation in health                                                                                                             | 3 |
| 117 | Palkonyay, 2016  | A decade of adaptation: Regulatory contributions of the World Health Organization to the Global Action Plan for Influenza Vaccines (2006-2016)       | 3 |
| 118 | Peters, 2021     | Ensuring vaccine supply meets global needs                                                                                                           | 3 |
| 119 | Rastegar, 2021   | An inventory-location optimization model for equitable influenza vaccine distribution in developing countries during the COVID-19 pandemic           | 3 |
| 120 | Roope, 2020      | How Should a Safe and Effective COVID-19 Vaccine be Allocated? Health Economists Need to be Ready to Take the Baton                                  | 3 |
| 121 | Ruscio, 2020     | Shaping meeting to explore the value of a coordinated work plan for epidemic and pandemic influenza vaccine preparedness                             | 3 |
| 122 | Sabri, 2020      | Solidarity in the time of covid-19 pandemic                                                                                                          | 3 |
| 123 | Saunders, 2018   | EQUALITY IN THE ALLOCATION OF SCARCE VACCINES                                                                                                        | 3 |
| 124 | Shretta, 2021    | Vaccinating the world against COVID-19: getting the delivery right is the greatest challenge                                                         | 3 |
| 125 | Smith, 2021      | Top five ethical lessons of COVID-19 that the world must learn                                                                                       | 3 |
| 126 | Snyder, 2020     | Designing Pull Funding For A COVID-19 Vaccine                                                                                                        | 3 |
| 127 | Stohr, 2006      | Influenza pandemic vaccines: How to ensure a low-cost, low-dose option                                                                               | 3 |
| 128 | Stoto, 2013      | Lessons about the state and local public health system response to the 2009 H1N1 pandemic: a workshop summary                                        | 3 |
| 129 | Straetmans, 2007 | Prioritization strategies for pandemic influenza vaccine in 27 countries of the European Union and the Global Health Security Action Group: a review | 3 |
| 130 | Tatar, 2021      | The Role of Good Governance in the Race for Global Vaccination during the COVID-19 Pandemic                                                          | 3 |
| 131 | Wardrope, 2012   | Scarce vaccine supplies in an influenza pandemic should not be distributed randomly: reply to McLachlan                                              | 3 |
| 132 | Wong, 2018       | Funding vaccines for emerging infectious diseases                                                                                                    | 3 |
| 133 | Wynia, 2006      | Ethics and public health emergencies: rationing vaccines                                                                                             | 3 |
| 134 | Yau, n.d.        | Mapping the inequality of the global distribution of seasonal influenza vaccine                                                                      | 3 |
| 135 | Zard, n.d.       | Leave no one behind: ensuring access to COVID-19 vaccines for refugee and displaced populations                                                      | 3 |
| 136 | Aranzazu, 2013   | The WHO influenza surveillance network. Modes of circulation of viruses strains, knowledge and technologies, 1947-2007                               | 4 |

|     |                                                               |                                                                                                                                                                    |   |
|-----|---------------------------------------------------------------|--------------------------------------------------------------------------------------------------------------------------------------------------------------------|---|
| 137 | Bingzhe, 2020                                                 | Expanding the pandemic influenza preparedness framework to the epidemic of COVID-19                                                                                | 4 |
| 138 | Leineweber, 2021                                              | The influence of the U.S. response to COVID-19 in Global Health                                                                                                    | 4 |
| 139 | Collin, 2009                                                  | [Influenza vaccine: globalization of public health stakes]                                                                                                         | 5 |
| 140 | Donatelli, 2003                                               | [WHO Influenza Global Agenda]                                                                                                                                      | 5 |
| 141 | Iacob, 2020                                                   | The Role of the Joint Procurement Agreement during the COVID-19 Pandemic: Assessing Its Usefulness and Discussing Its Potential to Support a European Health Union | 5 |
| 142 | Jorgensen, 2013                                               | Unequal access to vaccines in the WHO European Region during the A(H1N1) influenza pandemic in 2009                                                                | 5 |
| 143 | Lopalco, 2016                                                 | Pandemic vaccines: Are we prepared for the next pandemic?                                                                                                          | 5 |
| 144 | Mark, 2020                                                    | The Procurement of a COVID-19 Vaccine in Developing Countries: Lessons from the 2009-H1N1 Pandemic                                                                 | 5 |
| 145 | Mendes, 2021                                                  | Tackling inequitable distribution of the COVID-19 vaccine                                                                                                          | 5 |
| 146 | Saransh, 2021                                                 | Building Resilient Vaccine Distribution                                                                                                                            | 5 |
| 147 | Ana Santos, 2020                                              | The COVID-19 Vaccine Race: Intellectual Property, Collaboration(s), Nationalism and Misinformation                                                                 | 6 |
| 148 | Ana Santos, 2020                                              | The Reemergence of Vaccine Nationalism                                                                                                                             | 6 |
| 149 | Ana Santos, 2020                                              | The Intellectual Property of COVID-19                                                                                                                              | 6 |
| 150 | Armin von, 2020                                               | The Role of International Law in Vaccinating Against COVID-19: Appraising the COVAX Initiative                                                                     | 6 |
| 151 | Benjamin, 2020                                                | COVID-19 Vaccine Research, Development, Regulation and Access                                                                                                      | 6 |
| 152 | François, 2020                                                | Spatial Allocation of Scarce Vaccine and Antivirals for COVID-19                                                                                                   | 6 |
| 153 | Goldstein, 2021                                               | Failure to achieve global vaccine equity will have dire consequences                                                                                               | 6 |
| 154 | Jorge, 2021                                                   | US Support for a WTO Waiver of COVID-19 Intellectual Property – What Does it Mean?                                                                                 | 6 |
| 155 | Mohamed Mustafa, 2021                                         | The Cost of Procuring and Delivering COVID-19 Vaccines in Low- and Middle-Income Countries: A Model of Projected Resource Needs                                    | 6 |
| 156 | National Academies of Sciences Engineering and Medicine, 2020 | Framework for Equitable Allocation of COVID-19 Vaccine                                                                                                             | 6 |
| 157 | Shlomit, 2021                                                 | Intellectual Property Laws in the Digital Era: An International Distributive Justice Perspective                                                                   | 6 |
| 158 | Simon, 2021                                                   | The Covid-19 Vaccine Production Club: Will Value Chains Temper Nationalism?                                                                                        | 6 |
| 159 | Viviana Munoz, 2020                                           | The COVID-19 Pandemic: R&D and Intellectual Property Management for Access to Diagnostics, Medicines and Vaccines                                                  | 6 |

## Appendix 5: Data extraction form for factors influencing global equitable access to COVID-19 vaccines for Low-and Middle-Income Countries

1. Name of reviewer
2. First author and year of publication (Date) e.g. Li (2011)
3. Title
4. Inclusion criteria (all must be selected):
  - LMIC or globally focussed or normative guidance that affects LMIC
  - Published between 2005-2021
  - Discusses influenza/pandemic/COVID-19 vaccine(s)
  - Contains arguments/discussion on equity, access, allocation or prioritization of influenza/pandemic/COVID-19vaccine(s)
  - Published in English

Findings related to our Scoping Review research objective: What are the factors influencing global equitable access to a COVID-19 vaccine among countries?

5. Summarise: What does this article tell us about the knowledge related to allocation and pandemic vaccine(s)?
6. Key examples or illustrations from publication (including page numbers)
7. Summarise: What does this article tell us about the knowledge related to allocation and pandemic vaccine(s)?
8. Key examples or illustrations from publication (including page numbers)
9. Summarise: What does this article tell us about the knowledge related to allocation and pandemic vaccine(s)?
10. Key examples or illustrations from publication (including page numbers)
11. Summarise: What does this article tell us about the knowledge related to allocation and pandemic vaccine(s)?
12. Key examples or illustrations from publication (including page numbers)
13. Is there anything else that this study tells us about the knowledge in this topic area?
14. Challenges in implementing equitable access to vaccination
15. List any global initiatives/mechnasims/frameworks identified in our search that address equitable access to pandemic vaccine(s)?
16. Recommendations for strengthening equitable access to vaccination

## Preferred Reporting Items for Systematic reviews and Meta-Analyses extension for Scoping Reviews (PRISMA-ScR) Checklist

| SECTION                                               | ITEM | PRISMA-ScR CHECKLIST ITEM                                                                                                                                                                                                                                                                                  | REPORTED ON PAGE # |
|-------------------------------------------------------|------|------------------------------------------------------------------------------------------------------------------------------------------------------------------------------------------------------------------------------------------------------------------------------------------------------------|--------------------|
| <b>TITLE</b>                                          |      |                                                                                                                                                                                                                                                                                                            |                    |
| Title                                                 | 1    | Identify the report as a scoping review.                                                                                                                                                                                                                                                                   | 1                  |
| <b>ABSTRACT</b>                                       |      |                                                                                                                                                                                                                                                                                                            |                    |
| Structured summary                                    | 2    | Provide a structured summary that includes (as applicable): background, objectives, eligibility criteria, sources of evidence, charting methods, results, and conclusions that relate to the review questions and objectives.                                                                              | 2                  |
| <b>INTRODUCTION</b>                                   |      |                                                                                                                                                                                                                                                                                                            |                    |
| Rationale                                             | 3    | Describe the rationale for the review in the context of what is already known. Explain why the review questions/objectives lend themselves to a scoping review approach.                                                                                                                                   | 4, 5, 6            |
| Objectives                                            | 4    | Provide an explicit statement of the questions and objectives being addressed with reference to their key elements (e.g., population or participants, concepts, and context) or other relevant key elements used to conceptualize the review questions and/or objectives.                                  | 7                  |
| <b>METHODS</b>                                        |      |                                                                                                                                                                                                                                                                                                            |                    |
| Protocol and registration                             | 5    | Indicate whether a review protocol exists; state if and where it can be accessed (e.g., a Web address); and if available, provide registration information, including the registration number.                                                                                                             | 7                  |
| Eligibility criteria                                  | 6    | Specify characteristics of the sources of evidence used as eligibility criteria (e.g., years considered, language, and publication status), and provide a rationale.                                                                                                                                       | 8                  |
| Information sources*                                  | 7    | Describe all information sources in the search (e.g., databases with dates of coverage and contact with authors to identify additional sources), as well as the date the most recent search was executed.                                                                                                  | 7                  |
| Search                                                | 8    | Present the full electronic search strategy for at least 1 database, including any limits used, such that it could be repeated.                                                                                                                                                                            | 8                  |
| Selection of sources of evidence†                     | 9    | State the process for selecting sources of evidence (i.e., screening and eligibility) included in the scoping review.                                                                                                                                                                                      | 8                  |
| Data charting process‡                                | 10   | Describe the methods of charting data from the included sources of evidence (e.g., calibrated forms or forms that have been tested by the team before their use, and whether data charting was done independently or in duplicate) and any processes for obtaining and confirming data from investigators. | 8                  |
| Data items                                            | 11   | List and define all variables for which data were sought and any assumptions and simplifications made.                                                                                                                                                                                                     | 8                  |
| Critical appraisal of individual sources of evidence§ | 12   | If done, provide a rationale for conducting a critical appraisal of included sources of evidence; describe the methods used and how this information was used in any data synthesis (if appropriate).                                                                                                      | N/A                |

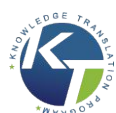

| SECTION                                       | ITEM | PRISMA-ScR CHECKLIST ITEM                                                                                                                                                                       | REPORTED ON PAGE # |
|-----------------------------------------------|------|-------------------------------------------------------------------------------------------------------------------------------------------------------------------------------------------------|--------------------|
| Synthesis of results                          | 13   | Describe the methods of handling and summarizing the data that were charted.                                                                                                                    | 8                  |
| <b>RESULTS</b>                                |      |                                                                                                                                                                                                 |                    |
| Selection of sources of evidence              | 14   | Give numbers of sources of evidence screened, assessed for eligibility, and included in the review, with reasons for exclusions at each stage, ideally using a flow diagram.                    | 9                  |
| Characteristics of sources of evidence        | 15   | For each source of evidence, present characteristics for which data were charted and provide the citations.                                                                                     | 9-20               |
| Critical appraisal within sources of evidence | 16   | If done, present data on critical appraisal of included sources of evidence (see item 12).                                                                                                      | 9-20               |
| Results of individual sources of evidence     | 17   | For each included source of evidence, present the relevant data that were charted that relate to the review questions and objectives.                                                           | 9-20               |
| Synthesis of results                          | 18   | Summarize and/or present the charting results as they relate to the review questions and objectives.                                                                                            | 9-20               |
| <b>DISCUSSION</b>                             |      |                                                                                                                                                                                                 |                    |
| Summary of evidence                           | 19   | Summarize the main results (including an overview of concepts, themes, and types of evidence available), link to the review questions and objectives, and consider the relevance to key groups. | 9 & 20-23          |
| Limitations                                   | 20   | Discuss the limitations of the scoping review process.                                                                                                                                          | 23                 |
| Conclusions                                   | 21   | Provide a general interpretation of the results with respect to the review questions and objectives, as well as potential implications and/or next steps.                                       | 24                 |
| <b>FUNDING</b>                                |      |                                                                                                                                                                                                 |                    |
| Funding                                       | 22   | Describe sources of funding for the included sources of evidence, as well as sources of funding for the scoping review. Describe the role of the funders of the scoping review.                 | 3                  |

JBI = Joanna Briggs Institute; PRISMA-ScR = Preferred Reporting Items for Systematic reviews and Meta-Analyses extension for Scoping Reviews.

\* Where *sources of evidence* (see second footnote) are compiled from, such as bibliographic databases, social media platforms, and Web sites.

† A more inclusive/heterogeneous term used to account for the different types of evidence or data sources (e.g., quantitative and/or qualitative research, expert opinion, and policy documents) that may be eligible in a scoping review as opposed to only studies. This is not to be confused with *information sources* (see first footnote).

‡ The frameworks by Arksey and O'Malley (6) and Levac and colleagues (7) and the JBI guidance (4, 5) refer to the process of data extraction in a scoping review as data charting.

§ The process of systematically examining research evidence to assess its validity, results, and relevance before using it to inform a decision. This term is used for items 12 and 19 instead of "risk of bias" (which is more applicable to systematic reviews of interventions) to include and acknowledge the various sources of evidence that may be used in a scoping review (e.g., quantitative and/or qualitative research, expert opinion, and policy document).

From: Tricco AC, Lillie E, Zarin W, O'Brien KK, Colquhoun H, Levac D, et al. PRISMA Extension for Scoping Reviews (PRISMA-ScR): Checklist and Explanation. *Ann Intern Med.* 2018;169:467–473. doi: 10.7326/M18-0850.

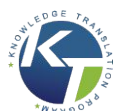

St. Michael's

Inspired Care.  
Inspiring Science.

For peer review only - <http://bmjopen.bmj.com/site/about/guidelines.xhtml>

# BMJ Open

## GLOBAL ACCESS TO COVID-19 VACCINES: A SCOPING REVIEW OF FACTORS THAT MAY INFLUENCE EQUITABLE ACCESS FOR LOW-AND MIDDLE-INCOME COUNTRIES

|                                 |                                                                                                                                                                                                                                                                                                                                                                                                                                            |
|---------------------------------|--------------------------------------------------------------------------------------------------------------------------------------------------------------------------------------------------------------------------------------------------------------------------------------------------------------------------------------------------------------------------------------------------------------------------------------------|
| Journal:                        | <i>BMJ Open</i>                                                                                                                                                                                                                                                                                                                                                                                                                            |
| Manuscript ID                   | bmjopen-2021-049505.R2                                                                                                                                                                                                                                                                                                                                                                                                                     |
| Article Type:                   | Original research                                                                                                                                                                                                                                                                                                                                                                                                                          |
| Date Submitted by the Author:   | 01-Sep-2021                                                                                                                                                                                                                                                                                                                                                                                                                                |
| Complete List of Authors:       | Peacocke, Elizabeth; Norwegian Institute of Public Health, Division for Health Services<br>Heupink, Lieke; Norwegian Institute of Public Health, Division for Health Services<br>Frønsdal, Katrine; Norwegian Institute of Public Health, Division for Health Services<br>Dahl, Elin Hoffmann; Haukeland Universitetssjukehus, Department of Medicine<br>Chola, Lumbwe; Norwegian Institute of Public Health, Division for Health Services |
| <b>Primary Subject Heading</b>: | Global health                                                                                                                                                                                                                                                                                                                                                                                                                              |
| Secondary Subject Heading:      | Health policy, Public health                                                                                                                                                                                                                                                                                                                                                                                                               |
| Keywords:                       | COVID-19, Public health < INFECTIOUS DISEASES, PUBLIC HEALTH, Health policy < HEALTH SERVICES ADMINISTRATION & MANAGEMENT                                                                                                                                                                                                                                                                                                                  |
|                                 |                                                                                                                                                                                                                                                                                                                                                                                                                                            |

SCHOLARONE™  
Manuscripts



I, the Submitting Author has the right to grant and does grant on behalf of all authors of the Work (as defined in the below author licence), an exclusive licence and/or a non-exclusive licence for contributions from authors who are: i) UK Crown employees; ii) where BMJ has agreed a CC-BY licence shall apply, and/or iii) in accordance with the terms applicable for US Federal Government officers or employees acting as part of their official duties; on a worldwide, perpetual, irrevocable, royalty-free basis to BMJ Publishing Group Ltd ("BMJ") its licensees and where the relevant Journal is co-owned by BMJ to the co-owners of the Journal, to publish the Work in this journal and any other BMJ products and to exploit all rights, as set out in our [licence](#).

The Submitting Author accepts and understands that any supply made under these terms is made by BMJ to the Submitting Author unless you are acting as an employee on behalf of your employer or a postgraduate student of an affiliated institution which is paying any applicable article publishing charge ("APC") for Open Access articles. Where the Submitting Author wishes to make the Work available on an Open Access basis (and intends to pay the relevant APC), the terms of reuse of such Open Access shall be governed by a Creative Commons licence – details of these licences and which [Creative Commons](#) licence will apply to this Work are set out in our licence referred to above.

Other than as permitted in any relevant BMJ Author's Self Archiving Policies, I confirm this Work has not been accepted for publication elsewhere, is not being considered for publication elsewhere and does not duplicate material already published. I confirm all authors consent to publication of this Work and authorise the granting of this licence.



1  
2  
3  
4 **GLOBAL ACCESS TO COVID-19 VACCINES: A SCOPING REVIEW OF FACTORS**  
5  
6 **THAT MAY INFLUENCE EQUITABLE ACCESS FOR LOW-AND MIDDLE-**  
7  
8 **INCOME COUNTRIES**  
9

10  
11 **Authors: Elizabeth Peacocke, Lieke Fleur Heupink, Katrine Frønsdal, Elin Hoffmann**  
12 **Dahl, Lumbwe Chola**  
13

14  
15 Corresponding author: Elizabeth Peacocke, DPH, Norwegian Institute of Public Health,  
16 Division for Health Services (a) [Elizabeth.Peacocke@fhi.no](mailto:Elizabeth.Peacocke@fhi.no), t. +47 941 60 559  
17

18  
19 Lieke Fleur Heupink, MSc. [LiekeFleur.Heupink@fhi.no](mailto:LiekeFleur.Heupink@fhi.no), Norwegian Institute of Public  
20 Health (a)  
21

22 Katrine Bjørnebek Frønsdal, PhD. [Katrine.Fronsdal@fhi.no](mailto:Katrine.Fronsdal@fhi.no), Norwegian Institute of Public  
23 Health (a)  
24

25 Elin Hoffmann Dahl, MD. [elin.hoffmann.dahl@helse-bergen.no](mailto:elin.hoffmann.dahl@helse-bergen.no), Haukeland University  
26 Hospital (b)  
27

28 Lumbwe Chola, PhD. [Lumbwe.Chola@fhi.no](mailto:Lumbwe.Chola@fhi.no), Norwegian Institute of Public Health (a)  
29

30 (a) Norwegian Institute of Public Health

31 Division for Health Services

32 Postbox 222 Skøyen, 0213 Oslo, NORWAY

33 Visiting address: Sandakerveien 24C, Entrance D11, 0473 Oslo, NORWAY  
34

35  
36 (b) Department of Medicine, Haukeland University Hospital, Bergen, Norway  
37

38  
39 *Key words: COVID-19 vaccine, equitable access, fair allocation, equitable distribution,*  
40 *scoping review*  
41

42 Word Count: (6321 incl. abstract)  
43  
44

45 List of attachments:

- 46 1. Figure 1: Timeline of relevant events and initiatives
- 47 2. Figure 2: PRISMA flow-chart for selection of articles
- 48 3. Appendix 1: Updated protocol
- 49 4. Appendix 2: Updated search strategies
- 50 5. Appendix 3: Data extraction template
- 51 6. Appendix 4: Excluded articles and reason for exclusion
- 52 7. Appendix 5: Articles underlying this brief
- 53
- 54
- 55
- 56
- 57
- 58
- 59
- 60

## Abstract

Objective: To identify the factors contributing to equitable access to coronavirus disease 2019 (COVID-19) vaccines for low-and middle-income countries (LMIC).

Methods: We conducted a scoping review following the guidelines for Preferred Reporting Items for Systematic Reviews and Meta-Analyses extension for Scoping Reviews and a five-stage framework for scoping studies. We performed systematic searches for published peer-reviewed literature in the five databases Medline, Embase, Web of Science, Global Index Medicus, and COVID-19 Evidence Epistemonikos (August 2020, updated May 2021).

Results: Systematic selection according to predefined criteria resulted in the final inclusion of 45 peer-reviewed articles, with no limitations on study design or publication type. We derived four key factors that potentially can influence equitable access to COVID-19 vaccines in LMICs: (1) collectively agreed global mechanisms or frameworks; (2) bilateral purchasing, contractual arrangements, and price of vaccines; (3) large-scale vaccine manufacturing that is supported by sharing know-how; and (4) countries' strength in implementing vaccination programs.

Conclusions: This scoping review highlights the ongoing challenges for the international community in ensuring equitable access to COVID-19 vaccines for LMICs. The literature suggests that vaccine manufacturing can influence the supply of vaccines, as can the role of patent holders who influence global governance through their role in the distribution of COVID-19 vaccines. Our findings indicate that including the principles of equitable access throughout vaccine research and development (R&D), procurement, scale-up, and distribution processes can ensure equitable access for LMICs. Advances made with mRNA vaccines may have additional benefits in relation to expanding the manufacturing of other vaccine. Finally, the exploration and scale-up of such capacities of LMICs are likely to prove to be a valuable investment, even after the pandemic.

### Strengths and limitations of this study

- To our knowledge, this is the first systematic scoping review of factors influencing equitable access to COVID-19 vaccines.
- Included literature was selected exclusively based on relevance to the topic (according to predefined criteria), provided that it was published in peer-reviewed journals with no further quality assessment.
- In light of the numerous daily published articles related to the COVID-19 pandemic, there might be additional relevant articles that should have been included. Hence, the list of identified factors might not be exhaustive nor completely cover the full? complexity of how various factors interact.

We used the framework proposed by Liu et al. (2020) as basis for our analysis, which we further refined through an iterative process during the analyses.

**Funding:** This work was partially supported by the Evaluation Department of the Norwegian Agency for Development Cooperation (Norad) in their role as a member of the OECD COVID-19 Global Evaluation Coalition (Grant number 1900737), and Norad Department of Education and Health (Grant number QZA-18/0102). The funders had no role in the study design, data collection and analysis, decision to publish, or preparation of the manuscript.

## BACKGROUND

The coronavirus disease 2019 (COVID-19) is a global crisis, and collective efforts are essential to curb its most devastating effects. The unprecedented demand for a vaccine has mobilized rapid vaccine development and large-scale investment in manufacturing capacity. The outlay of capital from investors for the scale-up and production of early candidate vaccines has contributed to rapid advances in vaccine science<sup>1</sup>. Despite these investments, the demand for safe, affordable, and effective COVID-19 vaccines is expected to outstrip supply for a considerable period of time<sup>2</sup>. To realize the maximum benefit, vaccines should be shared fairly between all nations of the world, otherwise there will continue to be differential morbidity and mortality with increased risk of virus mutations leading to even more death and disease from COVID-19, not to mention the indirect consequences to the global development and economy<sup>3</sup>.

In relation to the management of communicable disease outbreaks, the principle of shared benefits is a long-standing commitment of the World Health Organization (WHO)<sup>4</sup>. The Global Influenza Surveillance and Response System (GISRS) suggests benefit sharing as a potential solution to incentivize global collaborative infectious disease responses and measures, and in return members have real-time access to pandemic response products, like vaccines<sup>5 6</sup>. Low- and middle-income countries (LMIC) face unique challenges in accessing vaccines as they do not have the same resources to purchase vaccines and are less likely to have the know-how and technological capacity to be able to manufacture their own vaccines. They may also face uncertainty in their ability to obtain vaccines due to reduced purchasing power compared to high income countries (HIC) when negotiating with vaccine manufacturers<sup>7</sup>. Therefore, they are more reliant on multilaterally agreed frameworks or bilateral support to access new technologies<sup>6</sup>. The global community has previously in part

1  
2  
3 managed this with non-binding mechanisms designed to promote equitable access. The 2006  
4  
5 WHO Global pandemic influenza action plan, for instance, was designed to support increased  
6  
7 vaccine supply and global vaccine manufacturing capacity, by promoting technology transfer  
8  
9 to middle income countries (MICs)<sup>8</sup>. As established vaccine manufacturing nations, some  
10  
11 MICs' expertise can support the scale-up of vaccine production.  
12

13  
14 Ineffective institutional mechanisms for pandemic vaccine distribution were exposed during  
15  
16 the influenza A (H1N1) ("Swine flu") pandemic in 2009<sup>6</sup>, despite embedded principles of  
17  
18 reciprocity and equity for the prevention and control of influenza pandemics affirmed by  
19  
20 member states at 2003 World Health Assembly. Swine flu and the COVID-19 pandemic are  
21  
22 reminders that there is no institutional mechanism to effectively distribute global goods such  
23  
24 as COVID-19 vaccines<sup>4</sup>. The Pandemic Influenza Preparedness (PIP) Framework was  
25  
26 developed following the H5N1 outbreak in Indonesia in 2005, triggering increased interest in  
27  
28 the GISRS, which in turn lead to the WHO intergovernmental process and further scrutiny of  
29  
30 its influence on the development of influenza vaccines, and recognition of failures to ensure  
31  
32 fairness, transparency and equity in access to vaccines for LMICs<sup>6 9 10</sup>.  
33  
34  
35  
36  
37  
38  
39

40 Specifically, for COVID-19, the WHO led the Access to COVID-19 Tools Accelerator  
41  
42 (ACT-A) global collaboration designed to fast-track development, production, and equitable  
43  
44 access to COVID-19 tests, treatments and vaccines<sup>11</sup>. COVAX, the vaccines pillar of the  
45  
46 ACT-A, is an initiative whose role is proving to be integral in the equitable distribution and  
47  
48 access to COVID-19 vaccines, by providing an alternative for LMICs that have been failed by  
49  
50 historical bilateral vaccine donation systems<sup>1 12</sup>. COVAX is co-led by the Coalition for  
51  
52 Epidemic Preparedness Innovations (CEPI), a vaccine funding initiative, Gavi, the vaccine  
53  
54 alliance, and WHO. Member countries of COVAX include those that have self-financing  
55  
56 investments, but also others that are being supported through aid. COVAX aims to coordinate  
57  
58  
59  
60

1  
2  
3 the vaccination of high risk and vulnerable populations, including frontline healthcare  
4 workers across the world, through distributing two billion vaccine doses by the end of 2021.  
5  
6 These vaccines will be shared between the member countries, of which 78 are HICs, and 92  
7 are LMICs<sup>13</sup>. Figure 1 lists events and a timeline of initiatives introduced before and  
8 following relevant pandemics, as identified in our scoping review.  
9  
10  
11  
12  
13  
14  
15  
16

### 17 **Figure 1: Timeline of events and relevant initiatives**

18 *See attached as a .jpg file*  
19  
20  
21  
22  
23

24 The idea that access and distribution of COVID-19 vaccines should be equitable across  
25 countries is widely supported, but what *equity* means in this context is often not specified.  
26 From the perspective of LMICs, equitable access to a vaccine is fundamentally linked to a fair  
27 and transparent global distribution framework<sup>14</sup>. Hence, for the purpose of this review,  
28 equitable access is interpreted as all countries, and their populations, having equal access to  
29 COVID-19 vaccines irrespective of the income status of the country. Further, we considered a  
30 COVID-19 vaccine as an essential medicine\*. We have used the WHO definition of health  
31 equity<sup>15 16</sup>. In its first phase, COVAX plans to allocate vaccines in proportion to countries'  
32 total population so that all countries receive doses to cover 20% of their population<sup>17 18</sup>.  
33 Alternative proposals exist, including The Fair Priority Model proposed by a group of  
34 ethicists. This model goes beyond proportional allocation by proceeding with allocation of  
35 vaccines in three phases, which would in the first instance prioritize the prevention of more  
36 urgent harms<sup>19 20</sup>. The ethical rationale behind this model argues that proportional allocation,  
37 as suggested by WHO and COVAX, is not the fairest solution, as it implies that some  
38 countries with relatively lower risk of death and disease from COVID-19 would receive  
39 access to vaccines at the expense of other countries that are facing more exposure<sup>20</sup>.  
40  
41  
42  
43  
44  
45  
46  
47  
48  
49  
50  
51  
52  
53  
54  
55  
56  
57  
58  
59  
60

1  
2  
3  
4  
5 The objective of this scoping review was to identify and summarize those factors that  
6  
7 contribute to the equitable access of COVID-19 vaccines for LMICs. To our knowledge, the  
8  
9 literature related to the equitable access of COVID-19 vaccines relevant for LMICs has not  
10  
11 yet been systematically investigated. The review is considered highly relevant as it can  
12  
13 provide lessons from previous experiences and perspectives on equitable access to pandemic  
14  
15 vaccine, by identifying key factors that could guide implementation of future initiatives to  
16  
17 ensure equitable access.  
18  
19  
20  
21

22  
23 *\*Essential medicines are those that satisfy the priority health care needs of the population*  
24 *^Health equity or “equity in health” implies that ideally everyone should have a fair*  
25 *opportunity to attain their full health potential and that no one should be disadvantaged from*  
26 *achieving this potential*  
27  
28

## 29 **METHODS**

30 We performed systematic scoping searches following the Preferred Reporting Items for  
31  
32 Systematic Reviews and Meta-Analyses extension for Scoping Reviews (PRISMA-ScR) as  
33  
34 indicated in Figure 2, and were guided by the Arksey and O'Malley's five-stage framework for  
35  
36 scoping studies through the steps of the review<sup>21 22</sup>. The study protocol was peer reviewed by  
37  
38 methodological and subject experts at the Norwegian Institute of Public Health (NIPH)  
39  
40 (Appendix 1).  
41  
42  
43  
44  
45

46 Based on predefined inclusion criteria (Table 1), we systematically searched in the following  
47  
48 five databases: Medline (PubMed and Ovid), Embase, Web of Science, Global Index Medicus  
49  
50 (WHO), and COVID-19 Evidence Epistemonikos. Search strategy was based on following  
51  
52 key words and terms and combinations of these, i.e. coronavirus, COVID-19, SARS-CoV,  
53  
54 equity, LMIC, pandemic, and (influenza) vaccine (Appendix 2). An information specialist, in  
55  
56 collaboration with co-authors, developed the search strategies for the different databases. The  
57  
58  
59  
60

search was performed on 28 August 2020 and updated on 12 May 2021. Only published literature in peer-reviewed journals was eligible for inclusion, with no limitations on study design nor publication type. The articles for extraction were exclusively chosen based on relevance to the topic of identifying and describing potential factors related to equitable access to pandemic or COVID-19 vaccines, with no further quality assessments.

**Table 1: Inclusion criteria**

| Criterion       | Inclusion                                                                              |
|-----------------|----------------------------------------------------------------------------------------|
| Time            | 01 January 2002 – 12 May 2021                                                          |
| Language        | English                                                                                |
| Type of article | Published in peer reviewed journals                                                    |
| Article focus   | Pandemic vaccines including influenza or COVID-19 vaccine                              |
| Outcomes        | Factors influencing equitable access to a pandemic vaccine including COVID-19 vaccines |

Publications were screened based on title and abstract according to the inclusion criteria (Table 1). Two reviewers independently selected articles to be considered for full text screening. Selected articles were then read in full and considered for inclusion or exclusion by two different reviewers. Final decisions on inclusion of relevant articles were determined through consultation between three of the reviewers. Disagreements were resolved through discussions to reach consensus. See Appendix 3 for the list of the excluded articles and reasons for exclusion.

Data extraction was performed by one reviewer and verified by a second. We used a data extraction form designed specifically for this scoping review. We extracted information on the setting; discussion on equity, access, allocation or prioritization of pandemic vaccines; other equity aspects; challenges in implementing equitable access to vaccination between countries; and recommendations for strengthening equitable access to vaccination (Appendix 4). The analytic process followed the principles of thematic synthesis. The article by Liu et al. was identified as an index paper as it suggested a framework that closely reflected the focus of our



1  
2  
3 scoping review<sup>23</sup>. The themes identified in this article were used as basis to extract and  
4  
5 categorize our findings, and was further refined during the analysis through an iterative  
6  
7 process as we identified potential factors influencing equitable access to COVID-19 vaccines  
8  
9 in LMICs.  
10  
11  
12  
13

## 14 **RESULTS**

15 Excluding duplicates, our search identified 3,025 unique citations (Figure 2). Screenings first  
16  
17 based on title and abstract, then on full text resulted in the final inclusion of 45 articles  
18  
19 (described in Appendix 5).  
20  
21  
22  
23  
24

### 25 **Figure 2: PRISMA flow-chart for selection of articles**

26  
27 *See attached .jpg file*  
28  
29  
30  
31

32 We categorized the identified themes from the included citations into four factors influencing  
33  
34 access to COVID-19 vaccines in LMICs: (1) collectively agreed global mechanisms or  
35  
36 frameworks can contribute to equitable access to COVID-19 vaccines; (2) bilateral  
37  
38 purchasing, contractual arrangements, and price can influence fair allocation of vaccines; (3)  
39  
40 large-scale vaccine manufacturing that is supported by sharing know-how can facilitate  
41  
42 increased supply and allocation of COVID-19 vaccines; and (4) countries' strength in  
43  
44 implementing vaccination programs may influence their populations access to vaccines (Table  
45  
46  
47  
48 2).  
49  
50  
51  
52  
53  
54  
55  
56  
57  
58  
59  
60

**Table 2: Summary of identified factors contributing to equitable access to COVID-19 vaccines**

| Factors                                                                                                                                     | Scoping review findings                                                                                                                                                         | Articles contributing to the finding       |
|---------------------------------------------------------------------------------------------------------------------------------------------|---------------------------------------------------------------------------------------------------------------------------------------------------------------------------------|--------------------------------------------|
| Collectively agreed global mechanisms or frameworks can contribute to equitable access to COVID-19 vaccines                                 | Establishing a collective and coordinated COVID-19 donation process will facilitate equitable allocation of pandemic vaccines                                                   | 1 5 13 24-41                               |
|                                                                                                                                             | Global solidarity is facilitated by multilateral organizations and agreed frameworks                                                                                            | 1 5 25 28 30 33 34 36 42                   |
|                                                                                                                                             | Previous collective action has been inadequate with examples of deficient vaccine donation and pledging systems related to pandemic vaccines                                    | 1 7 26 30-35 37 42-47                      |
|                                                                                                                                             | Vaccine patent holders play a pivotal role in global the prices and distribution of vaccines                                                                                    | 6 30 46 48-51                              |
| Bilateral purchasing, contractual arrangements, and price influence the fair allocation of vaccines                                         | Financing mechanisms that facilitate collective purchasing or pooled procurement favor fairer allocation                                                                        | 1 5 6 25 28 29 33 34 40 43 47 48 52-54     |
|                                                                                                                                             | Nationalistic approaches, where bilateral rather than collective purchasing is pursued, contribute to hoarding or supply inefficiencies, limiting the global supply of vaccines | 1 7 23-27 29 31-34 36-38 41 42 44 50 54-58 |
|                                                                                                                                             | Pandemic vaccines will largely be purchased by, and for use in, high income countries (HICs)                                                                                    | 25 27-30 32-38 40-42 44-47 54-57 59        |
|                                                                                                                                             | LMICs cannot procure or negotiate the purchase of pandemic vaccines at the same level as HICs, and can therefore be disadvantaged by bilateral deals                            | 1 6 25 29 32 33 37 56 59                   |
|                                                                                                                                             | The price and affordability of vaccines influences equitable access                                                                                                             | 7 27-29 33 47 48 53                        |
| Large-scale vaccine manufacturing that is supported by sharing know-how can facilitate increased supply and allocation of COVID-19 vaccines | Substantial investments are required to finance and support global vaccine manufacturing                                                                                        | 5 7 29 32 33 37-39 41 46 49 53             |
|                                                                                                                                             | There is disparity between countries that have the capacity to produce vaccines and those that use vaccines                                                                     | 5 7 24 42 51 56                            |
|                                                                                                                                             | Technology transfer of vaccine manufacturing (especially to MICs) supports increased supply favoring fairer allocation                                                          | 1 6 27-30 35-37 46 48-50 54 56             |
|                                                                                                                                             | Intellectual property rights influence domestic manufacturing                                                                                                                   | 6 29 33 36 37 46 48 51                     |
|                                                                                                                                             | Capacity building for technology transfer can support vaccine manufacturing and technology transfer in LMICs                                                                    | 1 6 27 29 32 33 48 53 56                   |
|                                                                                                                                             | Place of vaccine manufacturing influences exporting of vaccines, such as through a nation’s sovereignty over national borders                                                   | 1 6 27 29 42 48 51-53 56                   |

| Factors                                                                                                      | Scoping review findings                                                                                                  | Articles contributing to the finding |
|--------------------------------------------------------------------------------------------------------------|--------------------------------------------------------------------------------------------------------------------------|--------------------------------------|
| Countries' strength in implementing vaccination programs may influence their populations' access to vaccines | A country's ability to vaccinate should be a consideration in equitable distribution                                     | 1 13 24 27 41 60 61                  |
|                                                                                                              | Management of logistical and administrative components facilitate distribution of vaccines                               | 5 13 27 28 37 47                     |
|                                                                                                              | A countries' regulatory approval and market authorization processes for vaccines influences the distribution of vaccines | 30 33 37 51 58 61                    |

For peer review only

1  
2  
3  
4  
5  
6  
7  
8  
9  
10  
11  
12  
13  
14  
15  
16  
17  
18  
19  
20  
21  
22  
23  
24  
25  
26  
27  
28  
29  
30  
31  
32  
33  
34  
35  
36  
37  
38  
39  
40  
41  
42  
43  
44  
45  
46

- *Collectively agreed global mechanisms or frameworks can contribute to equitable access to COVID-19 vaccines*

Most articles indicated collective action is being key to contribute to equitable access<sup>1 5 6 13 24-35 37-40 42-52</sup>. Global collective agreements should be driven by multilateral agencies that have the global mandate to convene interest groups, advocate for collective response measures, as well as the investment, procurement and distribution of pandemic vaccines<sup>58</sup>. These measures may be addressed by prompt agreement on equitable access<sup>5 30 39 41</sup>.

The reviewed literature suggests that historic vaccine donation and pandemic influenza pledging systems, have been insufficient, mainly due to the lack of legal obligation to act or the lack of penalty for parties who breach conditions<sup>1 26 27 30-35 37 42-45 47</sup>. To mitigate this, it is proposed that collective approaches need to be binding<sup>35</sup>. Actually such a legal framework that has been ratified by 171 countries already exists, the International Covenant on Economic, Social, and Cultural Rights (1966), however, it has not achieved its intended purpose for countries to take steps to ensure the right to health and the benefits of scientific research, without discrimination<sup>34 44</sup>. In spite of these so-called failures of collective action, there is wide acceptance of the moral argument that HICs should support LMICs in equitable access to pandemic vaccines, recognizing that any collective purchasing will have inherent inequalities related to existing power dynamics between the Global North and the Global South, and recognizing that the status quo historically favored HICs over LMICs<sup>25 35</sup>. Specifically, for vaccine allocation, there are historical examples of manufacturers not reliably committing to reserving production of pandemic vaccines to LMICs<sup>6 26 42</sup>.

Bilateral solutions threaten collective action by enabling some countries to queue jump<sup>1 29</sup>.

These approaches will always be pursued during global crises, as has been demonstrated

1  
2  
3 during COVID-19, and as such cannot be avoided<sup>32</sup>. McAdams et al. therefore suggest that it  
4 comes down to how these bilateral arrangements are structured, using two deals from  
5 different US government agencies, the Biomedical Advanced Research and Development  
6 Authority (BARDA) who has a deal with AstraZeneca, and the US Department of Health and  
7 Human Services (HHS) who secured 100 million doses of Pfizer, as examples<sup>32</sup>. The authors  
8 suggest that the deal negotiated by BARDA benefits US, AstraZeneca and the rest of the  
9 world by supporting the gaining, and sharing, of knowledge through its funding of advanced  
10 clinical studies, vaccine manufacturing technology transfer, process development and scaled-  
11 up manufacturing, which in turn supports more vaccines and increased availability. In  
12 contrast, the Pfizer deal only supports US and Pfizer interests. The article concludes that  
13 BARDA's deal will result in more vaccines for LMICs, regardless of whether HICs vaccinate  
14 their own populations first<sup>32</sup>.

15  
16  
17  
18  
19  
20  
21  
22  
23  
24  
25  
26  
27  
28  
29  
30  
31  
32  
33 COVAX is the supported mechanism and widely promoted in the literature included in this  
34 review, yet the facility has faced criticisms related to transparency, limited knowledge  
35 sharing, and need for more political and financial commitment<sup>31 55</sup>. It has also faced  
36 challenges related to managing the role of patent holders who have played a determining role  
37 in distribution of their medical countermeasures. This affects global governance, with patent  
38 holders maintaining influence over the distribution of patented technologies during a  
39 pandemic, a power that rests with few pharmaceutical companies controlling the global  
40 supply and distribution of vaccines<sup>48 50</sup>.

41  
42  
43  
44  
45  
46  
47  
48  
49  
50  
51  
52  
53  
54 The global prices of respective vaccines are not uniform across settings, with the price of a  
55 COVID-19 vaccine influenced by its patent<sup>29 47 50</sup>. To counteract the inequality in global  
56 distribution, in October 2020, a proposal was made by India and South Africa to the World  
57  
58  
59  
60

1  
2  
3 Trade Organization (WTO) requesting a temporary waiver of certain provisions of the Trade-  
4 Related Aspects of Intellectual Property Rights (TRIPS) Agreement, based on the need to  
5 prevent, contain, and treat COVID-19<sup>46 50</sup>. There is no consensus in the literature included in  
6 this review on the benefits of the waiving of intellectual property rights (IPR), with those  
7 against the waiver, arguing that it is not patent protection that is the barrier to introducing  
8 generic vaccines<sup>44 46 49</sup>, but rather the lack of knowledge in the public domain and shortages of  
9 vaccine supplies<sup>1</sup>. The implications on national manufacturing, including a countries' ability  
10 to enact compulsory licensure under TRIPS is discussed later in this article.  
11  
12  
13  
14  
15  
16  
17  
18  
19  
20  
21  
22

- 23 • *Bilateral purchasing, contractual arrangements, and price can influence the fair*  
24 *allocation of vaccines*  
25  
26  
27

28 HICs have a track-record of dominating the global supply of pandemic vaccines, through  
29 greater advanced purchasing power and their ability (including proximity) to vaccine  
30 manufacturing. In 2021, 51% of the initial supply of COVID-19 vaccines had been purchased  
31 for 13% of the world's population, mostly residing in HICs<sup>28 30 42</sup>, indicating that fair vaccine  
32 allocation is hindered by the inability of LMICs to procure or negotiate access to pandemic  
33 vaccines at the same level as HICs<sup>6 59</sup>.  
34  
35  
36  
37  
38  
39  
40  
41  
42  
43  
44

45 Vaccine development under the COVID-19 pandemic has highlighted the conflicting roles  
46 between private capital and access to essential health care technologies. Final stage R&D of  
47 vaccines (and other medical technologies) are largely led by multi-national pharmaceutical  
48 companies who are incentivized by IPR and return on investment, thus perpetuating structural  
49 market-based inequalities of supply and demand. This affects the total quantity of vaccines  
50 produced, which, in the case of influenza vaccines, has affected LMICs as it has been  
51 perceived that there is "lower demand" in these markets<sup>35 52</sup>. During this recent pandemic,  
52  
53  
54  
55  
56  
57  
58  
59  
60

1  
2  
3 substantial public funding, that has historically been targeted more towards early- stage  
4  
5 development, has also been invested in the late-stage development of multiple COVID-19  
6  
7 vaccines contributing to global market distortions<sup>32 37 38 54</sup>.

10  
11  
12 Pooled procurement is mentioned in the literature of this review as a means to support equity,  
13  
14 with Advanced Purchase Agreements (APA) and Advanced Market Commitments (AMC)  
15  
16 being the most common mechanisms identified in our review to facilitate access for LMICs<sup>5 6</sup>  
17  
18 <sup>25 28 29 33 34 40 47 48 52-54</sup>. APAs are contracts with a specific product developer, whereas an AMC  
19  
20 is a global market commitment<sup>40</sup>. The AMC was first introduced in 1999 for the development  
21  
22 of a late-stage pneumococcal vaccine, with the intention to shorten the time to introduction of  
23  
24 a vaccine to LMICs<sup>40</sup>. Under COVID-19, APAs have been widely used to secure priority  
25  
26 access to a scarce resource (when one party has committed to buy a specific number or  
27  
28 percentage of doses prior to development), the influential factor for equitable access being  
29  
30 whether they promote the interests of one country or several, and if they include LMICs<sup>5 6 30 34</sup>  
31  
32 <sup>43 52</sup>.

33  
34  
35  
36  
37  
38  
39  
40 Bilateral deals contribute to supply inefficiencies and threaten collective approaches to the  
41  
42 procurement of vaccines, e.g., National APAs initiated by countries that are also members of  
43  
44 COVAX (not exclusively, but mainly HICs)<sup>32 37 38 54 55</sup>. At the beginning of the COVID-19  
45  
46 pandemic, HICs went ahead to purchase large quantities of COVID vaccines<sup>31</sup>. The necessity  
47  
48 for transparency of contractual clauses, especially relating to pricing, licensing and purchase  
49  
50 commitments, was identified in the review as potentially negative as/since? global  
51  
52 coordination efforts will suffer unless vaccine manufacturers can be trusted to responsibly  
53  
54 decide which countries' vaccine orders should be prioritized<sup>34 37</sup>.

1  
2  
3 Bilateralism is not limited to relationships between countries and vaccine manufacturers.

4  
5 During the COVID-19 pandemic, bilateral deals have also been struck between countries to  
6  
7 directly distribute vaccines. For example, both the Russian and Chinese government owned  
8  
9 and operated vaccine manufacturers have bilateral arrangements with other countries, such as  
10  
11 India, Vietnam, Mexico, Brazil, and Ethiopia to guarantee the supply of vaccines<sup>28 29 54 56</sup>.

- 12  
13  
14  
15  
16  
17 • *Large-scale vaccine manufacturing that is supported by sharing know-how can facilitate*  
18  
19 *increased supply and allocation of COVID-19 vaccines*

20  
21 Several articles included in this review suggest that substantial additional financial and  
22  
23 capacity investment is required to further global vaccine manufacturing<sup>5 7 29 32 33 37 39 41 46 49 53</sup>

24  
25  
26 <sup>62</sup>. Vaccine development is multifaceted, and manufacturing during a pandemic faces  
27  
28 unprecedented challenges in scale and complexity<sup>58</sup>. A limited number of HICs, and some  
29  
30 MICs, have vaccine manufacturing capacity, resulting in a disparity between countries that  
31  
32 have the capacity to produce vaccines and those that need access to those vaccines<sup>5 7 24 42 51 56</sup>.

33  
34  
35 Nhamo et al. reported that development activity for COVID-19 vaccines is almost non-  
36  
37 existent in LMICs<sup>33</sup>. The majority of development activity is in Asia, with 12 (52%) COVID-  
38  
39 19 vaccine development programs, followed by Europe (17%) and North America with four  
40  
41 programs each (17%)<sup>33</sup>. A few MICs (Brazil, India and Peru) have capitalized on their clinical  
42  
43 testing or manufacturing capacity efforts by leveraging these for purchase agreements with  
44  
45 vaccine manufacturers<sup>29</sup>. Limited capacity affects the global availability of pandemic vaccines  
46  
47 for two reasons. Firstly, the world is unable to manufacture the quantity of vaccines  
48  
49 demanded, and secondly, a manufacturing country has the sovereign authority over goods  
50  
51 produced within its borders with most countries in the world having legislation in place that  
52  
53 require companies to manufacture and prioritize domestic consumption<sup>33 51 52</sup>. In situations  
54  
55 where it is enforced, government intervention may hinder global distribution.  
56  
57  
58  
59  
60



1  
2  
3  
4  
5 For technology transfers to work, there needs to be a patent holder that is willing to share the  
6 intellectual property and a manufacturing facility that can receive it. The findings from this  
7 review suggest that MICs with vaccine manufacturing capability can play an important role to  
8 support and fill the forecasted gap in international vaccine manufacturing capacity, but this  
9 requires technology transfer and capacity building to manufacture vaccines that meet the same  
10 efficacy and quality standards as the original vaccine<sup>1 6 27-30 35-37 46 48-51 54 56</sup>. Vaccine  
11 manufacturing know-how can include vaccine developers by sharing the intellectual property  
12 of vaccine manufacturing processes or relaxing patent rights<sup>6 29 33 36 37 46 48</sup>. One article  
13 included in this scoping review suggests that for viral vector vaccines (e.g., AstraZeneca and  
14 Johnson & Johnson), MICs with less advanced manufacturing capacity can contribute with  
15 the fill-and-finish stage of the process, rather than producing the active solution of the  
16 vaccine<sup>49</sup>.

17  
18  
19  
20  
21  
22  
23  
24  
25  
26  
27  
28  
29  
30  
31  
32  
33  
34  
35 Under the WTO TRIPS Agreement, countries have a right for the compulsory licensure of  
36 products in certain circumstances. In practice, this means that a country can produce a  
37 patented product or process without the consent of the patent owner, as demonstrated by  
38 Canada, Chile and Ecuador in their pandemic response<sup>29</sup>. The discussion related to the TRIPS  
39 waiver is especially important to LMICs, who recall recent historical experiences from South  
40 Africa where patents obstructed access to life-saving medicines for the treatment of  
41 HIV/AIDS<sup>44</sup>. Advocates for the COVID-19 products TRIPS waiver argue that significant  
42 public monies have contributed to the development of these patents thus waiving IPR will  
43 support vaccine development and manufacturing, but that some countries are already  
44 undermining existing TRIPS flexibilities through restrictive free trade agreements<sup>36 44 54 55</sup>.  
45  
46  
47  
48  
49  
50  
51  
52  
53  
54  
55  
56  
57  
58 Proponents against governments' enacting patent waivers claim that they contribute to  
59  
60

1  
2  
3 inefficiencies by diverting raw materials and supplies away from effective manufacturers<sup>49</sup>.  
4  
5 Compulsory licenses are not considered by these proponents as being a practical tool to  
6  
7 rapidly expand access to vaccines, instead they support voluntary licensure, for instance,  
8  
9 AstraZeneca's arrangements with Indian and Brazilian manufacturers<sup>1 46 49</sup>. A related issue  
10  
11 impacting on manufacturing capacity is the use of limited manufacturing capacity on all  
12  
13 vaccine candidates. So et al. caution that a weakness of prematurely exhausting capacity for  
14  
15 vaccines that show early safety and efficacy promise, is that manufacturing capacity will then  
16  
17 be locked into first generation vaccines, and may be a bottleneck for manufacturing capacity  
18  
19 for second generation more effective vaccines<sup>54</sup>.  
20  
21  
22  
23  
24  
25

26 Finally, two noteworthy initiatives are identified in the literature reviewed: 1) the global  
27  
28 pandemic influenza action plan to increase vaccine supply (GAP) (2006-2016), a strategy to  
29  
30 reduce global shortages of influenza and pandemic vaccines that supports technology  
31  
32 transfer<sup>30 44</sup>; and, 2) the recent COVID-19 Technology Access Pool (C-TAP) (2020) proposed  
33  
34 by Costa Rica and adopted by WHO (endorsed by 35 mainly MICs and five HICs). C-TAP  
35  
36 calls for the voluntary sharing of knowledge, intellectual property, and data as well as a  
37  
38 guarantee of free access and use by WHO member countries for drugs and vaccines that are  
39  
40 developed<sup>29 35 37</sup>. Given the world's limited manufacturing capacity, the use of technology  
41  
42 transfer and pooling of vaccines could help to alleviate a massive shortage of vaccines given  
43  
44 the scale of the need<sup>39</sup>.  
45  
46  
47  
48  
49  
50

- 51 • *Countries' strength in implementing vaccination programs may influence their*  
52  
53 *populations access to vaccines*  
54  
55

56 The findings from this scoping review further suggest that the ability of a country to  
57  
58 implement a mass vaccination program is an important factor that may influence equitable  
59  
60

1  
2  
3 access<sup>23</sup>. Vaccination programs are resource intensive, therefore, to maximize the benefit of  
4 COVID-19 vaccines and reduce waste due to improper implementation, it has been suggested  
5 that allocation frameworks should consider a country's ability to vaccinate<sup>1 13 23 24 27 41 60 61</sup>.  
6  
7 Most LMICs have well-structured immunization programs, for polio, measles and smallpox  
8 etc., facilitated by organizations such as UNICEF and Gavi, which could support a large-scale  
9 pandemic vaccination program. It has been reported that Gavi, for example, has sought to  
10 expand its Cold Chain Equipment Optimization Program<sup>27</sup>. More than half of the countries in  
11 the world lack robust programs to tackle seasonal influenza, despite most associated death and  
12 severe disease from influenza occurring in countries of the Global South<sup>61</sup>. The down  
13 prioritization of seasonal influenza vaccination for older populations in LMICs compared to  
14 HICs, is a vulnerability for the roll out of COVID-19 vaccines<sup>30 33 60 61</sup>. Ruscio et al. noted that  
15 an attempt to fill this gap has been made by the recently published WHO Global Influenza  
16 Strategy 2019–2030<sup>61</sup>.  
17  
18  
19  
20  
21  
22  
23  
24  
25  
26  
27  
28  
29  
30  
31  
32  
33  
34

35 Vaccine roll-out requires stable cold chain and supply processes for the necessary logistical  
36 and administrative components to facilitate distribution of vaccines, including financing the  
37 in-country delivery of vaccines, from cold chain to administration<sup>13 27 28 37 47 62</sup>. Different  
38 vaccines have different temperatures for deployment, which influences supply of vaccine to  
39 communities<sup>13 27 47 49 62</sup>. This is a particular challenge in sub-Saharan Africa, where only 28%  
40 of health care facilities have a reliable energy supply<sup>13</sup>. In this context, vaccines that require  
41 only one dose or those that can be stored at room temperature, are more likely to facilitate  
42 equitable access<sup>47</sup>. There is also an opportunity to explore the use of new containers and  
43 packaging that support distribution. For example, pre-formed plastic vials are being  
44 successfully used for oral rotavirus and cholera vaccines<sup>60</sup>. Data solutions should also be  
45  
46  
47  
48  
49  
50  
51  
52  
53  
54  
55  
56  
57  
58  
59  
60

1  
2  
3 considered, as these could support alternative vaccine delivery systems for target groups, as  
4  
5 well as being an important tool to capture the populations vaccination history<sup>28</sup>.  
6  
7

8  
9  
10 Smooth regulatory and market authorization processes for vaccines can facilitate the  
11  
12 distribution of vaccines<sup>30 33 37 51 61</sup>. One article from this scoping review highlighted the  
13  
14 importance of clinical vaccine studies in LMICs and HICs alike, to support the fast-tracking  
15  
16 of market authorization, as local clinical trial data is a recognized grounds for delay to  
17  
18 introduce some vaccines into countries' immunization programs<sup>33</sup>. Delays for products  
19  
20 preventing or treating infectious diseases are cited at being between 4 to 7 years from first  
21  
22 approval in a high-income country and final approval in a country in sub-Saharan Africa<sup>37</sup>.  
23  
24  
25  
26  
27

## 28 **DISCUSSION**

29  
30 This study identified four key factors that carry the potential to promote fairer global access to  
31  
32 COVID-19 vaccines. Our findings suggest that an international approach is necessary to  
33  
34 minimize the spread of a pandemic. A priori of this review, there has been broad international  
35  
36 support for the principles of equitable distribution of medical countermeasures, as  
37  
38 demonstrated by universal support for WHO resolutions<sup>4 8 9 14 63-66</sup>. COVID-19 is no  
39  
40 exception, with relevant commitments passed in months following the declaration of the  
41  
42 pandemic<sup>17 67-70</sup>. This has however not translated into binding global commitments. The  
43  
44 establishment ACT-A and COVAX was partly a recognition of historic failures, as  
45  
46 highlighted in the findings of this review. Co-led by CEPI and Gavi (in partnership with  
47  
48 WHO), both were established with a commitment of equitable access to medicines in their  
49  
50 ethos. As multi-country endorsed initiatives, they can be considered good candidates to lead  
51  
52 the process for equitable distribution of COVID-19 vaccines<sup>12 71-73</sup>.  
53  
54  
55  
56  
57  
58  
59  
60

1  
2  
3 The risks that sovereign states pose to equitable access by acting in their national interest,  
4 including bilateral agreements with pharmaceutical companies, buying up vaccine stocks  
5 during clinical development phases and vaccine hoarding, were anticipated in our findings,  
6 and have, largely, been realized<sup>31</sup>.  
7  
8  
9  
10  
11  
12

13  
14 COVAX's pooled procurement through APAs have faced challenges, initially in accessing the  
15 necessary financing, which in turn delayed securing supply against other HIC purchasers<sup>1 14 27</sup>  
16  
17  
18  
19  
20  
21  
22  
23  
24  
25  
26  
27  
28  
29  
30  
31  
32  
33  
34  
35  
36  
37  
38  
39  
40  
41  
42  
43  
44  
45  
46  
47  
48  
49  
50  
51  
52  
53  
54  
55  
56  
57  
58  
59  
60

29. In addition, it has also faced critique on how price has been determined and whether any costs can be recovered if vaccine candidates fail<sup>34 40 74</sup>. While COVAX has attempted to meet foreseen gaps<sup>14</sup>, it has been challenged by national interests, highlighted recently with announcements that Australia is purchasing booster shots<sup>75</sup>, and that several HICs plan to donate parts of their surplus vaccines to LMICs directly<sup>76</sup>, rather than through the COVAX facility (regardless of membership), making vaccines a tool of geopolitics.

The pandemic has shown several examples of countries enacting their sovereign authority over goods produced within its borders, one example being the USA's invocation of the Defense Production Act reducing export of Active Pharmaceutical Ingredients<sup>77</sup>, which slowed the production of the AstraZeneca vaccine by its collaborator Serum Institute in India<sup>78</sup>. More recently, in response to a devastating second wave of COVID-19 infections, the Indian government imposed an export ban on vaccines, re-directing these to the domestic market, leading to a further slowdown in doses available to the COVAX facility<sup>79</sup>.

Additionally, the redirection of vaccine manufacturing capacity to scale up production of COVID-19 vaccines will likely impact on the production of other vaccines such as influenza, measles, mumps and rubella with a disproportionate impact on the global poor<sup>80</sup>.

1  
2  
3 The rollout of population wide immunization programs has put most governments to the test,  
4 with many being critiqued for botched rollouts. Australia and Japan are two HICs that have  
5 faced criticism over the delays related to the logistical issues of setting up such a large  
6 vaccination program<sup>81 82</sup>. In June 2020, it was reported that less than 15% of imported vaccine  
7 doses in Japan had been used<sup>82</sup>. In addition, Japan is one example of a country whose vaccine  
8 implementation was interrupted by national regulatory requirements for domestic clinical  
9 trials, which could not be undertaken due to low numbers of COVID-19 cases. This prevented  
10 Japan from registering international clinical trials to meet national requirements related to  
11 safety and efficacy<sup>82</sup>. LMICs face similar regulatory delays<sup>27 33</sup>, seemingly a bureaucratic  
12 hurdle that could be planned for, especially given the public health emergency of the  
13 situation, and that these vaccines have already met stringent regulatory standards (i.e., the US  
14 Food and Drug Administration or European Medicines Agency).

15  
16  
17 For LMICs, the well-established child immunization programs have targeted parts of the  
18 population, however few LMICs have extensive experience with vaccination of the general  
19 adult population. This makes the COVID-19 the “first” large-scale adult vaccination program  
20 aiming to achieve high coverage rates<sup>83 84</sup>. To facilitate implementation, COVAX has  
21 integrated a “Country Readiness and Delivery (CRD) work stream” to support the  
22 introduction of COVID-19 vaccines into national vaccination programs<sup>85</sup>. However, lack of  
23 infrastructure, short shelf life and vaccine hesitancy challenge the vaccine uptake and  
24 distribution of vaccines, which has led to vaccine wastage (e.g., South Sudan and Malawi) or  
25 re-deployment to avoid this outcome (e.g., the Democratic Republic of Congo to Ghana and  
26 Madagascar)<sup>86</sup>. Other countries, such as Bhutan, have impressed with their swift  
27 implementation strategies vaccinating 90% of their eligible adult population in two weeks<sup>87</sup>.

1  
2  
3 The potential long-term solution to equitable access highlighted in our scoping review is the  
4 need to broaden the basis of manufacturing of vaccines. A success of the COVID-19 response  
5 has been the high effectiveness of novel mRNA vaccines that (pre-COVID-19) were yet to  
6 enter human clinical trials. However, few manufacturers have the necessary know-how to set  
7 up mRNA manufacturing capacity, resulting in centralized production in a few locations in  
8 the Global North. The WHO has relaunched C-TAP to support a “global one-stop shop for  
9 developers” following nothing being shared by any pharmaceutical company within the first  
10 12 months of the launch of the C-TAP open platform in mid 2020<sup>88 89</sup>. The TRIPS patent  
11 waiver of COVID-19 products received historical support from the incoming US Government  
12 Administration in May 2021, and has since moved into text-based discussions<sup>90</sup>.

13  
14  
15  
16  
17  
18  
19  
20  
21  
22  
23  
24  
25  
26  
27  
28 It is widely acknowledged in the literature that ramping up production in LMICs while  
29 meeting the necessary quality standards takes time and will require extensive knowledge  
30 transfer from pharmaceutical companies. Globally, 15 MICs have vaccine production capacity  
31 to support the global supply of vaccines, but only 12 have WHO prequalification status which  
32 is instrumental for quality assured generic vaccine candidates<sup>2 7</sup>. The pandemic has further  
33 uncovered the need for more vaccine manufacturing capacity across the whole world. The  
34 acknowledgment of the incommensurable role of manufacturing capacity is captured in a  
35 project led by CEPI to map out manufacturing capacity for use in future pandemics<sup>91</sup>. Further,  
36 to counteract this, the African Union and African CDC launched a partnership to increase  
37 future vaccine production in Africa<sup>92</sup>.

38  
39  
40  
41  
42  
43  
44  
45  
46  
47  
48  
49  
50  
51  
52  
53  
54 A limitation of this scoping review is that literature was exclusively chosen based on  
55 relevance to the topic of identifying and describing potential factors influencing equitable  
56 access to COVID-19 vaccines, meaning that we have included commentaries, editorials,  
57  
58  
59  
60

1  
2  
3 essays and viewpoints. We determined that these perspectives were of importance to our  
4  
5 research aim, regardless of the type of publication, as the aim was to identify factors and not  
6  
7 to assess or evaluate them or compare their relative importance. In light of the nature of the  
8  
9 current situation and the topic, restricting the review to only include publications of original  
10  
11 research with journal publication timeframes did not seem appropriate. Although many of the  
12  
13 authors of the included literature are established academics or practitioners in their field, this  
14  
15 is a limitation. To manage this , articles were only included if they were published in a peer-  
16  
17 reviewed journal.  
18  
19  
20  
21  
22

## 23 **CONCLUSION**

24  
25 According to current available published peer-reviewed literature, equitable access to  
26  
27 vaccines proves to be an ongoing challenge. The uneven global distribution of vaccines is  
28  
29 starkly shown in the current divide of vaccine coverage where the wealthiest nations have  
30  
31 received more than 87% of the vaccines whilst LMICs just 0.2%<sup>93</sup>. Altogether, findings  
32  
33 identified in this scoping review converge towards vaccine manufacturing being of high  
34  
35 importance in the supply of vaccines. Future research could explore the contribution of MICs  
36  
37 to facilitate vaccine supply in a pandemic, including some of the challenges of maintaining  
38  
39 these facilities outside of a pandemic. Building on COVID-19 success, mRNA technologies  
40  
41 will be used for other vaccines in the future, thus the exploration and scale-up of such  
42  
43 capacities on the African continent is likely to prove to be a valuable investment, even after  
44  
45 the pandemic. Moreover, despite the length of time it takes to build and certify vaccine  
46  
47 manufacturing facilities, steps can be taken to share the know-how of the manufacturing of  
48  
49 effective vaccines, although the full possibilities of relaxing of patent and IPR are yet to be  
50  
51 realized and can contribute to equitable access.  
52  
53  
54  
55  
56  
57  
58  
59  
60



1  
2  
3 Another issue identified in the literature was the role that patent holders play in global  
4 governance through influencing the distribution of COVID-19 vaccines, this needs more  
5 transparency. The importance of including equitable access principles to all levels of  
6 development also seemed to be relevant, e.g., throughout vaccine R&D, procurement, scale-  
7 up and distribution.  
8  
9  
10  
11  
12  
13  
14  
15  
16

## 17 **ETHICS STATEMENT**

18 Ethical clearance was not required as the review used secondary data that is available in the  
19 public domain.  
20  
21  
22  
23  
24  
25

## 26 **CONTRIBUTORS**

27  
28 EP and LC: Developed the concept, drafted the protocol, data extraction, analysis, writing and  
29 review. LH: Data extraction, supported with analysis, writing and review. KF: Methodology,  
30 review of extraction, writing and review. EHD: Writing and review.  
31  
32  
33  
34  
35  
36  
37

## 38 **ACKNOWLEDGEMENTS**

39 Thank you to the following people who helped develop or offered their feedback on the  
40 original concept of this scoping review: Marit Johansen (Information Specialist), Benedikte  
41 Louise Alveberg, Tenu Avafia, Julia Bidonde, Anita Haslie, Unni Gopinathan, Adam  
42 Kamradt-Scott, Ida Kristine Lindkvist, Jasper Littman, Trygve Ottersen, Judit Rius Sanjuan,  
43 Ingvil Sæterdal, Christine Årdal.  
44  
45  
46  
47  
48  
49  
50

51 **DATA SHARING:** No additional data available

52 **COMPETING INTERESTS:** None declared.

53 **PATIENT INVOLVEMENT:** No patient involved  
54  
55  
56  
57  
58  
59  
60

1  
2  
3 **FUNDING:** This work was partially supported by the Evaluation Department of the  
4  
5 Norwegian Agency for Development Cooperation (Norad) in their role as a member of the  
6  
7 OECD COVID-19 Global Evaluation Coalition (Grant number 1900737), and Norad  
8  
9 Department of Education and Health (Grant number QZA-18/0102). The funders had no role  
10  
11 in the study design, data collection and analysis, decision to publish, or preparation of the  
12  
13 manuscript.  
14  
15  
16  
17  
18  
19  
20  
21  
22  
23  
24  
25  
26  
27  
28  
29  
30  
31  
32  
33  
34  
35  
36  
37  
38  
39  
40  
41  
42  
43  
44  
45  
46  
47  
48  
49  
50  
51  
52  
53  
54  
55  
56  
57  
58  
59  
60

For peer review only

## References

1. Eccleston-Turner M, Upton H. International Collaboration to Ensure Equitable Access to Vaccines for COVID-19: The ACT-Accelerator and the COVAX Facility. *Milbank Quarterly* 2021 doi: 10.1111/1468-0009.12503
2. Gavi the Vaccine Alliance. COVAX, the act-accelerator vaccines pillar- Insuring accelerated vaccine development and manufacture: Gavi; 2020 [cited 2020 August 3]. Available from: <https://www.gavi.org/sites/default/files/covid/COVAX-Pillar-background.pdf> accessed August 3 2020.
3. National Academies of Sciences E, Medicine, Health, et al. Framework for Equitable Allocation of COVID-19 Vaccine. *National Academies Press (US)* 2020;10:02. doi: <https://dx.doi.org/10.17226/25917>
4. WHA56.19 Prevention and control of influenza pandemics and annual epidemics. Resolution of the Fifty-Sixth World Health Assembly Tenth plenary meeting; 2003.
5. Bollyky TJ, Gostin LO, Hamburg MA. The Equitable Distribution of COVID-19 Therapeutics and Vaccines. *Jama* 2020;07:07. doi: <https://dx.doi.org/10.1001/jama.2020.6641>
6. Eccleston-Turner M. The pandemic influenza preparedness framework: A viable procurement option for developing states? *Medical Law International* 2017;17(4):227-48. doi: <http://dx.doi.org/10.1177/0968533217723683>
7. Fedson DS, Dunnill P. Commentary: From scarcity to abundance: pandemic vaccines and other agents for "have not" countries. *J Public Health Policy* 2007;28(3):322-40.
8. World Health Organization. Global pandemic influenza action plan to increase vaccine supply: Geneva: World Health Organization, 2006.
9. World Health Organization. Brief history of the development of the Framework on Sharing influenza viruses and access to vaccines and other benefits 2011 [cited 2020 December 15]. Available from: <https://www.who.int/influenza/pip/history/en/> accessed December 15 2020.
10. World Health Organization. Pandemic influenza preparedness framework for the sharing of influenza viruses and access to vaccines and other benefits. 2011
11. World Health Organization. The Access to COVID-19 Tools (ACT) Accelerator, 2020.
12. Gavi the Vaccine Alliance. About our alliance. Gavi the Vaccine Alliance,: Gavi the Vaccine Alliance,, 2020.
13. Herlitz A, Lederman Z, Miller J, et al. Just allocation of COVID-19 vaccines. *BMJ Global Health* 2021;6(2):02. doi: <https://dx.doi.org/10.1136/bmjgh-2020-004812>
14. Ana Santos R. The COVID-19 Vaccine Race: Intellectual Property, Collaboration(s), Nationalism and Misinformation. *SSRN* 2020 doi: 10.2139/ssrn.3656929
15. World Health Organization. Health Topics: Health Equity 2020 [cited 2020 August 12]. Available from: [https://www.who.int/topics/health\\_equity/en/](https://www.who.int/topics/health_equity/en/) accessed August 12 2020.
16. World Health Organization. Essential medicines and health products. Essential medicines definition 2020 [cited 2020 August 13]. Available from: [https://www.who.int/medicines/services/essmedicines\\_def/en/](https://www.who.int/medicines/services/essmedicines_def/en/) accessed August 13 2020.
17. World Health Organization. More than 150 countries engaged in COVID-19 vaccine global access facility 2020 [updated July 15 2020. Available from: <https://www.who.int/news-room/detail/15-07-2020-more-than-150-countries-engaged-in-covid-19-vaccine-global-access-facility>.
18. World Health Organization. WHO Concept for fair access and equitable allocation of COVID-19 health products: Final working version 9 September 2020. Geneva: World Health Organization, 2020.
19. Emanuel EJ, Persad G, Kern A, et al. An ethical framework for global vaccine allocation. *Science* 2020;369(6509):1309-12.

- 1
  - 2
  - 3
  - 4
  - 5
  - 6
  - 7
  - 8
  - 9
  - 10
  - 11
  - 12
  - 13
  - 14
  - 15
  - 16
  - 17
  - 18
  - 19
  - 20
  - 21
  - 22
  - 23
  - 24
  - 25
  - 26
  - 27
  - 28
  - 29
  - 30
  - 31
  - 32
  - 33
  - 34
  - 35
  - 36
  - 37
  - 38
  - 39
  - 40
  - 41
  - 42
  - 43
  - 44
  - 45
  - 46
  - 47
  - 48
  - 49
  - 50
  - 51
  - 52
  - 53
  - 54
  - 55
  - 56
  - 57
  - 58
  - 59
  - 60
20. Herzog LM, Norheim OF, Emanuel EJ, et al. Covax must go beyond proportional allocation of covid vaccines to ensure fair and equitable access. *Bmj* 2021;372
21. Tricco AC, Lillie E, Zarin W, et al. PRISMA extension for scoping reviews (PRISMA-ScR): checklist and explanation. *Ann Intern Med* 2018;169(7):467-73.
22. Arksey H, O'Malley L. Scoping studies: towards a methodological framework. *International journal of social research methodology* 2005;8(1):19-32.
23. Liu Y, Salwi S, Drolet BC. Multivalued ethical framework for fair global allocation of a COVID-19 vaccine. *Journal of medical ethics* 2020;46(8):499-501. doi: 10.1136/medethics-2020-106516
24. DeFrancesco L. Whither COVID-19 vaccines? *Nature Biotechnology* 2020;38(10):1132-45. doi: <https://dx.doi.org/10.1038/s41587-020-0697-7>
25. Felicitas H, Florencia L, Manriquez RT, et al. A matter of priority: equitable access to COVID-19 vaccines. *Swiss medical weekly* 2021;151 doi: 10.4414/smw.2021.20488
26. Fidler DP. Vaccine nationalism's politics. *Science* 2020;369(6505):749. doi: <https://dx.doi.org/10.1126/science.abe2275>
27. Forman R, Shah S, Jeurissen P, et al. COVID-19 vaccine challenges: What have we learned so far and what remains to be done? *Health Policy* 2021;125(5):553-67. doi: <https://dx.doi.org/10.1016/j.healthpol.2021.03.013>
28. Gray G, van der Heever A, Madhi S, et al. The Scientists' Collective 10-point proposal for equitable and timely access to COVID-19 vaccine in South Africa. *Samj South African Medical Journal* 2021;111(2):89-94. doi: 10.7196/SAMJ.2021.v111i2.15498
29. Guzman J, Hafner T, Maiga LA, et al. COVID-19 vaccines pricing policy options for low-income and middle-income countries. *BMJ Global Health* 2021;6(3):03. doi: <https://dx.doi.org/10.1136/bmjgh-2021-005347>
30. Kamradt-Scott A, Lee K. The 2011 Pandemic Influenza Preparedness Framework: Global Health Secured or a Missed Opportunity? *Political Studies* 2011;59(4):831-47. doi: 10.1111/j.1467-9248.2011.00926.x
31. Kupferschmidt K. Despite obstacles, WHO unveils plan to distribute vaccine. *Science* 2020;369(6511):1553. doi: <https://dx.doi.org/10.1126/science.369.6511.1553>
32. McAdams D, McDade KK, Ogbuonji O, et al. Incentivising wealthy nations to participate in the COVID-19 Vaccine Global Access Facility (COVAX): a game theory perspective. *BMJ Global Health* 2020;5(11):11. doi: <https://dx.doi.org/10.1136/bmjgh-2020-003627>
33. Nhamo G, Chikodzi D, Kunene HP, et al. COVID-19 vaccines and treatments nationalism: Challenges for low-income countries and the attainment of the SDGs. *Global Public Health* 2021;16(3):319-39. doi: <https://dx.doi.org/10.1080/17441692.2020.1860249>
34. Phelan AL, Eccleston-Turner M, Rourke M, et al. Legal agreements: barriers and enablers to global equitable COVID-19 vaccine access. *Lancet* 2020;396(10254):800-02. doi: [https://dx.doi.org/10.1016/S0140-6736\(20\)31873-0](https://dx.doi.org/10.1016/S0140-6736(20)31873-0)
35. Saksena N. Global justice and the COVID-19 vaccine: Limitations of the public goods framework. *Glob Public Health* 2021 doi: 10.1080/17441692.2021.1906926
36. Sehovic AB, Govender K. Addressing COVID-19 vulnerabilities: How do we achieve global health security in an inequitable world. *Global Public Health* doi: 10.1080/17441692.2021.1916056
37. So AD, Woo J. Achieving path-dependent equity for global COVID-19 vaccine allocation. *Medicina Intensiva* 2021;2(4):373-77. doi: <https://dx.doi.org/10.1016/j.medj.2021.03.004>
38. Soares AA. Ensuring equitable access to COVID-19 vaccines. *Bulletin of the World Health Organization* 2020;98(12):826-27. doi: 10.2471/blt.20.021220
39. The Lancet Editorial. Global governance for COVID-19 vaccines. *Lancet (London, England)* 2020;395(10241):1883. doi: 10.1016/s0140-6736(20)31405-7
40. Towse A, Chalkidou K, Firth I, et al. How Should the World Pay for a Coronavirus Disease (COVID-19) Vaccine? *Value in Health* 2021;24(5):625-31. doi: <https://dx.doi.org/10.1016/j.jval.2020.12.008>
41. Yamey G, Schäferhoff M, Hatchett R, et al. Ensuring global access to COVID-19 vaccines. *Lancet (London, England)* 2020;395(10234):1405-06. doi: 10.1016/s0140-6736(20)30763-7

- 1  
2  
3 42. Fidler DP. Negotiating Equitable Access to Influenza Vaccines: Global Health Diplomacy and the  
4 Controversies Surrounding Avian Influenza H5N1 and Pandemic Influenza H1N1. *Plos*  
5 *Medicine* 2010;7(5) doi: 10.1371/journal.pmed.1000247  
6  
7 43. Rourke MF. Access by Design, Benefits if Convenient: A Closer Look at the Pandemic Influenza  
8 Preparedness Framework's Standard Material Transfer Agreements. *Milbank Q*  
9 2019;97(1):91-112. doi: <https://dx.doi.org/10.1111/1468-0009.12364>  
10  
11 44. Sawal I, Ahmad S, Tariq W, et al. Unequal distribution of COVID-19 vaccine: A looming crisis.  
12 *Journal of Medical Virology* 2021;03:03. doi: <https://dx.doi.org/10.1002/jmv.27031>  
13  
14 45. Sharma S, Kawa N, Gomber A. WHO's allocation framework for COVAX: is it fair? *Journal of*  
15 *Medical Ethics* 2021;09:09. doi: <https://dx.doi.org/10.1136/medethics-2020-107152>  
16  
17 46. Usher AD. South Africa and India push for COVID-19 patents ban. *Lancet* 2020;396(10265):1790-  
18 91. doi: [https://dx.doi.org/10.1016/S0140-6736\(20\)32581-2](https://dx.doi.org/10.1016/S0140-6736(20)32581-2)  
19  
20 47. Wouters OJ, Shadlen KC, Salcher-Konrad M, et al. Challenges in ensuring global access to COVID-  
21 19 vaccines: production, affordability, allocation, and deployment. *Lancet*  
22 2021;397(10278):1023-34. doi: [https://dx.doi.org/10.1016/S0140-6736\(21\)00306-8](https://dx.doi.org/10.1016/S0140-6736(21)00306-8)  
23  
24 48. Abbott FM, Reichman JH. Facilitating Access to Cross-Border Supplies of Patented  
25 Pharmaceuticals: The Case of the COVID-19 Pandemic. *Journal of International Economic Law*  
26 2020;23(3):535-61. doi: 10.1093/jiel/jgaa022  
27  
28 49. Iacobucci G. Covid-19: How will a waiver on vaccine patents affect global supply? *BMJ*  
29 2021;373:n1182. doi: <https://dx.doi.org/10.1136/bmj.n1182>  
30  
31 50. McMahon A. Global equitable access to vaccines, medicines and diagnostics for COVID-19: The  
32 role of patents as private governance. *Journal of Medical Ethics* 2020;30:30. doi:  
33 <https://dx.doi.org/10.1136/medethics-2020-106795>  
34  
35 51. Fedson DS. Preparing for pandemic vaccination: an international policy agenda for vaccine  
36 development. *J Public Health Policy* 2005;26(1):4-29.  
37  
38 52. Fedson DS. Pandemic influenza and the global vaccine supply. *Clin Infect Dis* 2003;36(12):1552-  
39 61.  
40  
41 53. Forman R, Anderson M, Jit M, et al. Ensuring access and affordability through COVID-19 vaccine  
42 research and development investments: A proposal for the options market for vaccines.  
43 *Vaccine* 2020;38(39):6075-77. doi: <https://dx.doi.org/10.1016/j.vaccine.2020.07.068>  
44  
45 54. So AD, Woo J. Reserving coronavirus disease 2019 vaccines for global access: cross sectional  
46 analysis. *Bmj-British Medical Journal* 2020;371 doi: 10.1136/bmj.m4750  
47  
48 55. Usher AD. CEPI criticised for lack of transparency. *Lancet* 2021;397(10271):265-66. doi:  
49 [https://dx.doi.org/10.1016/S0140-6736\(21\)00143-4](https://dx.doi.org/10.1016/S0140-6736(21)00143-4)  
50  
51 56. Choi EM. COVID-19 vaccines for low- and middle-income countries. *Transactions of the Royal*  
52 *Society of Tropical Medicine & Hygiene* 2021;115(5):447-56. doi:  
53 <https://dx.doi.org/10.1093/trstmh/trab045>  
54  
55 57. The Lancet. Access to COVID-19 vaccines: looking beyond COVAX. *Lancet* 2021;397(10278):941.  
56 doi: [https://dx.doi.org/10.1016/S0140-6736\(21\)00617-6](https://dx.doi.org/10.1016/S0140-6736(21)00617-6)  
57  
58 58. Torres I, Artaza O, Profeta B, et al. COVID-19 vaccination: returning to WHO's Health For All. *The*  
59 *Lancet Global Health* 2020;8(11):e1355-e56. doi: [https://dx.doi.org/10.1016/S2214-109X\(20\)30415-0](https://dx.doi.org/10.1016/S2214-109X(20)30415-0)  
60  
61 59. Turner M. Vaccine procurement during an influenza pandemic and the role of Advance Purchase  
62 Agreements: Lessons from 2009-H1N1. *Glob Public Health* 2016;11(3):322-35. doi:  
63 <https://dx.doi.org/10.1080/17441692.2015.1043743>  
64  
65 60. Pagliusi S, Dennehy M, Kim H, et al. Vaccines, inspiring innovation in health. *Vaccine*  
66 2018;36(48):7430-37. doi: <https://dx.doi.org/10.1016/j.vaccine.2018.05.035>  
67  
68 61. Ruscio BA, Hotez P. Expanding global and national influenza vaccine systems to match the COVID-  
69 19 pandemic response. *Vaccine* 2020;38(50):7880-82. doi:  
70 <http://dx.doi.org/10.1016/j.vaccine.2020.10.055>  
71

- 1
  - 2
  - 3
  - 4
  - 5
  - 6
  - 7
  - 8
  - 9
  - 10
  - 11
  - 12
  - 13
  - 14
  - 15
  - 16
  - 17
  - 18
  - 19
  - 20
  - 21
  - 22
  - 23
  - 24
  - 25
  - 26
  - 27
  - 28
  - 29
  - 30
  - 31
  - 32
  - 33
  - 34
  - 35
  - 36
  - 37
  - 38
  - 39
  - 40
  - 41
  - 42
  - 43
  - 44
  - 45
  - 46
  - 47
  - 48
  - 49
  - 50
  - 51
  - 52
  - 53
  - 54
  - 55
  - 56
  - 57
  - 58
  - 59
  - 60
62. Sadeghi R, Masoudi MR, Khanjani N. The commitment for fair distribution of COVID-19 vaccine among all countries of the world. *Res Nurs Health* 2021;44(2):266-67. doi: <https://dx.doi.org/10.1002/nur.22112>
63. World Health Assembly Resolution. WHA 61.21. Global strategy and plan of action on public health, innovation and intellectual property. *61st World Health Assembly, Geneva, 19-24 May 2008* 2008
64. World Health Assembly Resolution. WHA65.17 Global vaccine action plan. *65th World Health Assembly, Geneva, 26 May 2012* 2012
65. World Health Assembly Resolution. WHA67. 21. Access to biotherapeutic products including similar biotherapeutics products and ensuring their quality, safety and efficacy. *Sixty-Seventh World Health Assembly* 2014
66. World Health Assembly Resolution. WHA67.22 Access to essential medicines. *Sixty-seventh World Health Assembly* 2014
67. World Health Assembly Resolution. WHA70.3 COVID-19 response. *Seventy-Third World Health Assembly 18 May 2020* 2020
68. World Health Organization. Endorsements of the Solidarity Call to Action 2020 [cited 2020 September 23]. Available from: <https://www.who.int/emergencies/diseases/novel-coronavirus-2019/global-research-on-novel-coronavirus-2019-ncov/covid-19-technology-access-pool/endorsements-of-the-solidarity-call-to-action> accessed September 24 2020.
69. World Health Organization. COVID-19 Technology Access Pool launch. In: World Health Organization, ed. Geneva, 2020.
70. World Health Organization. A global framework to ensure equitable and fair allocation of Covid-19 products. In: WHO, ed. Geneva: WHO, 2020.
71. Huneycutt B, Lurie N, Rotenberg S, et al. Finding equipoise: CEPI revises its equitable access policy. *Vaccine* 2020;38(9):2144-48.
72. Coalition for Epidemic Preparedness Innovations. CEPI Policy Documentation: Equitable access policy 2017 [updated 2017. Available from: [https://msfaccess.org/sites/default/files/2018-09/CEPIoriginalPolicy\\_2017.pdf](https://msfaccess.org/sites/default/files/2018-09/CEPIoriginalPolicy_2017.pdf) accessed December 17 2020.
73. Coalition for Epidemic Preparedness Innovations. Equitable Access Policy - 2019 Oslo Coalition for Epidemic Preparedness Innovations,; 2019 [cited 2020 23 July]. Available from: <https://cepi.net/wp-content/uploads/2019/01/Equitable-Access-Policy.pdf> accessed 23 July 2020.
74. Rizvi Z. COVAX's choices. Washington D.C.: Public Citizen,, 2020.
75. Australian Broadcasting Corporation. Millions of Pfizer booster shots locked in as government plans to continue vaccinations into 2023 2021 [cited 2021 26 July]. Available from: <https://www.abc.net.au/news/2021-07-25/australia-secures-millions-of-pfizer-covid19-booster-shots/100321632>.
76. New York Times. First U.S. Vaccines Will Go to 'Wide Range' of Nations In Need: New York Times; 2021 [cited 2021 20 June]. Available from: <https://www.nytimes.com/2021/06/03/us/politics/vaccine-donations-coronavirus-biden.html>.
77. US Government International Development Finance Corporation. Defense Production Act (DPA) 2021 [cited 2021 15 June]. Available from: <https://www.dfc.gov/dpa> accessed 15 June 2021.
78. Mascarenhas A, Raghavan P. Shortage of vaccine raw materials, SII CEO to Biden: End export embargo: The Indian Express; 2021 [cited 2021 15 June]. Available from: <https://indianexpress.com/article/india/covid-vaccine-export-raw-material-sii-adar-poonawalla-serum-institute-7277089> accessed 15 June 2021.
79. Arora N, Das K, Jain R. EXCLUSIVE: India unlikely to resume sizable COVID-19 vaccine exports until October: Reuters; 2021 [cited 2021 15 June]. Available from: <https://www.reuters.com/world/india/exclusive-india-unlikely-resume-sizable-covid-19-vaccine-exports-until-october-2021-05-18/> accessed 15 June 2021.

- 1  
2  
3 80. Khamsi R. If a coronavirus vaccine arrives, can the world make enough. *Nature* 2020 April 9  
4 2020;578.
- 5 81. Smyth J. Australian PM apologises for slow Covid vaccine rollout as cases rise: Financial Times;  
6 2021 [Available from: <https://www.ft.com/content/0d5be58c-ff44-4186-91e7-000658cc4e67>  
7 accessed 22 July 2021.
- 8 82. Kosaka M, Hashimoto T, Ozaki A, et al. Delayed COVID-19 vaccine roll-out in Japan. *The Lancet*  
9 2021
- 10 83. Mihigo R, Torrealba CV, Coninx K, et al. 2009 Pandemic Influenza A Virus Subtype H1N1  
11 Vaccination in Africa—Successes and Challenges. *The Journal of Infectious Diseases*  
12 2012;206(suppl\_1):S22-S28. doi: 10.1093/infdis/jis535
- 13 84. World Health Organization Regional Office for Africa. H1N1 Pandemic Influenza Vaccine  
14 Deployment in the African Region: Debriefing Meeting: World Health Organization Regional  
15 Office for Africa, 2010.
- 16 85. World Health Organization. COVID-19 vaccine country readiness and delivery: World Health  
17 Organization; 2021 [cited 2021 20 June]. Available from: [https://www.who.int/initiatives/act-  
18 accelerator/covax/covid-19-vaccine-country-readiness-and-delivery](https://www.who.int/initiatives/act-accelerator/covax/covid-19-vaccine-country-readiness-and-delivery) accessed 20 June 2021.
- 19 86. Mwai P. Covid-19 vaccines: Why some African states can't use their vaccines British Broadcastsing  
20 Corporation, : British Broadcastsing Corporation, ; 2021 [cited 2021 21 Junw]. Available from:  
21 <https://www.bbc.com/news/56940657> accessed 21 June 2021.
- 22 87. Samarasekera U. Bhutan: small nation, big ideas affecting respiratory health. *Lancet Respir Med*  
23 2021
- 24 88. Deutsche Welle.com. The COVID-19 vaccines: Where do they come from? Where will they go? :  
25 Deutsche Welle; 2021 [cited 2021 27 July]. Available from: [https://www.dw.com/en/the-  
26 covid-19-vaccines-where-do-they-come-from-where-will-they-go/a-56134178](https://www.dw.com/en/the-covid-19-vaccines-where-do-they-come-from-where-will-they-go/a-56134178) accessed 27  
27 July 2021.
- 28 89. World Health Organization. Establishment of a COVID-19 mRNA vaccine technology transfer hub  
29 to scale up global manufacturing: World Health Organization; 2021 [updated 16 April 2021;  
30 cited 2021 27 July]. Available from: [https://www.who.int/news-room/articles-  
31 detail/establishment-of-a-covid-19-mrna-vaccine-technology-transfer-hub-to-scale-up-  
32 global-manufacturing](https://www.who.int/news-room/articles-detail/establishment-of-a-covid-19-mrna-vaccine-technology-transfer-hub-to-scale-up-global-manufacturing) accessed 27 July 2021.
- 33 90. World Health Organization. WHO Director-General commends United States decision to support  
34 temporary waiver on intellectual property rights for COVID-19 vaccines: World Health  
35 Organization; 2021 [updated 5 May 2021; cited 2021 15 June]. Available from:  
36 [https://www.who.int/news/item/05-05-2021-who-director-general-commends-united-  
37 states-decision-to-support-temporary-waiver-on-intellectual-property-rights-for-covid-19-  
38 vaccines](https://www.who.int/news/item/05-05-2021-who-director-general-commends-united-states-decision-to-support-temporary-waiver-on-intellectual-property-rights-for-covid-19-vaccines) accessed 15 June 2021.
- 39 91. Coation for Epidemic Preparedness Innovations. Survey launched by CEPI to track multinational  
40 vaccine manufacturing capacity for use in future epidemics and pandemics: Coation for  
41 Epidemic Preparedness Innovations,; 2021 [updated 19 May 2021; cited 2021 15 June].  
42 Available from: [https://cepi.net/news\\_cepi/survey-launched-by-cepi-to-track-multinational-  
43 vaccine-manufacturing-capacity-for-use-in-future-epidemics-and-pandemics/](https://cepi.net/news_cepi/survey-launched-by-cepi-to-track-multinational-vaccine-manufacturing-capacity-for-use-in-future-epidemics-and-pandemics/) accessed 15  
44 June 2021.
- 45 92. Africa Union and Africa Centers for Disease and Prevention. African Union and Africa CDC  
46 launches Partnerships for African Vaccine Manufacturing (PAVM), framework to achieve it  
47 and signs 2 MoUs: Africa Union and Africa Centers for Disease and Prevention; 2021  
48 [updated 16 April 2021; cited 2021 15 June]. Available from: [https://africacdc.org/news-  
49 item/african-union-and-africa-cdc-launches-partnerships-for-african-vaccine-manufacturing-  
50 pavm-framework-to-achieve-it-and-signs-2-mous/](https://africacdc.org/news-item/african-union-and-africa-cdc-launches-partnerships-for-african-vaccine-manufacturing-pavm-framework-to-achieve-it-and-signs-2-mous/)
- 51 93. United Nations. Low-income countries have received just 0.2 per cent of all COVID-19 shots given:  
52 United Nations; 2021 [updated 9 April 2021; cited 2021 21 June]. Available from:  
53 <https://news.un.org/en/story/2021/04/1089392> accessed 21 June 2021
- 54  
55  
56  
57  
58  
59  
60

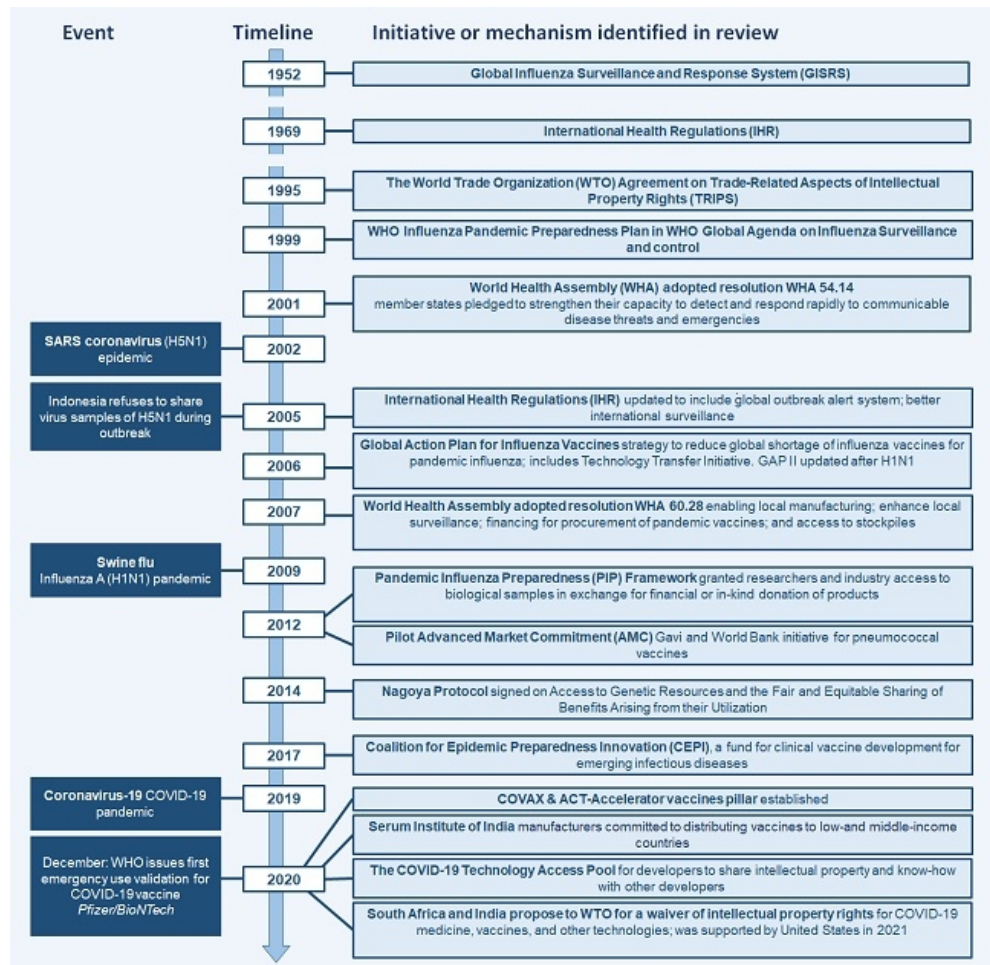

Figure 1: Timeline of events and relevant initiatives

127x122mm (130 x 130 DPI)



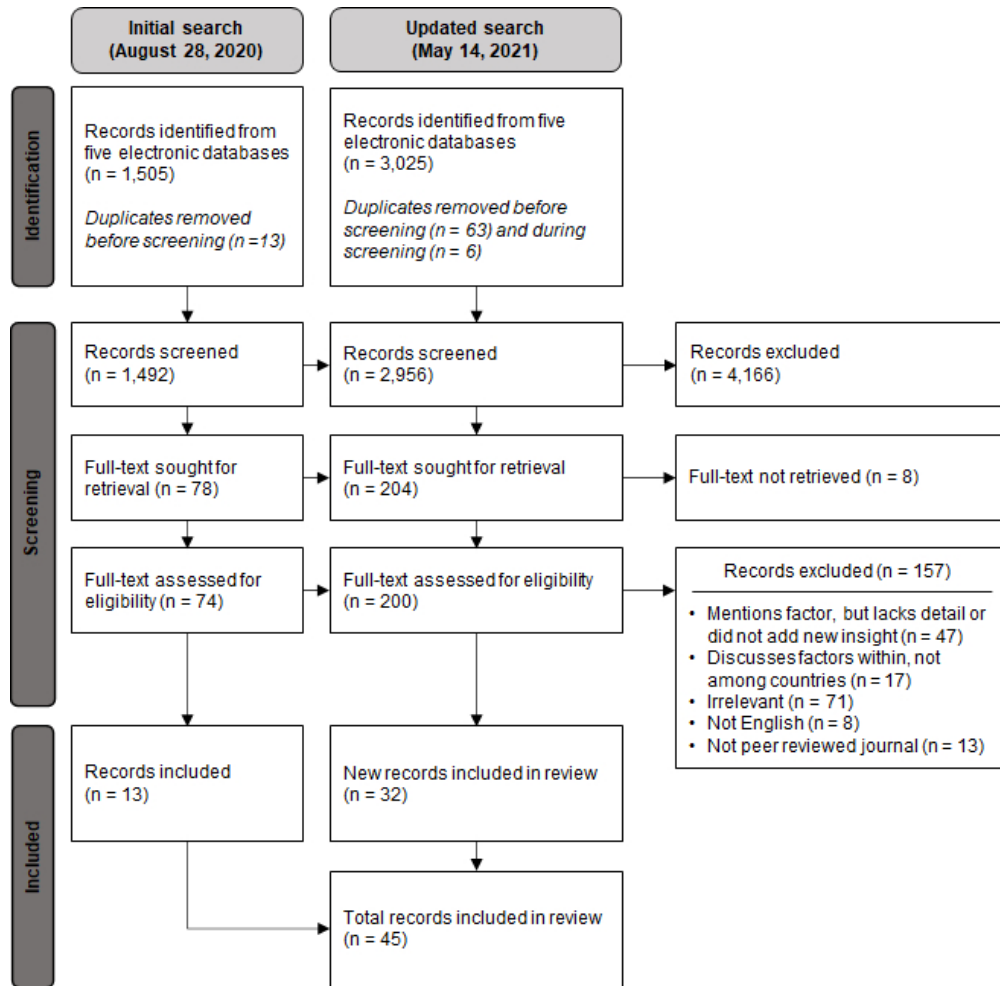

Figure 2: PRISMA flow-chart for selection of articles

327x321mm (51 x 51 DPI)

1  
2  
3  
4  
5  
6  
7  
8  
9  
10 Appendix 2: Updated protocol  
11  
12  
13  
14  
15  
16

17  
18  
19  
20  
21  
22  
23  
24  
25

# Factors influencing global equitable access to a COVID-19 vaccine for Low- and Middle- Income Countries (LMICs)

---

26 Proposal for scoping review

27  
28 24 September 2020

29  
30 Elizabeth Peacocke, Lumbwe Chola, Katrine Frønsdal and Marita Fønhus, Norwegian  
31 Institute Public Health.  
32

33  
34 Updated 24 July 2021

35  
36 Elizabeth Peacocke, Lieke Fleur Heupink, Katrine Frønsdal, Elin Hoffmann Dahl and  
37 Lumbwe Chola.  
38  
39  
40  
41  
42  
43  
44  
45  
46  
47  
48  
49  
50  
51  
52  
53  
54  
55  
56  
57  
58  
59  
60

# Summary

Vaccines are important medical countermeasures to prevent the spread of infectious diseases. The World Bank forecasts a 5.2% contraction in global GDP in 2020, and long-term negative impacts are expected in terms of lower investment, an erosion of human capital through lost work and schooling, and fragmentation of global trade and supply linkages (1) Without effective vaccines, diagnostics, and therapeutics, COVID-19 will continue to spread and have severe health and socio-economic consequences. The UN's Framework for the Immediate Socio-Economic Response to the COVID 19 Crisis warns "The COVID-19 pandemic is far more than a health crisis: it is affecting societies and economies at their core. While the impact of the pandemic will vary from country to country, it will most likely increase poverty and inequalities at a global scale, making achievement of SDGs even more urgent." (2)

This project includes a scoping review that identifies and characterizes the factors influencing global equitable access to COVID-19 vaccines among countries, and contextualizes these factors with global mechanisms or guidelines that address global equitable access to pandemic vaccines. The documentation of these factors will offer decision makers lessons from previous experiences and information to support the understanding of principles related to equitable access to a COVID-19 vaccine.

This scoping review was conducted during August-November 2020, with a draft report for Norad, who commissioned and partly financed the report. This draft report was then submitted as a manuscript for publication. During the review process, in May 2021, the authors updated the search. This protocol has been updated to reflect the methods used in this Scoping Review.

To our knowledge, such a scoping review has not been systematically investigated.

**Title:**

Factors influencing global equitable access to a COVID-19 vaccine for Low- and Middle- Income Countries (LMICs)

-----  
Proposal for scoping review  
-----

**Commissioned by:**

Commissioned by the Norad Evaluation Department

**Start date:**

24.07.2020.

**End date:**

19.07.2021  
-----

**Project Team:**

Elizabeth Peacocke, Senior Advisor, NIPH  
Lieke Fleur Heupink, Advisor, NIPH  
Elin Hoffmann Dahl, MD, Haukeland Universitetssjukehus, Norway  
Katrine Frønsdal, Senior Researcher, NIPH  
Lumbwe Chola, Senior Advisor, NIPH

**Internal peer review:**

Maria Fønhus, Senior researcher, NIPH

**Approved by:**

Ingvil Sæterdal, Department Director, NIPH, Global Health

---

# Background

---

## New Corona Virus: SARS-CoV-2 (COVID-19) Pandemic

---

The world is currently facing a global public health emergency with the emergence of the Severe acute respiratory syndrome coronavirus 2 discovered in 2019 (COVID-19), an infectious acute respiratory disease caused by a novel coronavirus. A race to increase access to existing health technologies – including diagnostics - and find new and effective treatments and vaccine is underway, and with this the international community is faced with the challenge of how to ensure equitable access of essential medicines<sup>1</sup> to all populations. In this scoping review, we will systematically review the literature and summarize factors pertaining to the equitable access of a COVID-19 vaccine relevant for low- and middle- income countries (LMICs). For the purpose of this study, we are using the WHO definition of equity,<sup>2</sup> and we take the principle that the COVID-19 vaccine is an essential medicine<sup>3</sup>, and that access to essential medicines is part of the right to health which is well founded in international law (4).

---

## The challenge with global equitable availability and access to pandemic vaccines

---

COVID-19 has seen a large effort and investment in vaccines, and diagnostics, with 22 manufacturers that have applied for and Emergency Use Listing under the WHO Pre-Qualification, 10 of which have been approved (5). Shortly following these rapid advances and regulatory approvals, questions began to be raised about the availability and access of vaccines in LMIC, and as global public goods (6, 7).

The 2005 experience with the sharing of avian influenza A (H5N1) and the 2009 influenza A (H1N1) pandemic made apparent the need for equity considerations and ensuring that global coordination and distribution mechanisms are in place and adhered to, supporting equitable access to scarce vaccines. During H5N1, concerns raised by LMICs about the lack of mechanisms for ensuring global equitable access to vaccines prompted Indonesia to refuse to share H5N1 virus samples with the World Health Organization (WHO) (8). With Asia being the epicenter of the outbreak, fears were raised by the international community that Indonesia's refusal to share virus samples would impede the research and development, surveillance and response efforts, and made the response to the global health emergency more difficult. Ensuing negotiations with the

---

<sup>1</sup>Essential medicines are those that satisfy the priority health care needs of the population 3. World Health Organization. Essential medicines and health products. Essential medicines definition 2020 [cited 2020 August 13]. Available from: [https://www.who.int/medicines/services/essmedicines\\_def/en/](https://www.who.int/medicines/services/essmedicines_def/en/).

<sup>2</sup>Equity is the absence of avoidable, unfair, or remediable differences among groups of people, whether those groups are defined socially, economically, demographically or geographically or by other means of stratification. "Health equity" or "equity in health" implies that ideally everyone should have a fair opportunity to attain their full health potential and that no one should be disadvantaged from achieving this potential (World Health Organization. Health Topics: Health Equity. 2020 [cited 2020 August 12]; Available from: [https://www.who.int/topics/health\\_equity/en/](https://www.who.int/topics/health_equity/en/)).

<sup>3</sup> WHO (2020)

1 WHO and its member states to create a new system of influenza virus sharing and vac-  
2 cine availability did not immediately yield consensus.  
3

4 During the 2009 pandemic, high income countries (HIC) bought virtually all vaccine  
5 supplies, leaving limited supplies for LMICs. One prominent example for this asym-  
6 metry was Mexico. Despite it being one of the first nations affected by H1N1 (concur-  
7 rently with Canada and the United States), Mexico gained access to vaccines much later  
8 than the two other countries (9). The WHO intervened to mediate this potential chal-  
9 lenge, engaging in talks with manufacturers and LMIC governments to secure equitable  
10 access to the vaccine for LMIC (10). Consequently, donation pledges to LMIC were  
11 made by manufacturers and HICs, with the exception of Canada (10, 11). These pledges  
12 from manufacturers were made without a fixed delivery date and were perceived to  
13 leave HICs with more than enough vaccines for full coverage in their own countries,  
14 leaving LMICs with limited access to timely supplies (11).  
15  
16  
17

---

## 18 **Lessons from previous collective responses to support global equitable ac- 19 cess to vaccines**

---

22 In response to the H5N1 and H1N1 experiences, WHO and member states developed  
23 and adopted the Pandemic Influenza Preparedness (PIP) framework in 2011, a global  
24 approach to pandemic influenza preparedness and response (12). The intention of PIP  
25 was to improve and strengthen the sharing of influenza viruses with human pandemic  
26 potential; and to share the benefit of, which is to increase the access of LMICs to vac-  
27 cines and other pandemic related supplies. There are, however, several gaps in the  
28 framework, not least, that it is not legally binding (13).  
29  
30

31 There are other relevant frameworks and mechanisms, such as establishing the Ad-  
32 vanced Market Commitment for AMC for Pneumonia Vaccine, and the Pan Americal  
33 Health Organisation's Revolving Fund for Vaccines. Much can be learnt from these  
34 initiatives that is relevant to the current COVID-19 pandemic. Recent events related to  
35 COVID-19 have shown some countries and technology holders' tendencies to control  
36 the global supply of personal protective equipment, ventilators, diagnostics and thera-  
37 peutic medicines and reserve supply to HIC, as well as the challenges with limited man-  
38 ufacturing capacity and access to know-how, intellectual property and data; indicating  
39 that it is highly likely that similar controls will be placed on a vaccine that meets the  
40 necessary safety, efficacy and regulatory standards, to be used for mass vaccination  
41 (14).  
42  
43

44 To manage anticipated issues with the distribution of COVID-19 vaccine, the WHO is  
45 convening the Access to COVID-19 Tools (ACT) Accelerator, which brings together gov-  
46 ernments, scientists, businesses, civil society, and philanthropists and global health or-  
47 ganizations (the Bill & Melinda Gates Foundation, CEPI, FIND, Gavi, The Global Fund,  
48 Unitaid, Wellcome, the World Bank and Global Financing Facility), in efforts to support  
49 the development and equitable distribution of the tests, treatments and vaccines. The  
50 ACT-Accelerator is organized into four pillars of work: diagnostics, treatment, vaccines  
51 and health system strengthening (15). Gavi and CEPI are leading implementation of the  
52 vaccines pillar, "the COVID-19 vaccine global access (COVAX) facility", which is commit-  
53 ted to supporting the acute phase of the pandemic through the appropriate allocation  
54 of safe and effective doses of a vaccine (16, 17).  
55  
56

57 The barriers in access to medicines to COVID-19 vaccines relate the demand and the  
58 supply of the vaccine, and there continues to be unprecedented demand for a safe and  
59 effective vaccine (18, 19). The supply of this vaccine is hampered by complex vaccine  
60

1 innovation and manufacturing processes. Depending on the candidates that prove to be  
2 the most effective, the approach used will determine the necessary manufacturing ca-  
3 pacity and length of time for development, (19). In terms of the quantity of the vaccine  
4 needed to be produced, this is also influenced by whether one or two does are neces-  
5 sary, in addition other challenges including e.g. with lack or insufficient global vaccine  
6 manufacturing capacity & access to know-how and implementation in LMIC countries  
7 are also essential for access to vaccines for many. All of these factors will limit the sup-  
8 ply of vaccines.  
9

---

## 11 Importance of the project

---

14 The access to, and distribution of a scarce vaccine is one of the pegged solutions to ena-  
15 ble the world to return some semblance of life pre-COVID 19. With COVID-19 affecting  
16 the world, the equitable distribution of this vaccine is important because the virus will  
17 cause unnecessary disability and loss of life unless the benefit of a vaccine is distrib-  
18 uted fairly among and within countries. To our knowledge, a scoping review of the the  
19 factors for the equitable access of a COVID-19 vaccine relevant for LMIC has not been  
20 systematically investigated. The project is considered highly relevant to the current sit-  
21 uation as it aims at identifying and describing of these factors which can inform deci-  
22 sion makers in terms of lessons from previous experiences and supporting the under-  
23 standing of principles related to equitable access to a COVID-19 vaccine, and further  
24 potentially guide implementation of future initiatives to ensure equitable access.  
25  
26  
27  
28

---

## 29 Objective

---

31 This objective of this scoping review is to identify and summarize the factors for the eq-  
32 uitable access of a COVID-19 vaccine relevant for LMICs. We will address the following  
33 question: *What are the factors influencing global equitable access to a COVID-19 vaccine*  
34 *among countries?*  
35  
36  
37  
38  
39  
40  
41  
42  
43  
44  
45  
46  
47  
48  
49  
50  
51  
52  
53  
54  
55  
56  
57  
58  
59  
60

# Methods

## Scoping searches

We will perform systematic scoping searches for publications according to PRISMA-ScR (Preferred Reporting Items for Systematic reviews and Meta-Analyses extension for Scoping Reviews) (20).

### Inclusion criteria

We aim to identify and describe factors influencing global equitable access to a COVID-19 vaccine among countries as identified in our search (see the manuscript supplementary material), following the inclusion criteria shown in Table 1.

Table 1. Inclusion criteria

|                            |                                                                                       |
|----------------------------|---------------------------------------------------------------------------------------|
| <b>Topic</b>               | Pandemic vaccines incl. influenza or COVID-19 vaccine                                 |
| <b>Outcomes</b>            | The factors influencing equitable access to a pandemic vaccine incl. COVID-19 vaccine |
| <b>Type of publication</b> | Primary studies, systematic reviews                                                   |
| <b>Language</b>            | English                                                                               |
| <b>Publication date</b>    | 2002-2021                                                                             |

Restriction to publications from 2002 are made as a pragmatic choice from the date of the 2003-04 SARS pandemic. Furthermore, the limitation to English language journal articles in scientific databases was balancing completeness with the resources available.

### Search strategy and Information sources:

An information specialist at NIPH will develop the search strategies together with the project leader, and another information specialist will review the search strategy. The literature search will be conducted in the following databases: Medline (PubMed and Ovid), EMBASE (Ovid), Global Index Medicus, WHO <https://www.globalindexmedicus.net/> and Web of Science Core Collection Clarivate Analytics (see supplementary information for updated search strategies and databases).

Additional relevant information will be searched from websites of multilateral agencies and international philanthropic agencies identified in the literature through the database search (e.g. WHO Pandemic Influenza Preparedness Framework) as a means to understand the particular framework or initiative.

### Selection of literature

#### First screening

1 We will first review articles that are determined to be relevant (according to prede-  
2 fined inclusion criteria described above). Three project team members (EP, LF and LC)  
3 will independently go through all identified titles and abstracts and determine if arti-  
4 cles should be included for full-text review.  
5  
6

7  
8 Where there are divergent views, inclusion will be determined through discussion and  
9 consensus between the reviewers or by consulting a fourth team member (KF). Rec-  
10 ords not fulfilling the inclusion criteria will be excluded.  
11  
12

### 13 **Full text review**

14 Given time constraints, the review group will divide the studies by two and each study  
15 will be read in full and assessed for inclusion by one reviewer. This is verified by a sec-  
16 ond reviewer. Disagreement over exclusion or inclusion will be handled in the same  
17 way as for the first screening.  
18  
19

### 20 **Extraction and presentation of data**

21 Data to be extracted are mainly qualitative data on the predefined outcomes. Standard  
22 data extraction templates were designed, and piloted specifically for this scoping re-  
23 view (see the manuscript supplementary material for a copy of the data extraction  
24 form).  
25  
26

27  
28 The predefined outcomes for extracting data include: the setting (LMIC or globally fo-  
29 cused or normative guidance that affects LMIC), and argument/ discussion on equity,  
30 access, allocation or prioritization of pandemic vaccines, other aspects that article tells  
31 us about the knowledge in this topic area, challenges in implementing equitable access  
32 to vaccination between countries, and recommendations for strengthening the equita-  
33 ble access to vaccination. In addition, we collected names of relevant global initiatives  
34 and mechanisms as identified in our search. Data is to be extracted by one team mem-  
35 ber and a second reviewer will review the data extraction.  
36  
37  
38  
39

### 40 **Analysis of data**

41 The analysis of the data collected will provide information on the body of research and  
42 evaluations related to the factors influencing global equitable access to a COVID-19 vac-  
43 cine among countries. Our analysis will include how factors influencing global equitable  
44 access to a COVID-19 vaccine among countries pertain to global frameworks and mech-  
45 anisms identified in our searches.  
46  
47  
48

49 We will consider using the following framework for analysis, adapted from Liu et al  
50 (21), which includes three main areas related to:

- 51 - A country's ability to develop or to purchase pandemic vaccines
- 52 - Reciprocity
- 53 - A country's ability to implement or vaccinate.
- 54
- 55
- 56
- 57
- 58
- 59
- 60



---

## Reporting, submission of manuscript and updating of search

---

A draft report based on the findings from the scoping review was prepared and presented to Norad and two external peer reviewers. A manuscript was then prepared and submitted to BMJ Open in January 2021. Based on feedback from peer review, the search was updated in May 2021.

---

## Risk of bias and limitations

---

Due to time constraints we are extracting data directly related to our topic of interest. This will mean that some papers are excluded due to their lack of direct relevance to our question, and will not be included in the analysis.

Only one reviewer will complete the full-text review and data extraction, to limit the risk of bias, one reviewer will peer review the full-text categorisation and data extraction.

---

## Peer –review

---

External and internal peer review is being used to strengthen the methods and improve the rigor of this scoping review.

### Internal:

The project plan (this document) has been reviewed by all authors and peer reviewed internally at NIPH. Internal reviewers at NIPH will also review any publication of results presented to Norad.

### External:

Two external peer reviewers will be used in addition before publication of results.

---

## Acronyms

---

|          |                                                     |
|----------|-----------------------------------------------------|
| CEPI     | Coalition for Epidemic Preparedness Innovations     |
| COVAX    | the COVID-19 vaccine global access (COVAX) facility |
| COVID-19 | 2019 Pandemic corona virus strain                   |
| CIS      | Critical Interpretive Synthesis                     |
| DNA      | Deoxyribonucleic acid                               |
| Gavi     | Gavi, the Vaccine Alliance                          |
| FIND     | the Foundation for Innovative New Diagnostics       |
| HIC      | High income countries                               |
| H1N1     | 2009 influenza A                                    |
| H5N1     | 2006 avian influenza A                              |
| LMIC     | Low- and Middle- income countries                   |

# References

1. Bank TW. The Global Economic Outlook During the COVID-19 Pandemic: A Changed World: The World Bank; 2020 [updated June 8 2020; cited 2020 September 23]. Available from: <https://www.worldbank.org/en/news/feature/2020/06/08/the-global-economic-outlook-during-the-covid-19-pandemic-a-changed-world>.
2. United Nations. A UN framework for the immediate socio-economic response to COVID-19. New York: United Nations; 2020.
3. World Health Organization. Essential medicines and health products. Essential medicines definition 2020 [cited 2020 August 13]. Available from: [https://www.who.int/medicines/services/essmedicines\\_def/en/](https://www.who.int/medicines/services/essmedicines_def/en/).
4. World Health Organization. Access to essential medicines as part of the right to health 2020 [cited 2020 August 13]. Available from: [https://www.who.int/medicines/areas/human\\_rights/en/](https://www.who.int/medicines/areas/human_rights/en/).
5. World Health Organization. Status of COVID-19 Vaccines within WHO Emergency Use Listing / Pre-Qualification 2021 [updated 15 July 2021; cited 2021 24 July]. Available from: <https://www.who.int/emergencies/diseases/novel-coronavirus-2019/covid-19-vaccines>.
6. Bollyky TJ, Gostin LO, Hamburg MA. The equitable distribution of COVID-19 therapeutics and vaccines. *Jama*. 2020.
7. Gopinathan U, Peacocke E, Gouglas D, Ottersen T, Røttingen J-A. R&D for Emerging Infectious Diseases of Epidemic Potential: Sharing Risks and Benefits Through a New Coalition. *Infectious Diseases in the New Millennium*: Springer; 2020. p. 137-65.
8. Fidler DP. Negotiating equitable access to influenza vaccines: global health diplomacy and the controversies surrounding avian influenza H5N1 and pandemic influenza H1N1. *PLoS Med*. 2010;7(5):e1000247.
9. Jefferies N. Levelling the playing field? Sharing of influenza viruses and access to vaccines and other benefits. *Journal of Law and Medicine*. 2012;20(1):59-72.
10. Organization WH. Report of the WHO pandemic influenza A (H1N1) vaccine deployment initiative. 2012.
11. Fidler DP. Negotiating equitable access to influenza vaccines: global health diplomacy and the controversies surrounding avian influenza H5N1 and pandemic influenza H1N1. *Negotiating and Navigating Global Health: Case Studies in Global Health Diplomacy*: World Scientific; 2012. p. 161-72.
12. World Health Organization. Pandemic influenza preparedness framework for the sharing of influenza viruses and access to vaccines and other benefits. 2011.
13. Fidler DP, Gostin LO. The WHO pandemic influenza preparedness framework: A milestone in global governance for health. *JAMA - Journal of the American Medical Association*. 2011;306(2):200-1.
14. Jakes L. U.S. Limits Virus Aid for Masks, Gloves and Other Medical Gear Abroad New York2020 [updated June 9 2020. Available from: <https://www.nytimes.com/2020/06/09/us/politics/coronavirus-international-aid-masks.html>.
15. WHO. The Access to COVID-19 Tools (ACT) Accelerator: WHO; 2020 [cited 2020 August 3]. Available from: <https://www.who.int/initiatives/act-accelerator>.
16. Gavi the Vaccine Alliance. COVAX, the act-accelerator vaccines pillar- Insuring accelerated vaccine development and manufacture: Gavi; 2020 [cited 2020 August 3]. Available from: <https://www.gavi.org/sites/default/files/covid/COVAX-Pillar-background.pdf>.
17. World Health Organization. A global framework to ensure equitable and fair allocation of Covid-19 products. In: WHO, editor. Geneva: WHO; 2020.

- 1 18. Bigdeli M, Jacobs B, Tomson G, Laing R, Ghaffar A, Dujardin B, et al. Access to  
2 medicines from a health system perspective. *Health policy and planning*.  
3 2013;28(7):692-704.
- 4 19. Khamsi R. If a coronavirus vaccine arrives, can the world make enough. *Nature*.  
5 2020 April 9 2020.
- 6 20. Tricco AC, Lillie E, Zarin W, O'Brien KK, Colquhoun H, Levac D, et al. PRISMA  
7 extension for scoping reviews (PRISMA-ScR): checklist and explanation. *Ann Intern*  
8 *Med*. 2018;169(7):467-73.
- 9 21. Liu Y, Salwi S, Drolet BC. Multivalue ethical framework for fair global allocation of  
10 a COVID-19 vaccine. *J Med Ethics*. 2020;46(8):499-501.
- 11
- 12
- 13
- 14
- 15
- 16
- 17
- 18
- 19
- 20
- 21
- 22
- 23
- 24
- 25
- 26
- 27
- 28
- 29
- 30
- 31
- 32
- 33
- 34
- 35
- 36
- 37
- 38
- 39
- 40
- 41
- 42
- 43
- 44
- 45
- 46
- 47
- 48
- 49
- 50
- 51
- 52
- 53
- 54
- 55
- 56
- 57
- 58
- 59
- 60

For peer review only

### Appendix 3: Search strategies for each of the five databases (*Initially searched for the period 01.01.2002 - 28.08.2020, updated to include 12.05.2021*)

#### Databases searched

- MEDLINE ALL 2002 to May 11, 2021
  - o Ovid MEDLINE, PubMed (only 28.08.2020);
  - o Ovid MEDLINE(R) and Epub Ahead of Print, In-Process & Other Non-Indexed Citations and Daily 2002 to August 27, 2020
- Embase 2002 to 2021, Ovid
- Web of Science Core Collection, Clarivate Analytics
- Global Index Medicus, WHO
- COVID-19 Evidence, Epistemonikos Foundation

#### **Updated search 12.05.2021**

We searched:

- **PubMed, US National Library of Medicine (NLM):** [pubmed.ncbi.nlm.nih.gov/](http://pubmed.ncbi.nlm.nih.gov/)  
*Only 28.08.2020 as string was not available in 2021.*

- **MEDLINE ALL 1946 to May 11, 2021, Ovid (searched 12.05.2021)**

| #  | Searches                                                                                                                                          | Results |
|----|---------------------------------------------------------------------------------------------------------------------------------------------------|---------|
| 1  | COVID-19 Vaccines/                                                                                                                                | 2510    |
| 2  | Coronavirus/                                                                                                                                      | 4692    |
| 3  | Betacoronavirus/                                                                                                                                  | 33218   |
| 4  | Coronavirus Infections/                                                                                                                           | 44847   |
| 5  | Coronaviridae Infections/                                                                                                                         | 919     |
| 6  | Severe Acute Respiratory Syndrome/                                                                                                                | 5545    |
| 7  | Pandemics/                                                                                                                                        | 56289   |
| 8  | (COVID-19 or COVID 19 or COVID19 or 2019-nCoV or SARS2 or SARS-CoV or SARS-CoV-2 or SARS-Cov-19 or coronavirus* or corona or pandemic?).ti,ab,kf. | 177584  |
| 9  | (BNT162 or BNT-162 or mRNA-1273 or mRNA1273 or INO-4800 or INO4800 or ChAdOx1 or Ad5-nCoV).ti,ab,kf,hw.                                           | 218     |
| 10 | or/2-9                                                                                                                                            | 184722  |
| 11 | Vaccines/                                                                                                                                         | 22577   |
| 12 | Viral Vaccines/                                                                                                                                   | 27055   |
| 13 | Vaccination/                                                                                                                                      | 85401   |
| 14 | Vaccination Coverage/                                                                                                                             | 1540    |
| 15 | Mass Vaccination/                                                                                                                                 | 3208    |
| 16 | Immunization/                                                                                                                                     | 51563   |
| 17 | Immunization Programs/                                                                                                                            | 11524   |
| 18 | (vaccin* or immuni*).ti,ab,kf.                                                                                                                    | 576919  |
| 19 | or/11-18                                                                                                                                          | 610926  |
| 20 | "Delivery of Health Care"/                                                                                                                        | 95912   |

|    |                                                                                                                                                                                    |         |
|----|------------------------------------------------------------------------------------------------------------------------------------------------------------------------------------|---------|
| 21 | "Health Services Needs and Demand"/                                                                                                                                                | 54005   |
| 22 | Resource Allocation/                                                                                                                                                               | 8895    |
| 23 | Health Care Rationing/                                                                                                                                                             | 11853   |
| 24 | Health Services Accessibility/                                                                                                                                                     | 78488   |
| 25 | Health Equity/                                                                                                                                                                     | 1805    |
| 26 | Right to Health/                                                                                                                                                                   | 131     |
| 27 | Universal Health Care/                                                                                                                                                             | 149     |
| 28 | Healthcare Disparities/                                                                                                                                                            | 18787   |
| 29 | Socioeconomic Factors/                                                                                                                                                             | 162607  |
| 30 | Social Justice/                                                                                                                                                                    | 12551   |
| 31 | Global Health/                                                                                                                                                                     | 50200   |
| 32 | Human Rights/                                                                                                                                                                      | 14729   |
| 33 | ((equit* or equal* or fair* or inequit* or unequal or unfair* or global*) adj3<br>(access* or allocat* or distribut* or deliver* or provision or supply or<br>supplies)).ti,ab,kf. | 32465   |
| 34 | (right to health* or universal health*).ti,ab,kf.                                                                                                                                  | 7779    |
| 35 | ((health* or health care) adj (rationing or disparities)).ti,ab,kf.                                                                                                                | 15193   |
| 36 | or/20-35                                                                                                                                                                           | 488375  |
| 37 | 10 and 19 and 36                                                                                                                                                                   | 1157    |
| 38 | 1 and 36                                                                                                                                                                           | 280     |
| 39 | 37 or 38                                                                                                                                                                           | 1194    |
| 40 | (202008* or 202009* or 202010* or 202011* or 202012* or 2021*).dt,dp,ed,ep,yr.                                                                                                     | 1805737 |
| 41 | 39 and 40                                                                                                                                                                          | 588     |
| 42 | 38 or 41                                                                                                                                                                           | 608     |

• **Embase 1974 to 2021 Week 18 (searched 12.05.2021)**

| # | Searches                                                                                                                                       | Results |
|---|------------------------------------------------------------------------------------------------------------------------------------------------|---------|
| 1 | SARS-CoV-2 vaccine/                                                                                                                            | 2292    |
| 2 | coronavirus disease 2019/                                                                                                                      | 106145  |
| 3 | coronavirinae/                                                                                                                                 | 3003    |
| 4 | betacoronavirus/                                                                                                                               | 7651    |
| 5 | coronavirus infection/                                                                                                                         | 12666   |
| 6 | coronaviridae infection/                                                                                                                       | 187     |
| 7 | pandemic/                                                                                                                                      | 65235   |
| 8 | (COVID-19 or COVID 19 or COVID19 or 2019-nCoV or SARS2 or SARS-CoV or<br>SARS-CoV-2 or SARS-Cov-19 or coronavirus* or corona or pandemic?).mp. | 195467  |

|    |                                                                                                                                                                                 |        |
|----|---------------------------------------------------------------------------------------------------------------------------------------------------------------------------------|--------|
| 9  | (BNT162 or BNT-162 or mRNA-1273 or mRNA1273 or INO-4800 or INO4800 or ChAdOx1 or Ad5-nCoV).mp.                                                                                  | 355    |
| 10 | or/3-9                                                                                                                                                                          | 195821 |
| 11 | vaccine/                                                                                                                                                                        | 63516  |
| 12 | virus vaccine/                                                                                                                                                                  | 20586  |
| 13 | severe acute respiratory syndrome vaccine/                                                                                                                                      | 453    |
| 14 | vaccination/                                                                                                                                                                    | 151179 |
| 15 | vaccination coverage/                                                                                                                                                           | 2788   |
| 16 | immunization/                                                                                                                                                                   | 98822  |
| 17 | mass immunization/                                                                                                                                                              | 3739   |
| 18 | (vaccin* or immuni*).ti,ab,kw,ot.                                                                                                                                               | 685955 |
| 19 | or/11-18                                                                                                                                                                        | 736294 |
| 20 | health care delivery/                                                                                                                                                           | 184159 |
| 21 | resource management/                                                                                                                                                            | 10987  |
| 22 | resource allocation/                                                                                                                                                            | 22438  |
| 23 | health care access/                                                                                                                                                             | 69640  |
| 24 | health care quality/                                                                                                                                                            | 250577 |
| 25 | health equity/                                                                                                                                                                  | 4605   |
| 26 | right to health/                                                                                                                                                                | 214    |
| 27 | universal health care/                                                                                                                                                          | 337    |
| 28 | health care disparity/                                                                                                                                                          | 17595  |
| 29 | socioeconomics/                                                                                                                                                                 | 147326 |
| 30 | social justice/                                                                                                                                                                 | 11121  |
| 31 | global health/                                                                                                                                                                  | 12881  |
| 32 | human rights/                                                                                                                                                                   | 26721  |
| 33 | ((equit* or equal* or fair* or inequit* or unequal or unfair* or global*) adj3 (access* or allocat* or distribut* or deliver* or provision or supply or supplies)).ti,ab,kw,ot. | 42137  |
| 34 | (right to health* or universal health*).ti,ab,kw,ot.                                                                                                                            | 9211   |
| 35 | ((health* or health care) adj (rationing or disparities)).ti,ab,kw,ot.                                                                                                          | 19032  |
| 36 | or/20-35                                                                                                                                                                        | 714178 |
| 37 | 10 and 19 and 36                                                                                                                                                                | 1372   |
| 38 | 1 and 36                                                                                                                                                                        | 266    |
| 39 | 2 and 19 and 36                                                                                                                                                                 | 692    |
| 40 | or/37-39                                                                                                                                                                        | 1423   |
| 41 | limit 40 to (conference abstracts or embase)                                                                                                                                    | 1129   |
| 42 | limit 37 to (conference abstracts or embase)                                                                                                                                    | 1078   |

|    |                                                                          |         |
|----|--------------------------------------------------------------------------|---------|
| 43 | (202008* or 202009* or 202010* or 202011* or 202012* or 2021*).dd,em,yr. | 1850404 |
| 44 | 42 and 43                                                                | 439     |
| 45 | limit 38 to (conference abstracts or embase)                             | 259     |
| 46 | limit 39 to (conference abstracts or embase)                             | 652     |
| 47 | 44 or 45 or 46                                                           | 751     |
| 48 | 47 use oemez                                                             | 751     |

- **Web of Science, Clarivate Analytics** (searched 12.05.2021)

Advanced search - Topic

COVID-19 OR "COVID 19" OR COVID19 OR 2019-nCoV OR "2019 nCoV" OR SARS2 OR SARS-CoV OR "SARS CoV" OR SARS-CoV-2 OR "SARS CoV 2" OR SARS-Cov-19 OR "SARS Cov 19" OR coronavirus OR corona OR pandemic OR pandemics

AND

vaccin\* OR immuni\*

AND

equity OR equitable OR equal OR equally OR inequity OR inequitable OR unequal OR unequally OR fair\* OR unfair\* OR "right to health" OR "right to healthcare" OR "universal health" OR "universal healthcare" OR "healthcare rationing" OR "health care rationing" OR "healthcare disparity" OR "healthcare disparity" OR "healthcare disparities" OR "healthcare disparities"

- **Global Index Medicus, WHO:** [www.globalindexmedicus.net](http://www.globalindexmedicus.net) (searched 14.05.2021)

Advanced search in Title, abstract, subject

COVID-19 OR "COVID 19" OR COVID19 OR 2019-nCoV OR "2019 nCoV" OR SARS2 OR SARS-CoV OR "SARS CoV" OR SARS-CoV-2 OR "SARS CoV 2" OR SARS-Cov-19 OR "SARS Cov 19" OR coronavirus OR corona OR pandemic OR pandemics

AND

vaccine OR vaccines OR vaccination OR immunization OR immunisation

AND

equity OR equitable OR equal OR equally OR inequity OR inequitable OR unequal OR unequally OR fair\* OR unfair\* OR "right to health" OR "right to healthcare" OR "universal health" OR "universal healthcare" OR "healthcare rationing" OR "health care rationing" OR "healthcare disparity" OR "healthcare disparity" OR "healthcare disparities" OR "healthcare disparities" OR global OR globally

- **COVID-19 Evidence, Epistemonikos Foundation:**

[app.iloveevidence.com/loves/5e6fdb9669c00e4ac072701d?utm=epdb\\_en](http://app.iloveevidence.com/loves/5e6fdb9669c00e4ac072701d?utm=epdb_en) (searched 14.05.2021)

(vaccin\* OR immuniz\* OR immuni\*) AND (equity OR equitable OR equal OR equally OR inequity OR inequitable OR unequal OR unequally OR fair\* OR unfair\* OR "right to health" OR "right to healthcare" OR "universal health" OR "universal healthcare" OR "healthcare rationing" OR "health care rationing" OR "healthcare disparity" OR "healthcare disparity" OR "healthcare disparities" OR "healthcare disparities" OR global OR globally) AND (access\* or allocat\* or distribut\* or deliver\* or provision or supply or supplies)

LIMITED TO Type of publication: Pre-print

### Original search of databases: 28.08.2020

- MEDLINE, PubMed (searched 28.08.2020)

MeSH: "COVID-19 vaccine" [Supplementary Concept]

**Ovid MEDLINE(R) and Epub Ahead of Print, In-Process & Other Non-Indexed Citations and Daily 1946 to August 27, 2020** (searched 28.08.2020)

| #  | Searches                                                                                                                                          | Results |
|----|---------------------------------------------------------------------------------------------------------------------------------------------------|---------|
| 1  | Coronavirus/                                                                                                                                      | 3244    |
| 2  | Betacoronavirus/                                                                                                                                  | 16530   |
| 3  | Coronavirus Infections/                                                                                                                           | 24138   |
| 4  | Coronaviridae Infections/                                                                                                                         | 906     |
| 5  | Severe Acute Respiratory Syndrome/                                                                                                                | 4873    |
| 6  | Pandemics/                                                                                                                                        | 24349   |
| 7  | (COVID-19 or COVID 19 or COVID19 or 2019-nCoV or SARS2 or SARS-CoV or SARS-CoV-2 or SARS-Cov-19 or coronavirus* or corona or pandemic?).ti,ab,kf. | 91205   |
| 8  | (BNT162 or BNT-162 or mRNA-1273 or mRNA1273 or INO-4800 or INO4800 or ChAdOx1 or Ad5-nCoV).ti,ab,kf,hw.                                           | 51      |
| 9  | or/1-8                                                                                                                                            | 97109   |
| 10 | Vaccines/                                                                                                                                         | 21690   |
| 11 | Viral Vaccines/                                                                                                                                   | 25884   |
| 12 | Vaccination/                                                                                                                                      | 81687   |
| 13 | Vaccination Coverage/                                                                                                                             | 1160    |
| 14 | Mass Vaccination/                                                                                                                                 | 3038    |
| 15 | Immunization/                                                                                                                                     | 50752   |
| 16 | Immunization Programs/                                                                                                                            | 10877   |
| 17 | (vaccin* or immuni*).ti,ab,kf.                                                                                                                    | 546309  |
| 18 | or/10-17                                                                                                                                          | 579947  |
| 19 | "Delivery of Health Care"/                                                                                                                        | 91173   |
| 20 | "Health Services Needs and Demand"/                                                                                                               | 53044   |
| 21 | Resource Allocation/                                                                                                                              | 8501    |
| 22 | Health Care Rationing/                                                                                                                            | 11514   |
| 23 | Health Services Accessibility/                                                                                                                    | 74764   |
| 24 | Health Equity/                                                                                                                                    | 1291    |
| 25 | Right to Health/                                                                                                                                  | 75      |
| 26 | Universal Health Care/                                                                                                                            | 80      |
| 27 | Healthcare Disparities/                                                                                                                           | 17030   |
| 28 | Socioeconomic Factors/                                                                                                                            | 157123  |
| 29 | Social Justice/                                                                                                                                   | 12160   |
| 30 | Global Health/                                                                                                                                    | 47402   |
| 31 | Human Rights/                                                                                                                                     | 14384   |



|    |                                                                                                                                                                              |        |
|----|------------------------------------------------------------------------------------------------------------------------------------------------------------------------------|--------|
| 32 | ((equit* or equal* or fair* or inequit* or unequal or unfair* or global*) adj3 (access* or allocat* or distribut* or deliver* or provision or supply or supplies)).ti,ab,kf. | 29976  |
| 33 | (right to health* or universal health*).ti,ab,kf.                                                                                                                            | 7053   |
| 34 | ((health* or health care) adj (rationing or disparities)).ti,ab,kf.                                                                                                          | 13345  |
| 35 | or/19-34                                                                                                                                                                     | 466021 |
| 36 | 9 and 18 and 35                                                                                                                                                              | 632    |

• **Embase 1974 to 2020 Week 34, Ovid (searched 28.08.2020)**

| #  | Searches                                                                                                                                                                        | Results |
|----|---------------------------------------------------------------------------------------------------------------------------------------------------------------------------------|---------|
| 1  | coronavirinae/                                                                                                                                                                  | 2268    |
| 2  | betacoronavirus/                                                                                                                                                                | 4632    |
| 3  | coronavirus infection/                                                                                                                                                          | 8485    |
| 4  | coronaviridae infection/                                                                                                                                                        | 166     |
| 5  | pandemic/                                                                                                                                                                       | 30028   |
| 6  | (COVID-19 or COVID 19 or COVID19 or 2019-nCoV or SARS2 or SARS-CoV or SARS-CoV-2 or SARS-Cov-19 or coronavirus* or corona or pandemic?).mp.                                     | 103695  |
| 7  | (BNT162 or BNT-162 or mRNA-1273 or mRNA1273 or INO-4800 or INO4800 or ChAdOx1 or Ad5-nCoV).mp.                                                                                  | 85      |
| 8  | or/1-7                                                                                                                                                                          | 103962  |
| 9  | vaccine/                                                                                                                                                                        | 60026   |
| 10 | virus vaccine/                                                                                                                                                                  | 19609   |
| 11 | severe acute respiratory syndrome vaccine/                                                                                                                                      | 385     |
| 12 | vaccination/                                                                                                                                                                    | 140276  |
| 13 | vaccination coverage/                                                                                                                                                           | 2060    |
| 14 | immunization/                                                                                                                                                                   | 94131   |
| 15 | mass immunization/                                                                                                                                                              | 3511    |
| 16 | (vaccin* or immuni*).ti,ab,kw,ot.                                                                                                                                               | 643022  |
| 17 | or/9-16                                                                                                                                                                         | 689815  |
| 18 | health care delivery/                                                                                                                                                           | 174154  |
| 19 | resource management/                                                                                                                                                            | 10271   |
| 20 | resource allocation/                                                                                                                                                            | 20867   |
| 21 | health care access/                                                                                                                                                             | 62445   |
| 22 | health care quality/                                                                                                                                                            | 241073  |
| 23 | health equity/                                                                                                                                                                  | 3269    |
| 24 | right to health/                                                                                                                                                                | 105     |
| 25 | universal health care/                                                                                                                                                          | 155     |
| 26 | health care disparity/                                                                                                                                                          | 15646   |
| 27 | socioeconomics/                                                                                                                                                                 | 140163  |
| 28 | social justice/                                                                                                                                                                 | 10427   |
| 29 | global health/                                                                                                                                                                  | 9804    |
| 30 | human rights/                                                                                                                                                                   | 24894   |
| 31 | ((equit* or equal* or fair* or inequit* or unequal or unfair* or global*) adj3 (access* or allocat* or distribut* or deliver* or provision or supply or supplies)).ti,ab,kw,ot. | 38602   |
| 32 | (right to health* or universal health*).ti,ab,kw,ot.                                                                                                                            | 8082    |
| 33 | ((health* or health care) adj (rationing or disparities)).ti,ab,kw,ot.                                                                                                          | 16415   |
| 34 | or/18-33                                                                                                                                                                        | 670545  |
| 35 | 8 and 17 and 34                                                                                                                                                                 | 672     |
| 36 | limit 35 to (conference abstracts or embase)                                                                                                                                    | 529     |

1  
2  
3  
4  
5  
6  
7  
8  
9  
10  
11  
12  
13  
14  
15  
16  
17  
18  
19  
20  
21  
22  
23  
24  
25  
26  
27  
28  
29  
30  
31  
32  
33  
34  
35  
36  
37  
38  
39  
40  
41  
42  
43  
44  
45  
46  
47  
48  
49  
50  
51  
52  
53  
54  
55  
56  
57  
58  
59  
60

- **Global Index Medicus, WHO** (searched 28.08.2020)

Advanced search in Title, abstract, subject

COVID-19 OR "COVID 19" OR COVID19 OR 2019-nCoV OR "2019 nCoV" OR SARS2 OR SARS-CoV OR "SARS CoV" OR SARS-CoV-2 OR "SARS CoV 2" OR SARS-Cov-19 OR "SARS Cov 19" OR coronavirus OR corona OR pandemic OR pandemics

AND

vaccine OR vaccines OR vaccination OR immunization OR immunisation

AND

equity OR equitable OR equal OR equally OR inequity OR inequitable OR unequal OR unequally OR unfair OR unfairly OR disparity OR disparities OR global OR globally

- **Web of Science, Clarivate Analytics** (searched 28.08.2020)

COVID-19 OR "COVID 19" OR COVID19 OR 2019-nCoV OR "2019 nCoV" OR SARS2 OR SARS-CoV OR "SARS CoV" OR SARS-CoV-2 OR "SARS CoV 2" OR SARS-Cov-19 OR "SARS Cov 19" OR coronavirus OR corona OR pandemic OR pandemics

AND

vaccin\* OR immuni\*

AND

equity OR equitable OR equal OR equally OR inequity OR inequitable OR unequal OR unequally OR unfair OR unfairly OR "right to health" OR "right to healthcare" OR "universal health" OR "universal healthcare" OR "healthcare rationing" OR "health care rationing" OR "healthcare disparity" OR "healthcare disparity" OR "healthcare disparities" OR "healthcare disparities"

#### Appendix 4: Excluded articles and reason for exclusion

**Reason for exclusion key:** 1: mentions issue but lacks detail or did not add new insight to factors related to equitable access, 2: discusses within, not amongst countries, 3: irrelevant, 4: not English, 5: full-text unavailable, 6: not in peer reviewed journal.

| Nr* | First author, year  | Title                                                                                                                                                                                 | Reason excluded |
|-----|---------------------|---------------------------------------------------------------------------------------------------------------------------------------------------------------------------------------|-----------------|
| 1   | Acharya, 2021       | Access to and equitable distribution of COVID-19 vaccine in low-income countries                                                                                                      | 1               |
| 2   | Anonymous, 2021     | Why a pioneering plan to distribute COVID vaccines equitably must succeed                                                                                                             | 1               |
| 3   | Anonymous, 2021     | It's time to consider a patent reprieve for COVID vaccines                                                                                                                            | 1               |
| 4   | Aryeetey, 2021      | A step backwards in the fight against global vaccine inequities                                                                                                                       | 1               |
| 5   | Bennett, 2010       | Law, ethics and pandemic preparedness: the importance of cross-jurisdictional and cross-cultural perspectives                                                                         | 1               |
| 6   | Binagwaho, 2021     | Equitable and Effective Distribution of the COVID-19 Vaccines - A Scientific and Moral Obligation                                                                                     | 1               |
| 7   | Burki, 2021         | Equitable distribution of COVID-19 vaccines                                                                                                                                           | 1               |
| 8   | Burki, 2021         | Challenges in the rollout of COVID-19 vaccines worldwide                                                                                                                              | 1               |
| 9   | Cohen, 2021         | As vaccines emerge, a global waiting game begins                                                                                                                                      | 1               |
| 10  | Emanuel, 2020       | An ethical framework for global vaccine allocation                                                                                                                                    | 1               |
| 11  | Ferguson, 2020      | Love thy neighbour? Allocating vaccines in a world of competing obligations                                                                                                           | 1               |
| 12  | Fisher, 2011        | Pandemic response lessons from influenza H1N1 2009 in Asia                                                                                                                            | 1               |
| 13  | Friede, 2011        | WHO initiative to increase global and equitable access to influenza vaccine in the event of a pandemic: supporting developing country production capacity through technology transfer | 1               |
| 14  | Garfinkel, 2020     | Survival of the Wealthiest?                                                                                                                                                           | 1               |
| 15  | Gostin, 2020        | Facilitating Access to a COVID-19 Vaccine through Global Health Law                                                                                                                   | 1               |
| 16  | Haaheim, 2009       | Pandemic influenza vaccines - the challenges                                                                                                                                          | 1               |
| 17  | Hay, 2018           | The WHO global influenza surveillance and response system (GISRS)-A future perspective                                                                                                | 1               |
| 18  | Herzog, 2021        | Covax must go beyond proportional allocation of covid vaccines to ensure fair and equitable access                                                                                    | 1               |
| 19  | Hessel, 2009        | Pandemic influenza vaccines: Meeting the supply, distribution and deployment challenges                                                                                               | 1               |
| 20  | Ho, 2020            | Global Disparity and Solidarity in a Pandemic                                                                                                                                         | 1               |
| 21  | Hurley, 2021        | It's self-interest to share our vaccines globally                                                                                                                                     | 1               |
| 22  | Kamradt-Scott, 2012 | Evidence-based medicine and the governance of pandemic influenza                                                                                                                      | 1               |
| 23  | Kim, 2021           | Operation Warp Speed: implications for global vaccine security                                                                                                                        | 1               |
| 24  | Kimble, 2021        | Considerations on the distribution and administration of the new COVID-19 vaccines                                                                                                    | 1               |
| 25  | Kupferschmidt, 2020 | Despite obstacles, WHO unveils plan to distribute vaccine                                                                                                                             | 1               |
| 26  | Lie, n.d.           | Allocating a COVID-19 Vaccine: Balancing National and International Responsibilities                                                                                                  | 1               |
| 27  | Lomazzi, 2020       | Equitable access to COVID-19 vaccination: a distant dream?                                                                                                                            | 1               |
| 28  | Megidido, 2020      | Fairer financing of vaccines in a world living with COVID-19                                                                                                                          | 1               |
| 29  | Meyer, 2020         | After a COVID-19 vaccine: Collaboration or competition?                                                                                                                               | 1               |
| 30  | Milstien, 2003      | Emergency response vaccines: Lessons learned in response to communicable diseases                                                                                                     | 1               |
| 31  | Munguia-Lopez, 2021 | Fair Allocation of Potential COVID-19 Vaccines Using an Optimization-Based Strategy                                                                                                   | 1               |
| 32  | Nannei, 2016        | Stakeholders' perceptions of 10years of the Global Action Plan for Influenza Vaccines (GAP) - Results from a survey                                                                   | 1               |

|    |                        |                                                                                                                                                              |   |
|----|------------------------|--------------------------------------------------------------------------------------------------------------------------------------------------------------|---|
| 33 | Nazar, 2020            | All for vaccine, vaccine for all                                                                                                                             | 1 |
| 34 | Nkengasong, 2020       | COVID-19 vaccines: how to ensure Africa has access                                                                                                           | 1 |
| 35 | Ogbogu, 2020           | Bioethics and practical justice in the post-COVID-19 era                                                                                                     | 1 |
| 36 | Orit Fischman, 2021    | A Global Pandemic Remedy to Vaccine Nationalism                                                                                                              | 1 |
| 37 | Punjabi, 2021          | Vaccine is health and health is wealth                                                                                                                       | 1 |
| 38 | Rodríguez Mega, 2020   | Latin American scientists join the coronavirus vaccine race: 'No one's coming to rescue us'                                                                  | 1 |
| 39 | Ropero-Alvarez, 2012   | Pandemic influenza vaccination: lessons learned from Latin America and the Caribbean                                                                         | 1 |
| 40 | Sadeghi, 2021          | The commitment for fair distribution of COVID-19 vaccine among all countries of the world.                                                                   | 1 |
| 41 | Schwartz, 2009         | Prioritization of pandemic influenza vaccine: Rationale and strategy for decision making                                                                     | 1 |
| 42 | Schwartz, 2020         | Equitable global access to coronavirus disease 2019 vaccines                                                                                                 | 1 |
| 43 | Sharun, 2021           | COVID-19 vaccine diplomacy and equitable access to vaccines amid ongoing pandemic                                                                            | 1 |
| 44 | The Lancet, 2020       | Global collaboration for health: rhetoric versus reality                                                                                                     | 1 |
| 45 | Usman, 2020            | After the Coronavirus Vaccine's Discovery: Concerns Regarding a COVID-19 Vaccination's Distribution                                                          | 1 |
| 46 | Yamada, 2009           | Poverty, wealth, and access to pandemic influenza vaccines                                                                                                   | 1 |
| 47 | Yen, 2015              | The development of global vaccine stockpiles                                                                                                                 | 1 |
| 48 | Zimmerman, 2007        | Rationing of influenza vaccine during a pandemic: ethical analyses                                                                                           | 1 |
| 49 | Abramowitz, 2020       | Transparent, equitable, safe, and effective use of COVID-19 vaccines: A societal imperative                                                                  | 2 |
| 50 | Adebambo Anthony, 2020 | Intellectual Property Rights, Pharmaceutical Patents and Public Health: Adopting Compulsory and Government Use Licenses in the COVID-19 Emergency in Nigeria | 2 |
| 51 | Ana Santos, 2020       | Comments on the Preliminary Framework for Equitable Allocation of COVID-19 Vaccine                                                                           | 2 |
| 52 | Anonymous, 2020        | ASHP principles for COVID-19 vaccine distribution, allocation, and mass immunization                                                                         | 2 |
| 53 | Ayers, 2021            | Disparities in H1N1 Vaccination Rates: a Systematic Review and Evidence Synthesis to Inform COVID-19 Vaccination Efforts                                     | 2 |
| 54 | Bell, 2018             | Preparedness for influenza vaccination during a pandemic in the World Health Organization Western Pacific Region                                             | 2 |
| 55 | Cerilles, n.d.         | Analysing the interplay between the right to health and pharmaceutical patent rights in the introduction of a COVID-19 vaccine into the Philippines          | 2 |
| 56 | Edwards, 2009          | Strategies for broad global access to pandemic influenza vaccines                                                                                            | 2 |
| 57 | Hadler, 2005           | Public health strategies for distribution of influenza vaccine during an influenza pandemic                                                                  | 2 |
| 58 | Lee, 2021              | Last-Mile Logistics of Covid Vaccination - The Role of Health Care Organizations                                                                             | 2 |
| 59 | Looi, 2021             | Jeremy Farrar: Make vaccine available to other countries as soon as our most vulnerable people have received it                                              | 2 |
| 60 | Martin, 2021           | Maintaining a Focus on Health Equity During the COVID-19 Vaccine Rollout                                                                                     | 2 |
| 61 | Medina-Walpole, 2021   | What It Will Take to Equitably Distribute a COVID-19 Vaccine                                                                                                 | 2 |
| 62 | Muula, 2007            | How relevant is Bellagio statement of principles on social justice and influenza to Africa?                                                                  | 2 |
| 63 | Subbaraman, 2020       | Who gets a COVID vaccine first? Access plans are taking shape                                                                                                | 2 |
| 64 | Todd, 2021             | Learning from past mistakes? The COVID-19 vaccine and the inverse equity hypothesis                                                                          | 2 |
| 65 | Varshney, 2021         | Vaccine diplomacy: Exploring the benefits of international collaboration                                                                                     | 2 |
| 66 | Adar, 2020             | Distribution equality as an optimal epidemic mitigation strategy                                                                                             | 3 |
| 67 | Alaran, 2021           | Uneven power dynamics must be levelled in COVID-19 vaccines access and distribution                                                                          | 3 |

|     |                                  |                                                                                                                                                                            |   |
|-----|----------------------------------|----------------------------------------------------------------------------------------------------------------------------------------------------------------------------|---|
| 68  | AlKhalidi, 2021                  | Rethinking and strengthening the Global Health Diplomacy through triangulated nexus between policy makers, scientists and the community in light of COVID-19 global crisis | 3 |
| 69  | Al-Oraibi, 2021                  | Migrant health is public health: a call for equitable access to COVID-19 vaccines                                                                                          | 3 |
| 70  | Anderson, 2020                   | Intensifying vaccine production                                                                                                                                            | 3 |
| 71  | Anonymous, 2021                  | COVID-19 Vaccine: Development, Testing, and Distribution                                                                                                                   | 3 |
| 72  | Bartovic, 2021                   | Ensuring equitable access to vaccines for refugees and migrants during the COVID-19 pandemic                                                                               | 3 |
| 73  | Bhatia, 2013                     | The H1N1 influenza pandemic: need for solutions to ethical problems                                                                                                        | 3 |
| 74  | Billington, 2020                 | Developing Vaccines for SARS-CoV-2 and Future Epidemics and Pandemics: Applying Lessons from Past Outbreaks                                                                | 3 |
| 75  | Boulton, 2021                    | Advancing Global Vaccination Equity                                                                                                                                        | 3 |
| 76  | Boum Ii, 2021                    | How to ensure a needs-driven and community-centred vaccination strategy for COVID-19 in Africa                                                                             | 3 |
| 77  | Briand, 2010                     | Future developments in global influenza surveillance                                                                                                                       | 3 |
| 78  | Bryan, 2021                      | WTO Waiver from Intellectual Property Protection for COVID-19 Vaccines and Treatments: A Critical Review                                                                   | 3 |
| 79  | Cheong, 2020                     | Unequal Access to Vaccines Will Exacerbate Other Inequalities                                                                                                              | 3 |
| 80  | Coleman, 2009                    | Allocating vaccines and antiviral medications during an influenza pandemic                                                                                                 | 3 |
| 81  | Commissioners, 2021              | Human rights and fair access to COVID-19 vaccines: the International AIDS Society-Lancet Commission on Health and Human Rights                                             | 3 |
| 82  | Dadari, 2021                     | Pro-equity immunization and health systems strengthening strategies in select Gavi-supported countries                                                                     | 3 |
| 83  | Elbe, 2010                       | Haggling over viruses: the downside risks of securitizing infectious disease                                                                                               | 3 |
| 84  | Eurosurveillance editorial, 2011 | Agreement on a pandemic influenza preparedness framework for the sharing of viruses and benefit sharing                                                                    | 3 |
| 85  | Fedson, 2006                     | Vaccine development for an imminent pandemic: why we should worry, what we must do                                                                                         | 3 |
| 86  | Gladas, 2021                     | Supporting efforts for a global COVID-19 vaccine                                                                                                                           | 3 |
| 87  | Goh, 2021                        | Covid-19 vaccination: the dangers of "values" imperialism                                                                                                                  | 3 |
| 88  | Gostin, 2006                     | Medical countermeasures for pandemic influenza: ethics and the law                                                                                                         | 3 |
| 89  | Griffin, 2020                    | Covid-19: Governments should demand transparency on vaccine deals, says MSF                                                                                                | 3 |
| 90  | Gronvall, 2006                   | Removing barriers to global pandemic influenza vaccination                                                                                                                 | 3 |
| 91  | Guerin, 2020                     | The consequence of COVID-19 on the global supply of medical products: Why Indian generics matter for the world?                                                            | 3 |
| 92  | Gurwitz, 2021                    | Ethical tradeoffs in SARS-CoV-2 vaccine development: Assuring fair availability for low-income countries                                                                   | 3 |
| 93  | Haaheim, 2007                    | Vaccines for an influenza pandemic: scientific and political challenges                                                                                                    | 3 |
| 94  | Halabi, 2020                     | No-Fault Compensation for Vaccine Injury - The Other Side of Equitable Access to Covid-19 Vaccines                                                                         | 3 |
| 95  | Hendriks, 2011                   | An international technology platform for influenza vaccines                                                                                                                | 3 |
| 96  | Henn, 2020                       | Allocation criteria for an initial shortage of a future SARS-CoV-2 vaccine and necessary measures for global immunity                                                      | 3 |
| 97  | Huneycutt, 2020                  | Finding equipoise: CEPI revises its equitable access policy                                                                                                                | 3 |
| 98  | Jecker, 2021                     | Out of Africa: A Solidarity-Based Approach to Vaccine Allocation                                                                                                           | 3 |
| 99  | Jecker, 2021                     | Vaccine ethics: an ethical framework for global distribution of COVID-19 vaccines                                                                                          | 3 |
| 100 | Kamradt-Scott, 2013              | The politics of medicine and the global governance of pandemic influenza                                                                                                   | 3 |
| 101 | Karim, 2020                      | COVID-19 vaccine affordability and accessibility                                                                                                                           | 3 |
| 102 | Katz, 2021                       | From Vaccine Nationalism to Vaccine Equity - Finding a Path Forward                                                                                                        | 3 |
| 103 | Kelley, 2020                     | An appeal for practical social justice in the COVID-19 global response in low-income and middle-income countries                                                           | 3 |

|     |                  |                                                                                                                                                      |   |
|-----|------------------|------------------------------------------------------------------------------------------------------------------------------------------------------|---|
| 104 | Kelley, 2021     | Process and operations strategies to enable global access to antibody therapies                                                                      | 3 |
| 105 | Khamisi, 2020    | If a coronavirus vaccine arrives, can the world make enough?                                                                                         | 3 |
| 106 | Kieny, 2009      | WHO supports fair access to influenza A (H1N1) vaccine                                                                                               | 3 |
| 107 | Koff, 2021       | A universal coronavirus vaccine                                                                                                                      | 3 |
| 108 | Kyd, 2010        | 3rd Global Vaccine Congress                                                                                                                          | 3 |
| 109 | Lee, 2011        | The Benefits To All Of Ensuring Equal And Timely Access To Influenza Vaccines In Poor Communities                                                    | 3 |
| 110 | Li, 2010         | Healthcare system cost evaluation of antiviral stockpiling for pandemic influenza preparedness                                                       | 3 |
| 111 | McLachlan, 2012  | A proposed non-consequentialist policy for the ethical distribution of scarce vaccination in the face of an influenza pandemic                       | 3 |
| 112 | McLachlan, 2015  | On the random distribution of scarce doses of vaccine in response to the threat of an influenza pandemic: a response to Wardrope                     | 3 |
| 113 | Monto, 2011      | Response to the 2009 pandemic: effect on influenza control in wealthy and poor countries                                                             | 3 |
| 114 | Mukherjee, 2020  | Global efforts on vaccines for COVID-19: Since, sooner or later, we all will catch the coronavirus                                                   | 3 |
| 115 | Nguyen, 2010     | The influenza challenge                                                                                                                              | 3 |
| 116 | Pagliusi, 2018   | Vaccines, inspiring innovation in health                                                                                                             | 3 |
| 117 | Palkonyay, 2016  | A decade of adaptation: Regulatory contributions of the World Health Organization to the Global Action Plan for Influenza Vaccines (2006-2016)       | 3 |
| 118 | Peters, 2021     | Ensuring vaccine supply meets global needs                                                                                                           | 3 |
| 119 | Rastegar, 2021   | An inventory-location optimization model for equitable influenza vaccine distribution in developing countries during the COVID-19 pandemic           | 3 |
| 120 | Roope, 2020      | How Should a Safe and Effective COVID-19 Vaccine be Allocated? Health Economists Need to be Ready to Take the Baton                                  | 3 |
| 121 | Ruscio, 2020     | Shaping meeting to explore the value of a coordinated work plan for epidemic and pandemic influenza vaccine preparedness                             | 3 |
| 122 | Sabri, 2020      | Solidarity in the time of covid-19 pandemic                                                                                                          | 3 |
| 123 | Saunders, 2018   | EQUALITY IN THE ALLOCATION OF SCARCE VACCINES                                                                                                        | 3 |
| 124 | Shretta, 2021    | Vaccinating the world against COVID-19: getting the delivery right is the greatest challenge                                                         | 3 |
| 125 | Smith, 2021      | Top five ethical lessons of COVID-19 that the world must learn                                                                                       | 3 |
| 126 | Snyder, 2020     | Designing Pull Funding For A COVID-19 Vaccine                                                                                                        | 3 |
| 127 | Stohr, 2006      | Influenza pandemic vaccines: How to ensure a low-cost, low-dose option                                                                               | 3 |
| 128 | Stoto, 2013      | Lessons about the state and local public health system response to the 2009 H1N1 pandemic: a workshop summary                                        | 3 |
| 129 | Straetmans, 2007 | Prioritization strategies for pandemic influenza vaccine in 27 countries of the European Union and the Global Health Security Action Group: a review | 3 |
| 130 | Tatar, 2021      | The Role of Good Governance in the Race for Global Vaccination during the COVID-19 Pandemic                                                          | 3 |
| 131 | Wardrope, 2012   | Scarce vaccine supplies in an influenza pandemic should not be distributed randomly: reply to McLachlan                                              | 3 |
| 132 | Wong, 2018       | Funding vaccines for emerging infectious diseases                                                                                                    | 3 |
| 133 | Wynia, 2006      | Ethics and public health emergencies: rationing vaccines                                                                                             | 3 |
| 134 | Yau, n.d.        | Mapping the inequality of the global distribution of seasonal influenza vaccine                                                                      | 3 |
| 135 | Zard, n.d.       | Leave no one behind: ensuring access to COVID-19 vaccines for refugee and displaced populations                                                      | 3 |
| 136 | Aranzazu, 2013   | The WHO influenza surveillance network. Modes of circulation of viruses strains, knowledge and technologies, 1947-2007                               | 4 |

|     |                                                               |                                                                                                                                                                    |   |
|-----|---------------------------------------------------------------|--------------------------------------------------------------------------------------------------------------------------------------------------------------------|---|
| 137 | Bingzhe, 2020                                                 | Expanding the pandemic influenza preparedness framework to the epidemic of COVID-19                                                                                | 4 |
| 138 | Leineweber, 2021                                              | The influence of the U.S. response to COVID-19 in Global Health                                                                                                    | 4 |
| 139 | Collin, 2009                                                  | [Influenza vaccine: globalization of public health stakes]                                                                                                         | 5 |
| 140 | Donatelli, 2003                                               | [WHO Influenza Global Agenda]                                                                                                                                      | 5 |
| 141 | Iacob, 2020                                                   | The Role of the Joint Procurement Agreement during the COVID-19 Pandemic: Assessing Its Usefulness and Discussing Its Potential to Support a European Health Union | 5 |
| 142 | Jorgensen, 2013                                               | Unequal access to vaccines in the WHO European Region during the A(H1N1) influenza pandemic in 2009                                                                | 5 |
| 143 | Lopalco, 2016                                                 | Pandemic vaccines: Are we prepared for the next pandemic?                                                                                                          | 5 |
| 144 | Mark, 2020                                                    | The Procurement of a COVID-19 Vaccine in Developing Countries: Lessons from the 2009-H1N1 Pandemic                                                                 | 5 |
| 145 | Mendes, 2021                                                  | Tackling inequitable distribution of the COVID-19 vaccine                                                                                                          | 5 |
| 146 | Saransh, 2021                                                 | Building Resilient Vaccine Distribution                                                                                                                            | 5 |
| 147 | Ana Santos, 2020                                              | The COVID-19 Vaccine Race: Intellectual Property, Collaboration(s), Nationalism and Misinformation                                                                 | 6 |
| 148 | Ana Santos, 2020                                              | The Reemergence of Vaccine Nationalism                                                                                                                             | 6 |
| 149 | Ana Santos, 2020                                              | The Intellectual Property of COVID-19                                                                                                                              | 6 |
| 150 | Armin von, 2020                                               | The Role of International Law in Vaccinating Against COVID-19: Appraising the COVAX Initiative                                                                     | 6 |
| 151 | Benjamin, 2020                                                | COVID-19 Vaccine Research, Development, Regulation and Access                                                                                                      | 6 |
| 152 | François, 2020                                                | Spatial Allocation of Scarce Vaccine and Antivirals for COVID-19                                                                                                   | 6 |
| 153 | Goldstein, 2021                                               | Failure to achieve global vaccine equity will have dire consequences                                                                                               | 6 |
| 154 | Jorge, 2021                                                   | US Support for a WTO Waiver of COVID-19 Intellectual Property – What Does it Mean?                                                                                 | 6 |
| 155 | Mohamed Mustafa, 2021                                         | The Cost of Procuring and Delivering COVID-19 Vaccines in Low- and Middle-Income Countries: A Model of Projected Resource Needs                                    | 6 |
| 156 | National Academies of Sciences Engineering and Medicine, 2020 | Framework for Equitable Allocation of COVID-19 Vaccine                                                                                                             | 6 |
| 157 | Shlomit, 2021                                                 | Intellectual Property Laws in the Digital Era: An International Distributive Justice Perspective                                                                   | 6 |
| 158 | Simon, 2021                                                   | The Covid-19 Vaccine Production Club: Will Value Chains Temper Nationalism?                                                                                        | 6 |
| 159 | Viviana Munoz, 2020                                           | The COVID-19 Pandemic: R&D and Intellectual Property Management for Access to Diagnostics, Medicines and Vaccines                                                  | 6 |

## Appendix 5: Data extraction form for factors influencing global equitable access to COVID-19 vaccines for Low-and Middle-Income Countries

1. Name of reviewer
2. First author and year of publication (Date) e.g. Li (2011)
3. Title
4. Inclusion criteria (all must be selected):
  - LMIC or globally focussed or normative guidance that affects LMIC
  - Published between 2005-2021
  - Discusses influenza/pandemic/COVID-19 vaccine(s)
  - Contains arguments/discussion on equity, access, allocation or prioritization of influenza/pandemic/COVID-19vaccine(s)
  - Published in English

Findings related to our Scoping Review research objective: What are the factors influencing global equitable access to a COVID-19 vaccine among countries?

5. Summarise: What does this article tell us about the knowledge related to allocation and pandemic vaccine(s)?
6. Key examples or illustrations from publication (including page numbers)
7. Summarise: What does this article tell us about the knowledge related to allocation and pandemic vaccine(s)?
8. Key examples or illustrations from publication (including page numbers)
9. Summarise: What does this article tell us about the knowledge related to allocation and pandemic vaccine(s)?
10. Key examples or illustrations from publication (including page numbers)
11. Summarise: What does this article tell us about the knowledge related to allocation and pandemic vaccine(s)?
12. Key examples or illustrations from publication (including page numbers)
13. Is there anything else that this study tells us about the knowledge in this topic area?
14. Challenges in implementing equitable access to vaccination
15. List any global initiatives/mechnasims/frameworks identified in our search that address equitable access to pandemic vaccine(s)?
16. Recommendations for strengthening equitable access to vaccination



### Appendix 1: Papers underlying this Scoping Review

List of the 44 papers included in the review, including the reference, type of publication and a short summary of the focus of the paper is shown in the table below.

| No | Reference (BMJ style)                                                                                                                                                                                                    | Study design         | Focus of paper                                                                                                                                                                                  |
|----|--------------------------------------------------------------------------------------------------------------------------------------------------------------------------------------------------------------------------|----------------------|-------------------------------------------------------------------------------------------------------------------------------------------------------------------------------------------------|
| 1  | Abbott FM, Reichman JH. Facilitating Access to Cross-Border Supplies of Patented Pharmaceuticals: The Case of the COVID-19 Pandemic. <i>Journal of International Economic Law</i> 2020;23(3):535-61.                     | Article              | Proposes legal mechanisms for addressing critical issues facing the international community in terms of providing equitable access to vaccines, treatments, diagnostics, and medical equipment. |
| 2  | Bollyky TJ, Gostin LO, Hamburg MA. The Equitable Distribution of COVID-19 Therapeutics and Vaccines. <i>Jama-Journal of the American Medical Association</i> 2020;323(24):2462-63. doi: 10.1001/jama.2020.6641           | Viewpoint            | Discusses experiences and suggestions for a future framework to the distribution of COVID-19 vaccines.                                                                                          |
| 3  | Choi EM. COVID-19 vaccines for low- and middle-income countries. <i>Transactions of the Royal Society of Tropical Medicine &amp; Hygiene</i> 2021;115(5):447-56.                                                         | Review               | Discusses low- and middle-income countries access COVID-19 vaccines, what is being done to distribute vaccines fairly, as well as the challenges ahead                                          |
| 4  | DeFrancesco L. Whither COVID-19 vaccines? <i>Nature Biotechnology</i> 2020;38(10):1132-45.                                                                                                                               | Article              | Insights from seven experts on the development of the COVID-19 vaccines.                                                                                                                        |
| 5  | Eccleston-Turner M. The pandemic influenza preparedness framework: A viable procurement option for developing states? <i>Medical Law International</i> 2017;17(4):227-48.                                                | Article              | Examines the Pandemic Influenza Framework and the content of the Obligations of the Company which have been secured by the World Health Organization.                                           |
| 6  | Eccleston-Turner M, Upton H. International Collaboration to Ensure Equitable Access to Vaccines for COVID-19: The ACT-Accelerator and the COVAX Facility. <i>Milbank Quarterly</i>                                       | Original Scholarship | Analysis of the COVAX Facility and its aim and ensure equitable availability of the vaccine in low and middle-income countries.                                                                 |
| 7  | Fedson DS. Pandemic influenza and the global vaccine supply. <i>Clin Infect Dis</i> 2003;36(12):1552-61.                                                                                                                 | Article              | The article explores several issues related to the global supply of vaccine during influenza pandemics                                                                                          |
| 8  | Fedson DS. Preparing for pandemic vaccination: an international policy agenda for vaccine development. <i>J Public Health Policy</i> 2005;26(1):4-29.                                                                    | Commentary           | Focuses on the trivalent vaccines currently available that contain inactivated viruses.                                                                                                         |
| 9  | Fedson DS, Dunnill P. Commentary: From scarcity to abundance: pandemic vaccines and other agents for "have not" countries. <i>J Public Health Policy</i> 2007;28(3):322-40.                                              | Commentary           | Discusses that access to supplies of pandemic vaccine for most countries is a problem of scarcity and how to ensure the "have not" countries will get access to pandemic vaccines.              |
| 10 | Felicitas H, Florencia L, Manriquez RT, et al. A matter of priority: equitable access to COVID-19 vaccines. <i>Swiss Med Wkly</i> 2021;151                                                                               | Viewpoint            | Highlights inequality in current vaccination rates between some high income countries (HIC) and low income countries (LIC) provides arguments for HIC to support distribution to LIC            |
| 11 | Fidler DP. Negotiating Equitable Access to Influenza Vaccines: Global Health Diplomacy and the Controversies Surrounding Avian Influenza H5N1 and Pandemic Influenza H1N1. <i>Plos Medicine</i> 2010;7(5)                | Article              | Examines the diplomatic negotiations surrounding influenza virus sharing as an example of the core tensions characterizing multilateralism and emerging forms of global health governance.      |
| 12 | Fidler DP. Vaccine nationalism's politics. <i>Science</i> 2020;369(6505):749.                                                                                                                                            | Editorial            | Discusses global politics and the burden of global equitable COVID-19 vaccine access issues, historically and now.                                                                              |
| 13 | Forman R, Anderson M, Jit M, et al. Ensuring access and affordability through COVID-19 vaccine research and development investments: A proposal for the options market for vaccines. <i>Vaccine</i> 2020;38(39):6075-77. | Commentary           | Discusses existing financing mechanisms and a proposal for vaccine development, referred to as Options Market for Vaccines (OMV).                                                               |
| 14 | Forman R, Shah S, Jeurissen P, et al. COVID-19 vaccine challenges: What have we learned so far and what remains to be done? <i>Health Policy</i> 2021;125(5):553-67.                                                     | Review               | Offers a framework for understanding remaining and new policy challenges for global vaccine campaigns against COVID-19 and potential solutions.                                                 |

| No | Reference (BMJ style)                                                                                                                                                                                                    | Study design        | Focus of paper                                                                                                                                                                                                                                        |
|----|--------------------------------------------------------------------------------------------------------------------------------------------------------------------------------------------------------------------------|---------------------|-------------------------------------------------------------------------------------------------------------------------------------------------------------------------------------------------------------------------------------------------------|
| 15 | Gray G, van der Heever A, Madhi S, et al. The Scientists' Collective 10-point proposal for equitable and timely access to COVID-19 vaccine in South Africa. <i>Samj South African Medical Journal</i> 2021;111(2):89-94. | (Guest) Editorial   | Proposes a ten-point plan for equitable and timely access to COVID-19 vaccine in South Africa.                                                                                                                                                        |
| 16 | Guzman J, Hafner T, Maiga LA, et al. COVID-19 vaccines pricing policy options for low-income and middle-income countries. <i>BMJ Global Health</i> 2021;6(3):03.                                                         | Commentary          | Discusses four pricing strategies to address high prices and obtain COVID-19 vaccines (and other medical products) at affordable rate.                                                                                                                |
| 17 | Herlitz A, Lederman Z, Miller J, et al. Just allocation of COVID-19 vaccines. <i>BMJ Global Health</i> 2021;6(2):02.                                                                                                     | Editorial           | Offers three suggestions to strengthen how to achieve the greatest health impact with authorized COVID-19 vaccines.                                                                                                                                   |
| 18 | Iacobucci G. Covid-19: How will a waiver on vaccine patents affect global supply? <i>BMJ</i> 2021;373:n1182.                                                                                                             | News analysis       | Presents responses from experts and organizations after Biden administration (US) announced to support a proposal to waive patents on covid-19 vaccines.                                                                                              |
| 19 | Kamradt-Scott A, Lee K. The 2011 Pandemic Influenza Preparedness Framework: Global Health Secured or a Missed Opportunity? <i>Political Studies</i> 2011;59(4):831-47.                                                   | Article             | Investigates the diplomatic negotiations surrounding influenza virus sharing, and evaluates the Pandemic Influenza Preparedness (PIP) framework.                                                                                                      |
| 20 | Kupferschmidt K. Global plan seeks to promote vaccine equity, spread risks. <i>Science</i> 2020;369(6503):489-90.                                                                                                        | News                | Discusses the COVAX facility and its challenges.                                                                                                                                                                                                      |
| 21 | Liu Y, Salwi S, Drolet BC. Multivalued ethical framework for fair global allocation of a COVID-19 vaccine. <i>Journal of medical ethics</i> 2020;46(8):499-501.                                                          | Article             | Analyses and synthesizes the ethical considerations of four allocation paradigms: ability to develop or purchase; reciprocity; ability to implement; and distributive justice.                                                                        |
| 22 | The Lancet. Global governance for COVID-19 vaccines. <i>Lancet (London, England)</i> 2020;395(10241):1883.                                                                                                               | Editorial           | Discusses the COVID-19 vaccine bidding war and the necessary global level arrangements to for development, finance, production, and distribution.                                                                                                     |
| 23 | The Lancet. Access to COVID-19 vaccines: looking beyond COVAX. <i>Lancet</i> 2021;397(10278):941.                                                                                                                        | Editorial           | Calls for a strong political leadership to support equitable access to vaccines                                                                                                                                                                       |
| 24 | McAdams D, McDade KK, Ogbuonji O, et al. Incentivising wealthy nations to participate in the COVID-19 Vaccine Global Access Facility (COVAX): a game theory perspective. <i>BMJ Global Health</i> 2020;5(11):11.         | Commentary          | Discusses how maximizing the benefit of bilateral deals to support COVAX, and explores how such deals can improve the global supply of vaccines.                                                                                                      |
| 25 | McMahon A. Global equitable access to vaccines, medicines and diagnostics for COVID-19: The role of patents as private governance. <i>Journal of Medical Ethics</i> 2020;30:30.                                          | Current controversy | Discusses the role of patents and highlights that during the COVID-19 pandemic the power of patent holders should be questioned.                                                                                                                      |
| 26 | Nhamo G, Chikodzi D, Kunene HP, et al. COVID-19 vaccines and treatments nationalism: Challenges for low-income countries and the attainment of the SDGs. <i>Global Public Health</i> 2021;16(3):319-39.                  | Article             | Discusses the 2030 Agenda for Sustainable Development and calls stakeholders for their continued support to Gavi and COVAX 'to leave no one behind' and eliminate inequalities.                                                                       |
| 27 | Pagliusi S, Hayman B, Jarrett S. Vaccines for a healthy future: 21st DCVMN Annual General Meeting 2020 report. <i>Vaccine</i> 2021;39(18):2479-88.                                                                       | Meeting Report      | Summary of a meeting where public and private sector participants presented challenges and opportunities related to vaccine R&D, supply chain, global policies, financing, health objectives, and supporting access for LMIC.                         |
| 28 | Phelan AL, Eccleston-Turner M, Rourke M, et al. Legal agreements: barriers and enablers to global equitable COVID-19 vaccine access. <i>Lancet</i> 2020;396(10254):800-02.                                               | Commentary          | Discusses role of law on equitable access to COVID-19 vaccines, highlighting challenges of bilateral agreements, advanced purchasing, and COVAX.                                                                                                      |
| 29 | Rourke MF. Access by Design, Benefits if Convenient: A Closer Look at the Pandemic Influenza Preparedness Framework's Standard Material Transfer Agreements. <i>Milbank Q</i> 2019;97(1):91-112.                         | Article             | Analyses the PIP Framework, its Standard Material Transfer Agreements (SMTAs), and secondary sources to determine whether the PIP Framework will effectively function as an access and benefit-sharing (ABS) instrument during an influenza pandemic. |

| No | Reference (BMJ style)                                                                                                                                                                                     | Study design     | Focus of paper                                                                                                                                                                                                                                    |
|----|-----------------------------------------------------------------------------------------------------------------------------------------------------------------------------------------------------------|------------------|---------------------------------------------------------------------------------------------------------------------------------------------------------------------------------------------------------------------------------------------------|
| 30 | Ruscio BA, Hotez P. Expanding global and national influenza vaccine systems to match the COVID-19 pandemic response. <i>Vaccine</i> 2020;38(50):7880-82.                                                  | Commentary       | Discusses the double burden synergies of Influenza and COVID 19 in the Global South, and proposes how a way to address both issues.                                                                                                               |
| 31 | Saksena N. Global justice and the COVID-19 vaccine: Limitations of the public goods framework. <i>Global Public Health</i> 2021                                                                           | Article          | Focuses on global access, discussing the limitations of the global public good framework in addressing the problem of distribution COVID-19 vaccines.                                                                                             |
| 32 | Sawal I, Ahmad S, Tariq W, et al. Unequal distribution of COVID-19 vaccine: A looming crisis. <i>Journal of Medical Virology</i> 2021;03:03.                                                              | Letter to Editor | Argues for the promotion of equitable access to COVID-19 vaccines to benefit the whole world.                                                                                                                                                     |
| 33 | Sharma S, Kawa N, Gomber A. WHO's allocation framework for COVAX: is it fair? <i>Journal of Medical Ethics</i> 2021;09:09.                                                                                | Article          | Explores comparing COVAX allocation mechanisms to a targeted allocation system, based on need. Arguing that this could maximize well-being and align with principles of equity.                                                                   |
| 34 | Sehovic AB, Govender K. Addressing COVID-19 vulnerabilities: How do we achieve global health security in an inequitable world. <i>Global Public Health</i> 2021                                           | Commentary       | Discusses the particular challenges of COVID-19 for LMICs, and the inequities being perpetuated in the COVID-19 Pandemic and the suggestions in how to address these challenges.                                                                  |
| 35 | So AD, Woo J. Reserving coronavirus disease 2019 vaccines for global access: cross sectional analysis. <i>Bmj-British Medical Journal</i> 2020;371                                                        | Special paper    | Analyzes premarket purchase commitments for COVID-19 vaccines from leading manufacturers to recipient countries.                                                                                                                                  |
| 36 | So AD, Woo J. Achieving path-dependent equity for global COVID-19 vaccine allocation. <i>Medicina Intensiva</i> 2021;2(4):373-77.                                                                         | Commentary       | Discusses the interdependence of equitable allocation based on three policy levers: Development and Production, Procurement, and Healthcare Delivery.                                                                                             |
| 37 | Torres I, Artaza O, Profeta B, et al. COVID-19 vaccination: returning to WHO's Health For All. <i>The Lancet Global Health</i> 2020;8(11):e1355-e56.                                                      | Commentary       | Promotes the perspective of World Health Organization, calling for inclusion of all member states, and transparency.                                                                                                                              |
| 38 | Towse A, Chalkidou K, Firth I, et al. How Should the World Pay for a Coronavirus Disease (COVID-19) Vaccine? <i>Value in Health</i> 2021;24(5):625-31.                                                    | Article          | Proposes the Benefit-Based Advance Market Commitment as a collaborative, market-based financing mechanism for the world to incentivize and pay for the development and provide equitable access to second and third generation COVID-19 vaccines. |
| 39 | Turner M. Vaccine procurement during an influenza pandemic and the role of Advance Purchase Agreements: Lessons from 2009-H1N1. <i>Glob Public Health</i> 2016;11(3):322-35.                              | Article          | A case study on the procurement of pandemic influenza vaccines during 2009-H1N1, and the likely manner in which procurement will occur during future pandemics.                                                                                   |
| 40 | Usher AD. COVID-19 vaccines for all? <i>Lancet (London, England)</i> 2020;395(10240):1822-23.                                                                                                             | World report     | Provides an assessment of the initiatives being planned to ensure equitable access to COVID-19 vaccines, and shortcomings.                                                                                                                        |
| 41 | Usher AD. CEPI criticised for lack of transparency. <i>Lancet</i> 2021;397(10271):265-66.                                                                                                                 | World Report     | Provides insights and perspectives on CEPI contracts for COVID-19 vaccines.                                                                                                                                                                       |
| 42 | Usher AD. South Africa and India push for COVID-19 patents ban. <i>Lancet</i> 2020;396(10265):1790-91.                                                                                                    | World Report     | Report on the proposal by India and South Africa to waiver Intellectual Property Rights to COVID-19 products (incl. vaccines).                                                                                                                    |
| 43 | Wouters OJ, Shadlen KC, Salcher-Konrad M, et al. Challenges in ensuring global access to COVID-19 vaccines: production, affordability, allocation, and deployment. <i>Lancet</i> 2021;397(10278):1023-34. | Article          | Reviews potential challenges and policy implications for the production, affordable pricing, and global allocation of Covid-19 vaccines.                                                                                                          |
| 44 | Yamey G, Schäferhoff M, Hatchett R, et al. Ensuring global access to COVID-19 vaccines. <i>Lancet (London, England)</i> 2020;395(10234):1405-06.                                                          | Commentary       | Discusses how COVID-19 vaccines can be used globally to end the COVID-19 pandemic, arguing for three imperatives: speed, manufacture and deployment at scale, and global access.                                                                  |

## Preferred Reporting Items for Systematic reviews and Meta-Analyses extension for Scoping Reviews (PRISMA-ScR) Checklist

| SECTION                                               | ITEM | PRISMA-ScR CHECKLIST ITEM                                                                                                                                                                                                                                                                                  | REPORTED ON PAGE # |
|-------------------------------------------------------|------|------------------------------------------------------------------------------------------------------------------------------------------------------------------------------------------------------------------------------------------------------------------------------------------------------------|--------------------|
| <b>TITLE</b>                                          |      |                                                                                                                                                                                                                                                                                                            |                    |
| Title                                                 | 1    | Identify the report as a scoping review.                                                                                                                                                                                                                                                                   | 1                  |
| <b>ABSTRACT</b>                                       |      |                                                                                                                                                                                                                                                                                                            |                    |
| Structured summary                                    | 2    | Provide a structured summary that includes (as applicable): background, objectives, eligibility criteria, sources of evidence, charting methods, results, and conclusions that relate to the review questions and objectives.                                                                              | 2                  |
| <b>INTRODUCTION</b>                                   |      |                                                                                                                                                                                                                                                                                                            |                    |
| Rationale                                             | 3    | Describe the rationale for the review in the context of what is already known. Explain why the review questions/objectives lend themselves to a scoping review approach.                                                                                                                                   | 4, 5, 6            |
| Objectives                                            | 4    | Provide an explicit statement of the questions and objectives being addressed with reference to their key elements (e.g., population or participants, concepts, and context) or other relevant key elements used to conceptualize the review questions and/or objectives.                                  | 7                  |
| <b>METHODS</b>                                        |      |                                                                                                                                                                                                                                                                                                            |                    |
| Protocol and registration                             | 5    | Indicate whether a review protocol exists; state if and where it can be accessed (e.g., a Web address); and if available, provide registration information, including the registration number.                                                                                                             | 7                  |
| Eligibility criteria                                  | 6    | Specify characteristics of the sources of evidence used as eligibility criteria (e.g., years considered, language, and publication status), and provide a rationale.                                                                                                                                       | 8                  |
| Information sources*                                  | 7    | Describe all information sources in the search (e.g., databases with dates of coverage and contact with authors to identify additional sources), as well as the date the most recent search was executed.                                                                                                  | 7                  |
| Search                                                | 8    | Present the full electronic search strategy for at least 1 database, including any limits used, such that it could be repeated.                                                                                                                                                                            | 8                  |
| Selection of sources of evidence†                     | 9    | State the process for selecting sources of evidence (i.e., screening and eligibility) included in the scoping review.                                                                                                                                                                                      | 8                  |
| Data charting process‡                                | 10   | Describe the methods of charting data from the included sources of evidence (e.g., calibrated forms or forms that have been tested by the team before their use, and whether data charting was done independently or in duplicate) and any processes for obtaining and confirming data from investigators. | 8                  |
| Data items                                            | 11   | List and define all variables for which data were sought and any assumptions and simplifications made.                                                                                                                                                                                                     | 8                  |
| Critical appraisal of individual sources of evidence§ | 12   | If done, provide a rationale for conducting a critical appraisal of included sources of evidence; describe the methods used and how this information was used in any data synthesis (if appropriate).                                                                                                      | N/A                |



| SECTION                                       | ITEM | PRISMA-ScR CHECKLIST ITEM                                                                                                                                                                       | REPORTED ON PAGE # |
|-----------------------------------------------|------|-------------------------------------------------------------------------------------------------------------------------------------------------------------------------------------------------|--------------------|
| Synthesis of results                          | 13   | Describe the methods of handling and summarizing the data that were charted.                                                                                                                    | 8                  |
| <b>RESULTS</b>                                |      |                                                                                                                                                                                                 |                    |
| Selection of sources of evidence              | 14   | Give numbers of sources of evidence screened, assessed for eligibility, and included in the review, with reasons for exclusions at each stage, ideally using a flow diagram.                    | 9                  |
| Characteristics of sources of evidence        | 15   | For each source of evidence, present characteristics for which data were charted and provide the citations.                                                                                     | 9-20               |
| Critical appraisal within sources of evidence | 16   | If done, present data on critical appraisal of included sources of evidence (see item 12).                                                                                                      | 9-20               |
| Results of individual sources of evidence     | 17   | For each included source of evidence, present the relevant data that were charted that relate to the review questions and objectives.                                                           | 9-20               |
| Synthesis of results                          | 18   | Summarize and/or present the charting results as they relate to the review questions and objectives.                                                                                            | 9-20               |
| <b>DISCUSSION</b>                             |      |                                                                                                                                                                                                 |                    |
| Summary of evidence                           | 19   | Summarize the main results (including an overview of concepts, themes, and types of evidence available), link to the review questions and objectives, and consider the relevance to key groups. | 9 & 20-23          |
| Limitations                                   | 20   | Discuss the limitations of the scoping review process.                                                                                                                                          | 23                 |
| Conclusions                                   | 21   | Provide a general interpretation of the results with respect to the review questions and objectives, as well as potential implications and/or next steps.                                       | 24                 |
| <b>FUNDING</b>                                |      |                                                                                                                                                                                                 |                    |
| Funding                                       | 22   | Describe sources of funding for the included sources of evidence, as well as sources of funding for the scoping review. Describe the role of the funders of the scoping review.                 | 3                  |

JBI = Joanna Briggs Institute; PRISMA-ScR = Preferred Reporting Items for Systematic reviews and Meta-Analyses extension for Scoping Reviews.

\* Where *sources of evidence* (see second footnote) are compiled from, such as bibliographic databases, social media platforms, and Web sites.

† A more inclusive/heterogeneous term used to account for the different types of evidence or data sources (e.g., quantitative and/or qualitative research, expert opinion, and policy documents) that may be eligible in a scoping review as opposed to only studies. This is not to be confused with *information sources* (see first footnote).

‡ The frameworks by Arksey and O'Malley (6) and Levac and colleagues (7) and the JBI guidance (4, 5) refer to the process of data extraction in a scoping review as data charting.

§ The process of systematically examining research evidence to assess its validity, results, and relevance before using it to inform a decision. This term is used for items 12 and 19 instead of "risk of bias" (which is more applicable to systematic reviews of interventions) to include and acknowledge the various sources of evidence that may be used in a scoping review (e.g., quantitative and/or qualitative research, expert opinion, and policy document).

From: Tricco AC, Lillie E, Zarin W, O'Brien KK, Colquhoun H, Levac D, et al. PRISMA Extension for Scoping Reviews (PRISMA-ScR): Checklist and Explanation. *Ann Intern Med.* 2018;169:467–473. doi: 10.7326/M18-0850.

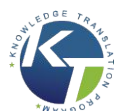

St. Michael's

Inspired Care.  
Inspiring Science.

For peer review only - <http://bmjopen.bmj.com/site/about/guidelines.xhtml>
