# Supplementary material for: Global access to COVID-19 vaccines: a scoping review of factors that may influence equitable access for low and middle-income countries
Source: PubMed Central journal article supplement — BMJ Open. 2021 Sep 30;11(9):e049505. doi: 10.1136/bmjopen-2021-049505 (PMC8487019; doi:10.1136/bmjopen-2021-049505), 2021-09-30
Supplement: bmjopen-2021-049505supp004.pdf [file bmjopen-2021-049505supp004.pdf]

**Appendix 5: Data extraction form for factors influencing global equitable access to COVID-19 vaccines for Low-and Middle-Income Countries**

1. Name of reviewer
2. First author and year of publication (Date) e.g. Li (2011)
3. Title
4. Inclusion criteria (all must be selected):
  - LMIC or globally focussed or normative guidance that affects LMIC
  - Published between 2005-2021
  - Discusses influenza/pandemic/COVID-19 vaccine(s)
  - Contains arguments/discussion on equity, access, allocation or prioritization of influenza/pandemic/COVID-19vaccine(s)
  - Published in English

Findings related to our Scoping Review research objective: What are the factors influencing global equitable access to a COVID-19 vaccine among countries?

5. Summarise: What does this article tell us about the knowledge related to allocation and pandemic vaccine(s)?
6. Key examples or illustrations from publication (including page numbers)
7. Summarise: What does this article tell us about the knowledge related to allocation and pandemic vaccine(s)?
8. Key examples or illustrations from publication (including page numbers)
9. Summarise: What does this article tell us about the knowledge related to allocation and pandemic vaccine(s)?
10. Key examples or illustrations from publication (including page numbers)
11. Summarise: What does this article tell us about the knowledge related to allocation and pandemic vaccine(s)?
12. Key examples or illustrations from publication (including page numbers)
13. Is there anything else that this study tells us about the knowledge in this topic area?
14. Challenges in implementing equitable access to vaccination
15. List any global initiatives/mechanisms/frameworks identified in our search that address equitable access to pandemic vaccine(s)?
16. Recommendations for strengthening equitable access to vaccination
