# Supplementary material for: Global access to COVID-19 vaccines: a scoping review of factors that may influence equitable access for low and middle-income countries
Source: HighWire-hosted journal article supplement (doi:10.1136/bmjopen-2021-049505), 2021-09-01
Supplement: bmjopen-2021-049505supp005_data_supplement.pdf [file bmjopen-2021-049505supp005_data_supplement.pdf]

**Appendix 5: Papers underlying this Scoping Review**

List of the 44 papers included in the review, including the reference, type of publication and a short summary of the focus of the paper is shown in the table below.

| No | Reference (BMJ style)                                                                                                                                                                                                    | Study design         | Focus of paper                                                                                                                                                                                  |
|----|--------------------------------------------------------------------------------------------------------------------------------------------------------------------------------------------------------------------------|----------------------|-------------------------------------------------------------------------------------------------------------------------------------------------------------------------------------------------|
| 1  | Abbott FM, Reichman JH. Facilitating Access to Cross-Border Supplies of Patented Pharmaceuticals: The Case of the COVID-19 Pandemic. <i>Journal of International Economic Law</i> 2020;23(3):535-61.                     | Article              | Proposes legal mechanisms for addressing critical issues facing the international community in terms of providing equitable access to vaccines, treatments, diagnostics, and medical equipment. |
| 2  | Bollyky TJ, Gostin LO, Hamburg MA. The Equitable Distribution of COVID-19 Therapeutics and Vaccines. <i>Jama-Journal of the American Medical Association</i> 2020;323(24):2462-63. doi: 10.1001/jama.2020.6641           | Viewpoint            | Discusses experiences and suggestions for a future framework to the distribution of COVID-19 vaccines.                                                                                          |
| 3  | Choi EM. COVID-19 vaccines for low- and middle-income countries. <i>Transactions of the Royal Society of Tropical Medicine &amp; Hygiene</i> 2021;115(5):447-56.                                                         | Review               | Discusses low- and middle-income countries access COVID-19 vaccines, what is being done to distribute vaccines fairly, as well as the challenges ahead                                          |
| 4  | DeFrancesco L. Whither COVID-19 vaccines? <i>Nature Biotechnology</i> 2020;38(10):1132-45.                                                                                                                               | Article              | Insights from seven experts on the development of the COVID-19 vaccines.                                                                                                                        |
| 5  | Eccleston-Turner M. The pandemic influenza preparedness framework: A viable procurement option for developing states? <i>Medical Law International</i> 2017;17(4):227-48.                                                | Article              | Examines the Pandemic Influenza Framework and the content of the Obligations of the Company which have been secured by the World Health Organization.                                           |
| 6  | Eccleston-Turner M, Upton H. International Collaboration to Ensure Equitable Access to Vaccines for COVID-19: The ACT-Accelerator and the COVAX Facility. <i>Milbank Quarterly</i>                                       | Original Scholarship | Analysis of the COVAX Facility and its aim and ensure equitable availability of the vaccine in low and middle-income countries.                                                                 |
| 7  | Fedson DS. Pandemic influenza and the global vaccine supply. <i>Clin Infect Dis</i> 2003;36(12):1552-61.                                                                                                                 | Article              | The article explores several issues related to the global supply of vaccine during influenza pandemics                                                                                          |
| 8  | Fedson DS. Preparing for pandemic vaccination: an international policy agenda for vaccine development. <i>J Public Health Policy</i> 2005;26(1):4-29.                                                                    | Commentary           | Focuses on the trivalent vaccines currently available that contain inactivated viruses.                                                                                                         |
| 9  | Fedson DS, Dunnill P. Commentary: From scarcity to abundance: pandemic vaccines and other agents for "have not" countries. <i>J Public Health Policy</i> 2007;28(3):322-40.                                              | Commentary           | Discusses that access to supplies of pandemic vaccine for most countries is a problem of scarcity and how to ensure the "have not" countries will get access to pandemic vaccines.              |
| 10 | Felicitas H, Florencia L, Manriquez RT, et al. A matter of priority: equitable access to COVID-19 vaccines. <i>Swiss Med Wkly</i> 2021;151                                                                               | Viewpoint            | Highlights inequality in current vaccination rates between some high income countries (HIC) and low income countries (LIC) provides arguments for HIC to support distribution to LIC            |
| 11 | Fidler DP. Negotiating Equitable Access to Influenza Vaccines: Global Health Diplomacy and the Controversies Surrounding Avian Influenza H5N1 and Pandemic Influenza H1N1. <i>Plos Medicine</i> 2010;7(5)                | Article              | Examines the diplomatic negotiations surrounding influenza virus sharing as an example of the core tensions characterizing multilateralism and emerging forms of global health governance.      |
| 12 | Fidler DP. Vaccine nationalism's politics. <i>Science</i> 2020;369(6505):749.                                                                                                                                            | Editorial            | Discusses global politics and the burden of global equitable COVID-19 vaccine access issues, historically and now.                                                                              |
| 13 | Forman R, Anderson M, Jit M, et al. Ensuring access and affordability through COVID-19 vaccine research and development investments: A proposal for the options market for vaccines. <i>Vaccine</i> 2020;38(39):6075-77. | Commentary           | Discusses existing financing mechanisms and a proposal for vaccine development, referred to as Options Market for Vaccines (OMV).                                                               |
| 14 | Forman R, Shah S, Jeurissen P, et al. COVID-19 vaccine challenges: What have we learned so far and what remains to be done? <i>Health Policy</i> 2021;125(5):553-67.                                                     | Review               | Offers a framework for understanding remaining and new policy challenges for global vaccine campaigns against COVID-19 and potential solutions.                                                 |

| No | Reference (BMJ style)                                                                                                                                                                                                     | Study design        | Focus of paper                                                                                                                                                                                                                                        |
|----|---------------------------------------------------------------------------------------------------------------------------------------------------------------------------------------------------------------------------|---------------------|-------------------------------------------------------------------------------------------------------------------------------------------------------------------------------------------------------------------------------------------------------|
| 15 | Gray G, van der Heever A, Madhi S, et al. The Scientists' Collective 10-point proposal for equitable and timeous access to COVID-19 vaccine in South Africa. <i>Samj South African Medical Journal</i> 2021;111(2):89-94. | (Guest) Editorial   | Proposes a ten-point plan for equitable and timely access to COVID-19 vaccine in South Africa.                                                                                                                                                        |
| 16 | Guzman J, Hafner T, Maiga LA, et al. COVID-19 vaccines pricing policy options for low-income and middle- income countries. <i>BMJ Global Health</i> 2021;6(3):03.                                                         | Commentary          | Discusses four pricing strategies to address high prices and obtain COVID-19 vaccines (and other medical products) at affordable rate.                                                                                                                |
| 17 | Herlitz A, Lederman Z, Miller J, et al. Just allocation of COVID-19 vaccines. <i>BMJ Global Health</i> 2021;6(2):02.                                                                                                      | Editorial           | Offers three suggestions to strengthen how to achieve the greatest health impact with authorized COVID-19 vaccines.                                                                                                                                   |
| 18 | Iacobucci G. Covid-19: How will a waiver on vaccine patents affect global supply? <i>BMJ</i> 2021;373:n1182.                                                                                                              | News analysis       | Presents responses from experts and organizations after Biden administration (US) announced to support a proposal to waive patents on covid-19 vaccines.                                                                                              |
| 19 | Kamradt-Scott A, Lee K. The 2011 Pandemic Influenza Preparedness Framework: Global Health Secured or a Missed Opportunity? <i>Political Studies</i> 2011;59(4):831-47.                                                    | Article             | Investigates the diplomatic negotiations surrounding influenza virus sharing, and evaluates the Pandemic Influenza Preparedness (PIP) framework.                                                                                                      |
| 20 | Kupferschmidt K. Global plan seeks to promote vaccine equity, spread risks. <i>Science</i> 2020;369(6503):489-90.                                                                                                         | News                | Discusses the COVAX facility and its challenges.                                                                                                                                                                                                      |
| 21 | Liu Y, Salwi S, Drolet BC. Multivalued ethical framework for fair global allocation of a COVID-19 vaccine. <i>Journal of medical ethics</i> 2020;46(8):499-501.                                                           | Article             | Analyses and synthesizes the ethical considerations of four allocation paradigms: ability to develop or purchase; reciprocity; ability to implement; and distributive justice.                                                                        |
| 22 | The Lancet. Global governance for COVID-19 vaccines. <i>Lancet (London, England)</i> 2020;395(10241):1883.                                                                                                                | Editorial           | Discusses the COVID-19 vaccine bidding war and the necessary global level arrangements to for development, finance, production, and distribution.                                                                                                     |
| 23 | The Lancet. Access to COVID-19 vaccines: looking beyond COVAX. <i>Lancet</i> 2021;397(10278):941.                                                                                                                         | Editorial           | Calls for a strong political leadership to support equitable access to vaccines                                                                                                                                                                       |
| 24 | McAdams D, McDade KK, Ogbuogi O, et al. Incentivising wealthy nations to participate in the COVID-19 Vaccine Global Access Facility (COVAX): a game theory perspective. <i>BMJ Global Health</i> 2020;5(11):11.           | Commentary          | Discusses how maximizing the benefit of bilateral deals to support COVAX, and explores how such deals can improve the global supply of vaccines.                                                                                                      |
| 25 | McMahon A. Global equitable access to vaccines, medicines and diagnostics for COVID-19: The role of patents as private governance. <i>Journal of Medical Ethics</i> 2020;30:30.                                           | Current controversy | Discusses the role of patents and highlights that during the COVID-19 pandemic the power of patent holders should be questioned.                                                                                                                      |
| 26 | Nhamo G, Chikodzi D, Kunene HP, et al. COVID-19 vaccines and treatments nationalism: Challenges for low-income countries and the attainment of the SDGs. <i>Global Public Health</i> 2021;16(3):319-39.                   | Article             | Discusses the 2030 Agenda for Sustainable Development and calls stakeholders for their continued support to Gavi and COVAX 'to leave no one behind' and eliminate inequalities.                                                                       |
| 27 | Pagliusi S, Hayman B, Jarrett S. Vaccines for a healthy future: 21st DCVMN Annual General Meeting 2020 report. <i>Vaccine</i> 2021;39(18):2479-88.                                                                        | Meeting Report      | Summary of a meeting where public and private sector participants presented challenges and opportunities related to vaccine R&D, supply chain, global policies, financing, health objectives, and supporting access for LMIC.                         |
| 28 | Phelan AL, Eccleston-Turner M, Rourke M, et al. Legal agreements: barriers and enablers to global equitable COVID-19 vaccine access. <i>Lancet</i> 2020;396(10254):800-02.                                                | Commentary          | Discusses role of law on equitable access to COVID-19 vaccines, highlighting challenges of bilateral agreements, advanced purchasing, and COVAX.                                                                                                      |
| 29 | Rourke MF. Access by Design, Benefits if Convenient: A Closer Look at the Pandemic Influenza Preparedness Framework's Standard Material Transfer Agreements. <i>Milbank Q</i> 2019;97(1):91-112.                          | Article             | Analyses the PIP Framework, its Standard Material Transfer Agreements (SMTAs), and secondary sources to determine whether the PIP Framework will effectively function as an access and benefit-sharing (ABS) instrument during an influenza pandemic. |

| No | Reference (BMJ style)                                                                                                                                                                                     | Study design     | Focus of paper                                                                                                                                                                                                                                    |
|----|-----------------------------------------------------------------------------------------------------------------------------------------------------------------------------------------------------------|------------------|---------------------------------------------------------------------------------------------------------------------------------------------------------------------------------------------------------------------------------------------------|
| 30 | Ruscio BA, Hotez P. Expanding global and national influenza vaccine systems to match the COVID-19 pandemic response. <i>Vaccine</i> 2020;38(50):7880-82.                                                  | Commentary       | Discusses the double burden synergies of Influenza and COVID 19 in the Global South, and proposes how a way to address both issues.                                                                                                               |
| 31 | Saksena N. Global justice and the COVID-19 vaccine: Limitations of the public goods framework. <i>Global Public Health</i> 2021                                                                           | Article          | Focuses on global access, discussing the limitations of the global public good framework in addressing the problem of distribution COVID-19 vaccines.                                                                                             |
| 32 | Sawal I, Ahmad S, Tariq W, et al. Unequal distribution of COVID-19 vaccine: A looming crisis. <i>Journal of Medical Virology</i> 2021;03:03.                                                              | Letter to Editor | Argues for the promotion of equitable access to COVID-19 vaccines to benefit the whole world.                                                                                                                                                     |
| 33 | Sharma S, Kawa N, Gomber A. WHO's allocation framework for COVAX: is it fair? <i>Journal of Medical Ethics</i> 2021;09:09.                                                                                | Article          | Explores comparing COVAX allocation mechanisms to a targeted allocation system, based on need. Arguing that this could maximize well-being and align with principles of equity.                                                                   |
| 34 | Sehovic AB, Govender K. Addressing COVID-19 vulnerabilities: How do we achieve global health security in an inequitable world. <i>Global Public Health</i> 2021                                           | Commentary       | Discusses the particular challenges of COVID-19 for LMICs, and the inequities being perpetuated in the COVID-19 Pandemic and the suggestions in how to address these challenges.                                                                  |
| 35 | So AD, Woo J. Reserving coronavirus disease 2019 vaccines for global access: cross sectional analysis. <i>Bmj-British Medical Journal</i> 2020;371                                                        | Special paper    | Analyzes premarket purchase commitments for COVID-19 vaccines from leading manufacturers to recipient countries.                                                                                                                                  |
| 36 | So AD, Woo J. Achieving path-dependent equity for global COVID-19 vaccine allocation. <i>Medicina Intensiva</i> 2021;2(4):373-77.                                                                         | Commentary       | Discusses the interdependence of equitable allocation based on three policy levers: Development and Production, Procurement, and Healthcare Delivery.                                                                                             |
| 37 | Torres I, Artaza O, Profeta B, et al. COVID-19 vaccination: returning to WHO's Health For All. <i>The Lancet Global Health</i> 2020;8(11):e1355-e56.                                                      | Commentary       | Promotes the perspective of World Health Organization, calling for inclusion of all member states, and transparency.                                                                                                                              |
| 38 | Towse A, Chalkidou K, Firth I, et al. How Should the World Pay for a Coronavirus Disease (COVID-19) Vaccine? <i>Value in Health</i> 2021;24(5):625-31.                                                    | Article          | Proposes the Benefit-Based Advance Market Commitment as a collaborative, market-based financing mechanism for the world to incentivize and pay for the development and provide equitable access to second and third generation COVID-19 vaccines. |
| 39 | Turner M. Vaccine procurement during an influenza pandemic and the role of Advance Purchase Agreements: Lessons from 2009-H1N1. <i>Glob Public Health</i> 2016;11(3):322-35.                              | Article          | A case study on the procurement of pandemic influenza vaccines during 2009-H1N1, and the likely manner in which procurement will occur during future pandemics.                                                                                   |
| 40 | Usher AD. COVID-19 vaccines for all? <i>Lancet (London, England)</i> 2020;395(10240):1822-23.                                                                                                             | World report     | Provides an assessment of the initiatives being planned to ensure equitable access to COVID-19 vaccines, and shortcomings.                                                                                                                        |
| 41 | Usher AD. CEPI criticised for lack of transparency. <i>Lancet</i> 2021;397(10271):265-66.                                                                                                                 | World Report     | Provides insights and perspectives on CEPI contracts for COVID-19 vaccines.                                                                                                                                                                       |
| 42 | Usher AD. South Africa and India push for COVID-19 patents ban. <i>Lancet</i> 2020;396(10265):1790-91.                                                                                                    | World Report     | Report on the proposal by India and South Africa to waiver Intellectual Property Rights to COVID-19 products (incl. vaccines).                                                                                                                    |
| 43 | Wouters OJ, Shadlen KC, Salcher-Konrad M, et al. Challenges in ensuring global access to COVID-19 vaccines: production, affordability, allocation, and deployment. <i>Lancet</i> 2021;397(10278):1023-34. | Article          | Reviews potential challenges and policy implications for the production, affordable pricing, and global allocation of Covid-19 vaccines.                                                                                                          |
| 44 | Yamey G, Schäferhoff M, Hatchett R, et al. Ensuring global access to COVID-19 vaccines. <i>Lancet (London, England)</i> 2020;395(10234):1405-06.                                                          | Commentary       | Discusses how COVID-19 vaccines can be used globally to end the COVID-19 pandemic, arguing for three imperatives: speed, manufacture and deployment at scale, and global access.                                                                  |
