# Supplementary material for: Global access to COVID-19 vaccines: a scoping review of factors that may influence equitable access for low and middle-income countries
Source: PubMed Central journal article supplement — BMJ Open. 2021 Sep 30;11(9):e049505. doi: 10.1136/bmjopen-2021-049505 (PMC8487019; doi:10.1136/bmjopen-2021-049505), 2021-09-30
Supplement: bmjopen-2021-049505supp008.pdf [file bmjopen-2021-049505supp008.pdf]

### Appendix 3: Excluded articles and reason for exclusion

**Reason for exclusion key:** 1: mentions issue but lacks detail or did not add new insight to factors related to equitable access, 2: discusses within, not amongst countries, 3: irrelevant, 4: not English, 5: full-text unavailable, 6: not in peer reviewed journal.

| Nr* | First author, year  | Title                                                                                                                                                                                 | Reason excluded |
|-----|---------------------|---------------------------------------------------------------------------------------------------------------------------------------------------------------------------------------|-----------------|
| 1   | Acharya, 2021       | Access to and equitable distribution of COVID-19 vaccine in low-income countries                                                                                                      | 1               |
| 2   | Anonymous, 2021     | Why a pioneering plan to distribute COVID vaccines equitably must succeed                                                                                                             | 1               |
| 3   | Anonymous, 2021     | It's time to consider a patent reprieve for COVID vaccines                                                                                                                            | 1               |
| 4   | Aryeetey, 2021      | A step backwards in the fight against global vaccine inequities                                                                                                                       | 1               |
| 5   | Bennett, 2010       | Law, ethics and pandemic preparedness: the importance of cross-jurisdictional and cross-cultural perspectives                                                                         | 1               |
| 6   | Binagwaho, 2021     | Equitable and Effective Distribution of the COVID-19 Vaccines - A Scientific and Moral Obligation                                                                                     | 1               |
| 7   | Burki, 2021         | Equitable distribution of COVID-19 vaccines                                                                                                                                           | 1               |
| 8   | Burki, 2021         | Challenges in the rollout of COVID-19 vaccines worldwide                                                                                                                              | 1               |
| 9   | Cohen, 2021         | As vaccines emerge, a global waiting game begins                                                                                                                                      | 1               |
| 10  | Emanuel, 2020       | An ethical framework for global vaccine allocation                                                                                                                                    | 1               |
| 11  | Ferguson, 2020      | Love thy neighbour? Allocating vaccines in a world of competing obligations                                                                                                           | 1               |
| 12  | Fisher, 2011        | Pandemic response lessons from influenza H1N1 2009 in Asia                                                                                                                            | 1               |
| 13  | Friede, 2011        | WHO initiative to increase global and equitable access to influenza vaccine in the event of a pandemic: supporting developing country production capacity through technology transfer | 1               |
| 14  | Garfinkel, 2020     | Survival of the Wealthiest?                                                                                                                                                           | 1               |
| 15  | Gostin, 2020        | Facilitating Access to a COVID-19 Vaccine through Global Health Law                                                                                                                   | 1               |
| 16  | Haaheim, 2009       | Pandemic influenza vaccines - the challenges                                                                                                                                          | 1               |
| 17  | Hay, 2018           | The WHO global influenza surveillance and response system (GISRS)-A future perspective                                                                                                | 1               |
| 18  | Herzog, 2021        | Covax must go beyond proportional allocation of covid vaccines to ensure fair and equitable access                                                                                    | 1               |
| 19  | Hessel, 2009        | Pandemic influenza vaccines: Meeting the supply, distribution and deployment challenges                                                                                               | 1               |
| 20  | Ho, 2020            | Global Disparity and Solidarity in a Pandemic                                                                                                                                         | 1               |
| 21  | Hurley, 2021        | It's self-interest to share our vaccines globally                                                                                                                                     | 1               |
| 22  | Kamradt-Scott, 2012 | Evidence-based medicine and the governance of pandemic influenza                                                                                                                      | 1               |
| 23  | Kim, 2021           | Operation Warp Speed: implications for global vaccine security                                                                                                                        | 1               |
| 24  | Kimble, 2021        | Considerations on the distribution and administration of the new COVID-19 vaccines                                                                                                    | 1               |
| 25  | Kupferschmidt, 2020 | Despite obstacles, WHO unveils plan to distribute vaccine                                                                                                                             | 1               |
| 26  | Lie, n.d.           | Allocating a COVID-19 Vaccine: Balancing National and International Responsibilities                                                                                                  | 1               |
| 27  | Lomazzi, 2020       | Equitable access to COVID-19 vaccination: a distant dream?                                                                                                                            | 1               |
| 28  | Megiddo, 2020       | Fairer financing of vaccines in a world living with COVID-19                                                                                                                          | 1               |
| 29  | Meyer, 2020         | After a COVID-19 vaccine: Collaboration or competition?                                                                                                                               | 1               |
| 30  | Milstien, 2003      | Emergency response vaccines: Lessons learned in response to communicable diseases                                                                                                     | 1               |
| 31  | Munguia-Lopez, 2021 | Fair Allocation of Potential COVID-19 Vaccines Using an Optimization-Based Strategy                                                                                                   | 1               |
| 32  | Nannei, 2016        | Stakeholders' perceptions of 10years of the Global Action Plan for Influenza Vaccines (GAP) - Results from a survey                                                                   | 1               |

|    |                        |                                                                                                                                                              |   |
|----|------------------------|--------------------------------------------------------------------------------------------------------------------------------------------------------------|---|
| 33 | Nazar, 2020            | All for vaccine, vaccine for all                                                                                                                             | 1 |
| 34 | Nkengasong, 2020       | COVID-19 vaccines: how to ensure Africa has access                                                                                                           | 1 |
| 35 | Ogbogu, 2020           | Bioethics and practical justice in the post-COVID-19 era                                                                                                     | 1 |
| 36 | Orit Fischman, 2021    | A Global Pandemic Remedy to Vaccine Nationalism                                                                                                              | 1 |
| 37 | Punjabi, 2021          | Vaccine is health and health is wealth                                                                                                                       | 1 |
| 38 | Rodríguez Mega, 2020   | Latin American scientists join the coronavirus vaccine race: 'No one's coming to rescue us'                                                                  | 1 |
| 39 | Ropero-Alvarez, 2012   | Pandemic influenza vaccination: lessons learned from Latin America and the Caribbean                                                                         | 1 |
| 40 | Sadeghi, 2021          | The commitment for fair distribution of COVID-19 vaccine among all countries of the world.                                                                   | 1 |
| 41 | Schwartz, 2009         | Prioritization of pandemic influenza vaccine: Rationale and strategy for decision making                                                                     | 1 |
| 42 | Schwartz, 2020         | Equitable global access to coronavirus disease 2019 vaccines                                                                                                 | 1 |
| 43 | Sharun, 2021           | COVID-19 vaccine diplomacy and equitable access to vaccines amid ongoing pandemic                                                                            | 1 |
| 44 | The Lancet, 2020       | Global collaboration for health: rhetoric versus reality                                                                                                     | 1 |
| 45 | Usman, 2020            | After the Coronavirus Vaccine's Discovery: Concerns Regarding a COVID-19 Vaccination's Distribution                                                          | 1 |
| 46 | Yamada, 2009           | Poverty, wealth, and access to pandemic influenza vaccines                                                                                                   | 1 |
| 47 | Yen, 2015              | The development of global vaccine stockpiles                                                                                                                 | 1 |
| 48 | Zimmerman, 2007        | Rationing of influenza vaccine during a pandemic: ethical analyses                                                                                           | 1 |
| 49 | Abramowitz, 2020       | Transparent, equitable, safe, and effective use of COVID-19 vaccines: A societal imperative                                                                  | 2 |
| 50 | Adebambo Anthony, 2020 | Intellectual Property Rights, Pharmaceutical Patents and Public Health: Adopting Compulsory and Government Use Licenses in the COVID-19 Emergency in Nigeria | 2 |
| 51 | Ana Santos, 2020       | Comments on the Preliminary Framework for Equitable Allocation of COVID-19 Vaccine                                                                           | 2 |
| 52 | Anonymous, 2020        | ASHP principles for COVID-19 vaccine distribution, allocation, and mass immunization                                                                         | 2 |
| 53 | Ayers, 2021            | Disparities in H1N1 Vaccination Rates: a Systematic Review and Evidence Synthesis to Inform COVID-19 Vaccination Efforts                                     | 2 |
| 54 | Bell, 2018             | Preparedness for influenza vaccination during a pandemic in the World Health Organization Western Pacific Region                                             | 2 |
| 55 | Cerilles, n.d.         | Analysing the interplay between the right to health and pharmaceutical patent rights in the introduction of a COVID-19 vaccine into the Philippines          | 2 |
| 56 | Edwards, 2009          | Strategies for broad global access to pandemic influenza vaccines                                                                                            | 2 |
| 57 | Hadler, 2005           | Public health strategies for distribution of influenza vaccine during an influenza pandemic                                                                  | 2 |
| 58 | Lee, 2021              | Last-Mile Logistics of Covid Vaccination - The Role of Health Care Organizations                                                                             | 2 |
| 59 | Looi, 2021             | Jeremy Farrar: Make vaccine available to other countries as soon as our most vulnerable people have received it                                              | 2 |
| 60 | Martin, 2021           | Maintaining a Focus on Health Equity During the COVID-19 Vaccine Rollout                                                                                     | 2 |
| 61 | Medina-Walpole, 2021   | What It Will Take to Equitably Distribute a COVID-19 Vaccine                                                                                                 | 2 |
| 62 | Muula, 2007            | How relevant is Bellagio statement of principles on social justice and influenza to Africa?                                                                  | 2 |
| 63 | Subbaraman, 2020       | Who gets a COVID vaccine first? Access plans are taking shape                                                                                                | 2 |
| 64 | Todd, 2021             | Learning from past mistakes? The COVID-19 vaccine and the inverse equity hypothesis                                                                          | 2 |
| 65 | Varshney, 2021         | Vaccine diplomacy: Exploring the benefits of international collaboration                                                                                     | 2 |
| 66 | Adar, 2020             | Distribution equality as an optimal epidemic mitigation strategy                                                                                             | 3 |
| 67 | Alaran, 2021           | Uneven power dynamics must be levelled in COVID-19 vaccines access and distribution                                                                          | 3 |

|     |                                  |                                                                                                                                                                            |   |
|-----|----------------------------------|----------------------------------------------------------------------------------------------------------------------------------------------------------------------------|---|
| 68  | AlKhalidi, 2021                  | Rethinking and strengthening the Global Health Diplomacy through triangulated nexus between policy makers, scientists and the community in light of COVID-19 global crisis | 3 |
| 69  | Al-Oraibi, 2021                  | Migrant health is public health: a call for equitable access to COVID-19 vaccines                                                                                          | 3 |
| 70  | Anderson, 2020                   | Intensifying vaccine production                                                                                                                                            | 3 |
| 71  | Anonymous, 2021                  | COVID-19 Vaccine: Development, Testing, and Distribution                                                                                                                   | 3 |
| 72  | Bartovic, 2021                   | Ensuring equitable access to vaccines for refugees and migrants during the COVID-19 pandemic                                                                               | 3 |
| 73  | Bhatia, 2013                     | The H1N1 influenza pandemic: need for solutions to ethical problems                                                                                                        | 3 |
| 74  | Billington, 2020                 | Developing Vaccines for SARS-CoV-2 and Future Epidemics and Pandemics: Applying Lessons from Past Outbreaks                                                                | 3 |
| 75  | Boulton, 2021                    | Advancing Global Vaccination Equity                                                                                                                                        | 3 |
| 76  | Boum Ii, 2021                    | How to ensure a needs-driven and community-centred vaccination strategy for COVID-19 in Africa                                                                             | 3 |
| 77  | Briand, 2010                     | Future developments in global influenza surveillance                                                                                                                       | 3 |
| 78  | Bryan, 2021                      | WTO Waiver from Intellectual Property Protection for COVID-19 Vaccines and Treatments: A Critical Review                                                                   | 3 |
| 79  | Cheong, 2020                     | Unequal Access to Vaccines Will Exacerbate Other Inequalities                                                                                                              | 3 |
| 80  | Coleman, 2009                    | Allocating vaccines and antiviral medications during an influenza pandemic                                                                                                 | 3 |
| 81  | Commissioners, 2021              | Human rights and fair access to COVID-19 vaccines: the International AIDS Society-Lancet Commission on Health and Human Rights                                             | 3 |
| 82  | Dadari, 2021                     | Pro-equity immunization and health systems strengthening strategies in select Gavi-supported countries                                                                     | 3 |
| 83  | Elbe, 2010                       | Haggling over viruses: the downside risks of securitizing infectious disease                                                                                               | 3 |
| 84  | Eurosurveillance editorial, 2011 | Agreement on a pandemic influenza preparedness framework for the sharing of viruses and benefit sharing                                                                    | 3 |
| 85  | Fedson, 2006                     | Vaccine development for an imminent pandemic: why we should worry, what we must do                                                                                         | 3 |
| 86  | Gladas, 2021                     | Supporting efforts for a global COVID-19 vaccine                                                                                                                           | 3 |
| 87  | Goh, 2021                        | Covid-19 vaccination: the dangers of "values" imperialism                                                                                                                  | 3 |
| 88  | Gostin, 2006                     | Medical countermeasures for pandemic influenza: ethics and the law                                                                                                         | 3 |
| 89  | Griffin, 2020                    | Covid-19: Governments should demand transparency on vaccine deals, says MSF                                                                                                | 3 |
| 90  | Gronvall, 2006                   | Removing barriers to global pandemic influenza vaccination                                                                                                                 | 3 |
| 91  | Guerin, 2020                     | The consequence of COVID-19 on the global supply of medical products: Why Indian generics matter for the world?                                                            | 3 |
| 92  | Gurwitz, 2021                    | Ethical tradeoffs in SARS-CoV-2 vaccine development: Assuring fair availability for low-income countries                                                                   | 3 |
| 93  | Haaheim, 2007                    | Vaccines for an influenza pandemic: scientific and political challenges                                                                                                    | 3 |
| 94  | Halabi, 2020                     | No-Fault Compensation for Vaccine Injury - The Other Side of Equitable Access to Covid-19 Vaccines                                                                         | 3 |
| 95  | Hendriks, 2011                   | An international technology platform for influenza vaccines                                                                                                                | 3 |
| 96  | Henn, 2020                       | Allocation criteria for an initial shortage of a future SARS-CoV-2 vaccine and necessary measures for global immunity                                                      | 3 |
| 97  | Huneycutt, 2020                  | Finding equipoise: CEPI revises its equitable access policy                                                                                                                | 3 |
| 98  | Jecker, 2021                     | Out of Africa: A Solidarity-Based Approach to Vaccine Allocation                                                                                                           | 3 |
| 99  | Jecker, 2021                     | Vaccine ethics: an ethical framework for global distribution of COVID-19 vaccines                                                                                          | 3 |
| 100 | Kamradt-Scott, 2013              | The politics of medicine and the global governance of pandemic influenza                                                                                                   | 3 |
| 101 | Karim, 2020                      | COVID-19 vaccine affordability and accessibility                                                                                                                           | 3 |
| 102 | Katz, 2021                       | From Vaccine Nationalism to Vaccine Equity - Finding a Path Forward                                                                                                        | 3 |
| 103 | Kelley, 2020                     | An appeal for practical social justice in the COVID-19 global response in low-income and middle-income countries                                                           | 3 |

|     |                   |                                                                                                                                                      |   |
|-----|-------------------|------------------------------------------------------------------------------------------------------------------------------------------------------|---|
| 104 | Kelley, 2021      | Process and operations strategies to enable global access to antibody therapies                                                                      | 3 |
| 105 | Khamisi, 2020     | If a coronavirus vaccine arrives, can the world make enough?                                                                                         | 3 |
| 106 | Kieny, 2009       | WHO supports fair access to influenza A (H1N1) vaccine                                                                                               | 3 |
| 107 | Koff, 2021        | A universal coronavirus vaccine                                                                                                                      | 3 |
| 108 | Kyd, 2010         | 3rd Global Vaccine Congress                                                                                                                          | 3 |
| 109 | Lee, 2011         | The Benefits To All Of Ensuring Equal And Timely Access To Influenza Vaccines In Poor Communities                                                    | 3 |
| 110 | Li, 2010          | Healthcare system cost evaluation of antiviral stockpiling for pandemic influenza preparedness                                                       | 3 |
| 111 | McLachlan, 2012   | A proposed non-consequentialist policy for the ethical distribution of scarce vaccination in the face of an influenza pandemic                       | 3 |
| 112 | McLachlan, 2015   | On the random distribution of scarce doses of vaccine in response to the threat of an influenza pandemic: a response to Wardrope                     | 3 |
| 113 | Monto, 2011       | Response to the 2009 pandemic: effect on influenza control in wealthy and poor countries                                                             | 3 |
| 114 | Mukherjee, 2020   | Global efforts on vaccines for COVID-19: Since, sooner or later, we all will catch the coronavirus                                                   | 3 |
| 115 | Nguyen, 2010      | The influenza challenge                                                                                                                              | 3 |
| 116 | Pagliusi, 2018    | Vaccines, inspiring innovation in health                                                                                                             | 3 |
| 117 | Palkonyay, 2016   | A decade of adaptation: Regulatory contributions of the World Health Organization to the Global Action Plan for Influenza Vaccines (2006-2016)       | 3 |
| 118 | Peters, 2021      | Ensuring vaccine supply meets global needs                                                                                                           | 3 |
| 119 | Rastegar, 2021    | An inventory-location optimization model for equitable influenza vaccine distribution in developing countries during the COVID-19 pandemic           | 3 |
| 120 | Roope, 2020       | How Should a Safe and Effective COVID-19 Vaccine be Allocated? Health Economists Need to be Ready to Take the Baton                                  | 3 |
| 121 | Ruscio, 2020      | Shaping meeting to explore the value of a coordinated work plan for epidemic and pandemic influenza vaccine preparedness                             | 3 |
| 122 | Sabri, 2020       | Solidarity in the time of covid-19 pandemic                                                                                                          | 3 |
| 123 | Saunders, 2018    | EQUALITY IN THE ALLOCATION OF SCARCE VACCINES                                                                                                        | 3 |
| 124 | Shretta, 2021     | Vaccinating the world against COVID-19: getting the delivery right is the greatest challenge                                                         | 3 |
| 125 | Smith, 2021       | Top five ethical lessons of COVID-19 that the world must learn                                                                                       | 3 |
| 126 | Snyder, 2020      | Designing Pull Funding For A COVID-19 Vaccine                                                                                                        | 3 |
| 127 | Stohr, 2006       | Influenza pandemic vaccines: How to ensure a low-cost, low-dose option                                                                               | 3 |
| 128 | Stoto, 2013       | Lessons about the state and local public health system response to the 2009 H1N1 pandemic: a workshop summary                                        | 3 |
| 129 | Straetemans, 2007 | Prioritization strategies for pandemic influenza vaccine in 27 countries of the European Union and the Global Health Security Action Group: a review | 3 |
| 130 | Tatar, 2021       | The Role of Good Governance in the Race for Global Vaccination during the COVID-19 Pandemic                                                          | 3 |
| 131 | Wardrope, 2012    | Scarce vaccine supplies in an influenza pandemic should not be distributed randomly: reply to McLachlan                                              | 3 |
| 132 | Wong, 2018        | Funding vaccines for emerging infectious diseases                                                                                                    | 3 |
| 133 | Wynia, 2006       | Ethics and public health emergencies: rationing vaccines                                                                                             | 3 |
| 134 | Yau, n.d.         | Mapping the inequality of the global distribution of seasonal influenza vaccine                                                                      | 3 |
| 135 | Zard, n.d.        | Leave no one behind: ensuring access to COVID-19 vaccines for refugee and displaced populations                                                      | 3 |
| 136 | Aranzazu, 2013    | The WHO influenza surveillance network. Modes of circulation of viruses strains, knowledge and technologies, 1947-2007                               | 4 |

|     |                                                               |                                                                                                                                                                    |   |
|-----|---------------------------------------------------------------|--------------------------------------------------------------------------------------------------------------------------------------------------------------------|---|
| 137 | Bingzhe, 2020                                                 | Expanding the pandemic influenza preparedness framework to the epidemic of COVID-19                                                                                | 4 |
| 138 | Leineweber, 2021                                              | The influence of the U.S. response to COVID-19 in Global Health                                                                                                    | 4 |
| 139 | Collin, 2009                                                  | [Influenza vaccine: globalization of public health stakes]                                                                                                         | 5 |
| 140 | Donatelli, 2003                                               | [WHO Influenza Global Agenda]                                                                                                                                      | 5 |
| 141 | Iacob, 2020                                                   | The Role of the Joint Procurement Agreement during the COVID-19 Pandemic: Assessing Its Usefulness and Discussing Its Potential to Support a European Health Union | 5 |
| 142 | Jorgensen, 2013                                               | Unequal access to vaccines in the WHO European Region during the A(H1N1) influenza pandemic in 2009                                                                | 5 |
| 143 | Lopalco, 2016                                                 | Pandemic vaccines: Are we prepared for the next pandemic?                                                                                                          | 5 |
| 144 | Mark, 2020                                                    | The Procurement of a COVID-19 Vaccine in Developing Countries: Lessons from the 2009-H1N1 Pandemic                                                                 | 5 |
| 145 | Mendes, 2021                                                  | Tackling inequitable distribution of the COVID-19 vaccine                                                                                                          | 5 |
| 146 | Saransh, 2021                                                 | Building Resilient Vaccine Distribution                                                                                                                            | 5 |
| 147 | Ana Santos, 2020                                              | The COVID-19 Vaccine Race: Intellectual Property, Collaboration(s), Nationalism and Misinformation                                                                 | 6 |
| 148 | Ana Santos, 2020                                              | The Reemergence of Vaccine Nationalism                                                                                                                             | 6 |
| 149 | Ana Santos, 2020                                              | The Intellectual Property of COVID-19                                                                                                                              | 6 |
| 150 | Armin von, 2020                                               | The Role of International Law in Vaccinating Against COVID-19: Appraising the COVAX Initiative                                                                     | 6 |
| 151 | Benjamin, 2020                                                | COVID-19 Vaccine Research, Development, Regulation and Access                                                                                                      | 6 |
| 152 | François, 2020                                                | Spatial Allocation of Scarce Vaccine and Antivirals for COVID-19                                                                                                   | 6 |
| 153 | Goldstein, 2021                                               | Failure to achieve global vaccine equity will have dire consequences                                                                                               | 6 |
| 154 | Jorge, 2021                                                   | US Support for a WTO Waiver of COVID-19 Intellectual Property – What Does it Mean?                                                                                 | 6 |
| 155 | Mohamed Mustafa, 2021                                         | The Cost of Procuring and Delivering COVID-19 Vaccines in Low- and Middle-Income Countries: A Model of Projected Resource Needs                                    | 6 |
| 156 | National Academies of Sciences Engineering and Medicine, 2020 | Framework for Equitable Allocation of COVID-19 Vaccine                                                                                                             | 6 |
| 157 | Shlomit, 2021                                                 | Intellectual Property Laws in the Digital Era: An International Distributive Justice Perspective                                                                   | 6 |
| 158 | Simon, 2021                                                   | The Covid-19 Vaccine Production Club: Will Value Chains Temper Nationalism?                                                                                        | 6 |
| 159 | Viviana Munoz, 2020                                           | The COVID-19 Pandemic: R&D and Intellectual Property Management for Access to Diagnostics, Medicines and Vaccines                                                  | 6 |
